# Supplementary material for: More than a CO source: palladium-catalyzed carbonylative synthesis of butenolides from propargyl alcohols and TFBen
Source: Royal Society of Chemistry journal article supplement (doi:10.1039/c9qo00779b), 2019-01-01

# Supporting Information

## Table of Contents

|                                                                                |            |
|--------------------------------------------------------------------------------|------------|
| <b>1.General Information .....</b>                                             | <b>S2</b>  |
| <b>2.Preparation of TFBen .....</b>                                            | <b>S2</b>  |
| <b>3. Procedure for the Synthesis of Propargyl Alcohols .....</b>              | <b>S2</b>  |
| <b>4.Characterization of TFBen and Substrates .....</b>                        | <b>S3</b>  |
| <b>5.General Procedure for Reaction of Propargyl Alcohols with TFBen .....</b> | <b>S12</b> |
| <b>6.Characterization of Products .....</b>                                    | <b>S13</b> |
| <b>7. References .....</b>                                                     | <b>S24</b> |
| <b>8.Spectra of TFBen and Substrates .....</b>                                 | <b>S25</b> |
| <b>9. Spectra of Products .....</b>                                            | <b>S50</b> |

## 1. General Information

Unless otherwise noted, all reactions were performed under nitrogen protection unless otherwise noted. All reagents were obtained from commercial sources and used as received without further purification. Column chromatography was performed on silica gel (200–300 mesh) using petroleum ether (bp 60–90 °C) and ethyl acetate as eluent. Reactions were followed with TLC (0.25 mm silica gel 20 cm×20 cm). Visualization was accomplished with UV light. <sup>1</sup>H and <sup>13</sup>C NMR spectra were taken on 400 MHz instruments, and spectral data were reported in ppm relative to tetramethylsilane (TMS) as internal standard and CDCl<sub>3</sub> as solvent.

## 2. Preparation of TFBen

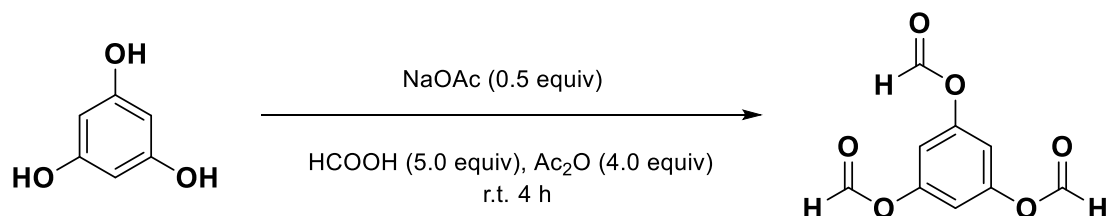

Formic acid (8.4 mL, 222.8 mmol, 5.0 equiv.) was added to acetic anhydride (16.8 mL, 178.2 mmol, 4.0 equiv.) at rt. The mixture was stirred at 60 °C for 1 h and cooled to rt. The resulting solution was poured into a flask containing 1,3,5-trihydroxybenzene (5.62 g, 44.6 mmol, 1.0 equiv.) and NaOAc (1.83 g, 22.3 mmol, 0.5 equiv.). The mixture was stirred for 4 h in a water bath and then diluted with toluene (100 mL), washed with H<sub>2</sub>O (50 mL) twice. Keep the organic phase in fridge (2-8 °C) overnight. Then filtered and dried in vacuo to afford the desired product benzene-1,3,5-triyl triformate (TFBen) (5.1 g, 55%) as a white solid.

## 3. Procedure for the Synthesis of Propargyl Alcohols<sup>1</sup>

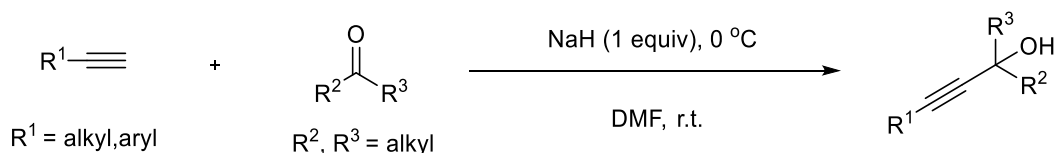

To a 50 mL round-bottom flask was added an alkyne (7 mmol, 1 equiv.) in DMF (5 mL). The mixture was cooled to 0 °C and stirred for 10 min. Then sodium hydride (7 mmol, 1 equiv.) was added and the reaction continued at 0 °C for 4-6 h. A ketone

(1.2 equiv.) was added and the system was warmed to room temperature for 10 h. After the reaction was completed, the reaction mixture was diluted with saturated sodium bicarbonate solution (60 mL) and extracted with ethyl acetate (40 mL) three times. The combined organic phases were dried with anhydrous Na<sub>2</sub>SO<sub>4</sub>, concentrated and purified by silica gel column chromatography to obtain the desired propargyl alcohol. (**1a**, **1b**, **1c**, **1d**, **1f**, **1g**, **1h**, **1i**, **1o**, **1q**, **1r**, **1s**, **1t**, **1u**, **1v**, **1w**)

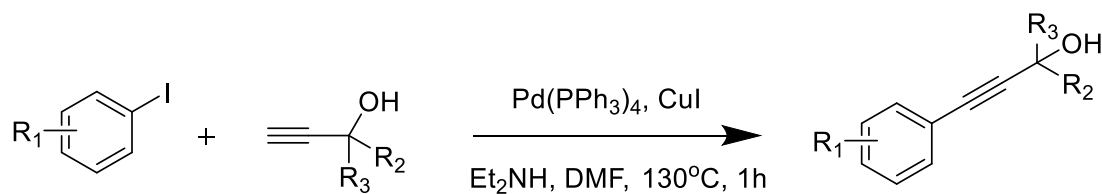

R<sub>1</sub>, R<sub>2</sub>, R<sub>3</sub> = alkyl, aryl

An oven-dried 35 mL Schlenk tube equipped with a magnetic stirring bar and a rubber septum was charged with Pd(PPh<sub>3</sub>)<sub>4</sub> (57.5 mg, 5 mol%), CuI (19 mg, 1 mol%). After purging the vessel with alternating vacuum and nitrogen cycles, degassed DMF (5 mL), aryl iodides (3 mmol, 1 equiv.), Et<sub>2</sub>NH (412 uL, 4.5 mmol, 4 equiv.) and an alkyne (3.6 mmol, 1.2 equiv.) were added and the mixture was stirred at 130 °C for 1 h. After cooling to room temperature, the mixture was diluted with water (20 mL) and extracted with EtOAc (20 mL). Combined organic extracts were washed with H<sub>2</sub>O (20 mL), saturated aqueous NaCl (20 mL), dried over MgSO<sub>4</sub> and concentrated in vacuum. The crude product was purified by silica gel chromatography affording the corresponding product. (**1j**, **1k**, **1l**, **1m**, **1n**)

#### 4. Characterization of TFBen and Substrates

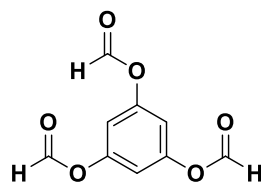

##### Benzene-1,3,5-triyl triformate, TFBen<sup>2</sup>

White solid, mp. 53.2-55.6 °C.

<sup>1</sup>H NMR (400 MHz, CDCl<sub>3</sub>): δ = 8.24 (s, 3H), 6.97 (s, 3H).

<sup>13</sup>C NMR (100 MHz, CDCl<sub>3</sub>): δ = 158.06, 150.30, 112.62.

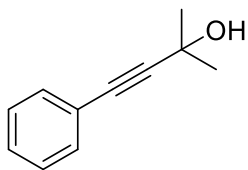

**2-Methyl-4-phenyl-3-butyn-2-ol, 1a**

**Yellow solid, mp. 49-51 °C.**

**<sup>1</sup>H NMR (400 MHz, CDCl<sub>3</sub>):**  $\delta$  = 7.41 - 7.43 (m, 2 H), 7.29 - 7.31 (m, 3 H), 2.33 (s, br, 1 H), 1.62 (s, 6 H).

**<sup>13</sup>C NMR (100 MHz, CDCl<sub>3</sub>):**  $\delta$  = 131.6, 128.2, 128.2, 122.7, 93.8, 82.1, 65.6, 31.4.

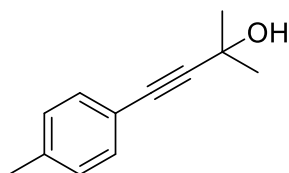

**2-Methyl-4-(*p*-tolyl)but-3-yn-2-ol, 1b**

**Yellow solid, mp. 49-51 °C.**

**<sup>1</sup>H NMR (400 MHz, CDCl<sub>3</sub>):**  $\delta$  = 7.31 (d, *J* = 8.0 Hz, 2H), 7.10 (d, *J* = 7.9 Hz, 2H), 2.57 (s, 1H), 2.34 (s, 3H), 1.61 (s, 6H).

**<sup>13</sup>C NMR (100 MHz, CDCl<sub>3</sub>):**  $\delta$  = 138.2, 131.4, 128.9, 119.6, 93.1, 82.1, 65.5, 31.4, 21.3.

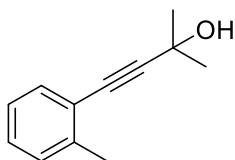

**3-Methyl-4-(*o*-tolyl)but-3-yn-2-ol, 1c**

**Yellow oil**

**<sup>1</sup>H NMR (400 MHz, CDCl<sub>3</sub>):**  $\delta$  = 7.39 (d, *J* = 7.5 Hz, 1H), 7.23 - 7.17 (m, 2H), 7.12 (t, 1H), 2.41 (s, 3H), 1.63 (s, 6H).

**<sup>13</sup>C NMR (100 MHz, CDCl<sub>3</sub>):**  $\delta$  = 140.1, 131.8, 129.3, 128.2, 125.4, 122.4, 97.9, 81.0, 65.7, 31.6, 20.5.

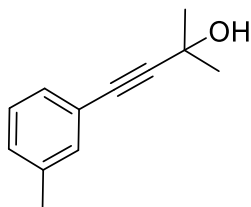

**2-Methyl-4-(3-methylphenyl)-3-butyn-2-ol, 1d**

**Yellow oil**

**<sup>1</sup>H NMR (400 MHz, CDCl<sub>3</sub>):**  $\delta$  = 7.09 - 7.24 (m, 4 H), 2.32 (s, 3 H), 2.26 (s, br, 1 H), 1.62 (s, 6 H).

$^{13}\text{C}$ -NMR (100 MHz,  $\text{CDCl}_3$ ):  $\delta = 137.9, 132.2, 129.1, 128.6, 128.1, 122.5, 93.4, 82.2, 65.5, 31.5, 21.1$ .

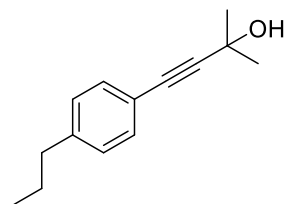

**2-Methyl-4-(4-propylphenyl)but-3-yn-2-ol, 1e**

**Yellow oil**

$^1\text{H}$  NMR (400 MHz,  $\text{CDCl}_3$ ):  $\delta = 7.32$  (d,  $J = 8.1$  Hz, 2H),  $7.09$  (d,  $J = 8.0$  Hz, 2H),  $2.56$  (t,  $J = 7.6$  Hz, 2H),  $2.21$  (s, 1H),  $1.64 - 1.58$  (m, 8H),  $0.91$  (t,  $J = 7.3$  Hz, 3H);  
 $^{13}\text{C}$  NMR (100 MHz,  $\text{CDCl}_3$ ):  $\delta = 143.0, 131.5, 128.4, 119.8, 93.1, 82.2, 65.6, 37.8, 31.5, 24.3, 13.7$ .

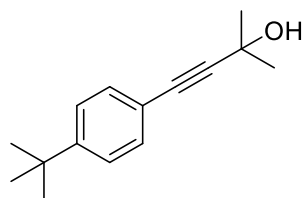

**3-(4-(*tert*-Butyl)phenyl)-2-methylbut-3-yn-2-ol, 1f**

**White solid, mp. 89-91 °C.**

$^1\text{H}$  NMR (400 MHz,  $\text{CDCl}_3$ ):  $\delta = 7.33$  (q,  $J = 8.5$  Hz, 4H),  $1.61$  (s, 6H),  $1.30$  (s, 9H).  
 $^{13}\text{C}$  NMR (100 MHz,  $\text{CDCl}_3$ ):  $\delta = 151.5, 131.3, 125.2, 119.7, 93.1, 82.2, 65.6, 34.7, 31.5, 31.1$ .

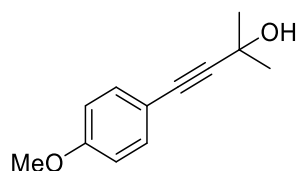

**4-(4-Methoxyphenyl)-2-methylbut-3-yn-2-ol, 1g**

**Yellow oil**

$^1\text{H}$  NMR (400 MHz,  $\text{CDCl}_3$ ):  $\delta = 7.35 - 7.33$  (m, 2H),  $6.81$  (d,  $J = 8.7$  Hz, 2H),  $3.78$  (s, 3H),  $2.51$  (s, 1H),  $1.60$  (s, 6H).  
 $^{13}\text{C}$  NMR (100 MHz,  $\text{CDCl}_3$ ):  $\delta = 159.4, 133.0, 114.8, 113.8, 92.4, 81.9, 65.5, 55.2, 31.5$ .

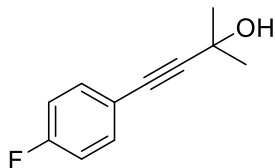

**4-(4-Fluorophenyl)-2-methylbut-3-yn-2-ol, 1h**

**Yellow oil**

**<sup>1</sup>H NMR (400 MHz, CDCl<sub>3</sub>):**  $\delta$  = 7.38 (dd,  $J$  = 8.7, 5.4 Hz, 2H), 6.98 (t,  $J$  = 8.7 Hz, 2H), 2.37 (s, 1H), 1.61 (s, 6H).

**<sup>13</sup>C NMR (100 MHz, CDCl<sub>3</sub>):**  $\delta$  = 162.4, 133.5, 118.8, 115.4, 93.5, 81.0, 65.5, 31.4.

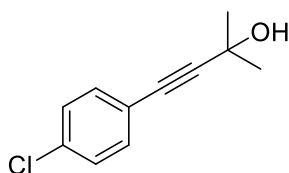

**4-(4-Chlorophenyl)-2-methylbut-3-yn-2-ol, 1i**

**Yellow oil**

**<sup>1</sup>H NMR (400 MHz, CDCl<sub>3</sub>):**  $\delta$  = 7.33 (d,  $J$  = 8.5 Hz, 2H), 7.26 (d,  $J$  = 8.6 Hz, 2H), 2.31 (s, 1H), 1.61 (s, 6H).

**<sup>13</sup>C NMR (100 MHz, CDCl<sub>3</sub>):**  $\delta$  = 134.2, 132.8, 128.5, 121.2, 94.7, 81.0, 65.6, 31.4.

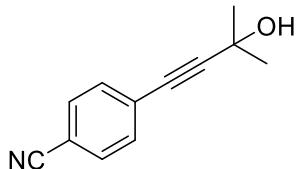

**2-Methyl-4-(4'-cyanophenyl)-3-butyn-2-ol, 1j**

**Yellow solid, mp 65-67 °C.**

**<sup>1</sup>H NMR (400 MHz, CDCl<sub>3</sub>):**  $\delta$  = 7.57 (d,  $J$  = 8.7 Hz, 2 H), 7.46 (d,  $J$  = 8.7 Hz, 2 H), 2.39 (s, 1 H), 1.61 (s, 6 H).

**<sup>13</sup>C NMR (100 MHz, CDCl<sub>3</sub>):**  $\delta$  = 132.1, 131.9, 127.7, 118.3, 111.5, 98.2, 80.5, 65.5, 31.2.

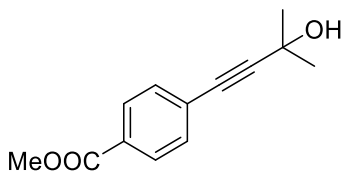

**Methyl 4-(3-hydroxy-3-methylbut-1-ynyl)benzoate, 1k**

**Yellow solid, mp. 75-77 °C**

**<sup>1</sup>H NMR (400 MHz, CDCl<sub>3</sub>):**  $\delta$  = 7.95 (d,  $J$  = 8.3 Hz, 2 H), 7.44 (d,  $J$  = 8.3 Hz, 2 H), 3.90 (s, 3 H), 2.36 (s, 1 H), 1.62 (s, 6 H).

$^{13}\text{C}$  NMR (100 MHz,  $\text{CDCl}_3$ ):  $\delta = 166.5, 131.5, 129.5, 129.4, 127.5, 96.8, 81.4, 65.5, 52.2, 31.3$ .

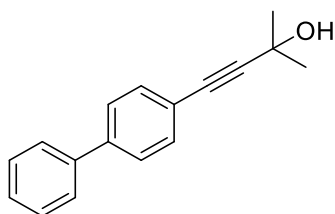

**4-([1,1'-Biphenyl]-4-yl)-2-methylbut-3-yn-2-ol, 1l**

White solid, mp. 105-107 °C

$^1\text{H}$  NMR (400 MHz,  $\text{CDCl}_3$ ):  $\delta = 7.51$  (d,  $J = 7.9$  Hz, 2H), 7.46 (d,  $J = 7.9$  Hz, 2H), 7.40 (d,  $J = 7.9$  Hz, 2H), 7.36 (t,  $J = 7.6$  Hz, 2H), 7.27 (t,  $J = 8.2$  Hz, 3H), 1.99 (br, 1H), 1.56 (s, 6H).

$^{13}\text{C}$  NMR (100 MHz,  $\text{CDCl}_3$ ):  $\delta = 141.0, 140.3, 132.0, 128.8, 127.6, 127.0, 126.9, 121.6, 94.4, 82.0, 65.7, 31.5$ .

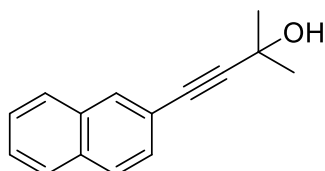

**2-Methyl-4-(naphthalen-1-yl)-3-butyn-2-ol, 1m**

Yellow oil

$^1\text{H}$  NMR (400 MHz,  $\text{CDCl}_3$ ):  $\delta = 8.30$  (d,  $J = 8.1$  Hz, 1 H), 7.83 (t,  $J = 8.4$  Hz, 2 H), 7.66 (dd,  $J = 7.2, 1.1$  Hz, 1 H), 7.49 – 7.60 (m, 2 H), 7.41 (m, 1 H), 2.27 (s, br, 1 H), 1.74 (s, 6 H).

$^{13}\text{C}$  NMR (100 MHz,  $\text{CDCl}_3$ ):  $\delta = 133.2, 133.1, 130.3, 128.7, 128.2, 126.7, 126.3, 126.0, 125.1, 120.3, 98.8, 80.2, 65.9, 31.6$ .

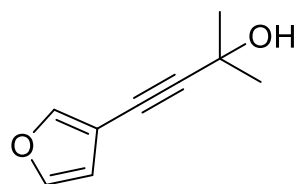

**4-(Furan-3-yl)-2-methylbut-3-yn-2-ol, 1n**

Yellow oil

$^1\text{H}$  NMR (400 MHz,  $\text{CDCl}_3$ ):  $\delta = 7.62$  (s, 1H), 7.39 (d,  $J = 1.7$  Hz, 1H), 6.46 (d,  $J = 1.2$  Hz, 2H), 2.26 (s, 2H), 1.63 (s, 13H).

$^{13}\text{C}$  NMR (100 MHz,  $\text{CDCl}_3$ ):  $\delta = 145.6, 142.8, 112.5, 107.0, 95.6, 73.4, 65.6, 31.4$ .

HRMS (ESI):  $[\text{M}+\text{H}^+]$ calcd for  $\text{C}_9\text{H}_{11}\text{O}_2^+$ , 151.0754; found, 151.0755.

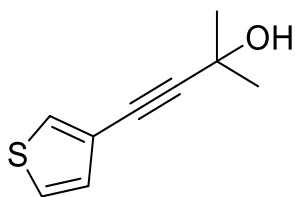

**2-Methyl-4-(thiophen-3-yl)but-3-yn-2-ol, 1o**

**Yellow oil**

**<sup>1</sup>H NMR (400 MHz, CDCl<sub>3</sub>):**  $\delta$  = 7.42 – 7.41 (m, 1H), 7.25 – 7.24 (m, 1H), 7.09 – 7.08 (m, 1H), 1.61 (s, 6H).

**<sup>13</sup>C NMR (100 MHz, CDCl<sub>3</sub>):**  $\delta$  = 129.8, 128.5, 125.2, 121.6, 93.4, 77.2, 65.5, 31.4.

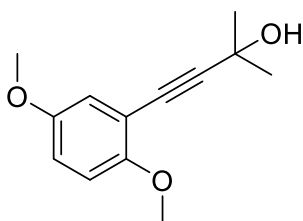

**4-(2,5-Dimethoxyphenyl)-2-methylbut-3-yn-2-ol, 1p**

**Yellow oil**

**<sup>1</sup>H NMR (400 MHz, CDCl<sub>3</sub>):**  $\delta$  = 6.85 (d, *J* = 3.0 Hz, 1H), 6.74 (dd, *J* = 9.0, 3.0 Hz, 1H), 6.69 (d, *J* = 9.0 Hz, 1H), 3.74 (s, 3H), 3.66 (s, 3H), 3.63 (s, 1H), 1.57 (s, 6H).

**<sup>13</sup>C NMR (100 MHz, CDCl<sub>3</sub>):**  $\delta$  = 154.4, 153.2, 118.2, 115.7, 112.5, 112.2, 98.1, 78.3, 65.6, 56.5, 55.8, 31.5.

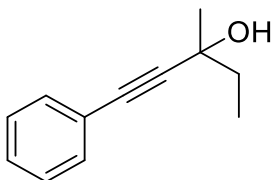

**4-Methyl-1-phenylpent-1-yn-3-ol, 1q**

**Yellow oil**

**<sup>1</sup>H NMR (400 MHz, CDCl<sub>3</sub>):**  $\delta$  = 7.40 (dd, *J* = 6.6, 3.0 Hz, 2H), 7.26 – 7.25 (m, 3H), 2.86 (s, 1H), 1.85 – 1.71 (m, 2H), 1.56 (s, 3H), 1.09 (t, *J* = 7.5 Hz, 3H).

**<sup>13</sup>C NMR (100 MHz, CDCl<sub>3</sub>):**  $\delta$  = 131.5, 128.1, 128.0, 122.7, 92.7, 83.2, 68.9, 36.5, 29.1, 9.0.

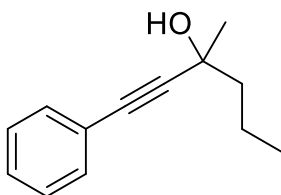

**4-Methyl-1-phenylhex-1-yn-3-ol, 1r**

**Yellow oil**

**<sup>1</sup>H NMR (400 MHz, CDCl<sub>3</sub>):**  $\delta$  = 7.40 (dd, *J* = 5.0, 2.2 Hz, 2H), 7.29 – 7.27 (m, 3H),



2.40 (s, 1H), 1.76 – 1.70 (m, 2H), 1.62 – 1.57 (m, 5H), 0.98 (t,  $J = 7.2$  Hz, 3H).  
 $^{13}\text{C}$  NMR (100 MHz,  $\text{CDCl}_3$ ):  $\delta = 131.6, 128.1, 128.1, 122.7, 92.9, 83.2, 68.5, 45.9, 29.7, 18.1, 14.2$ .

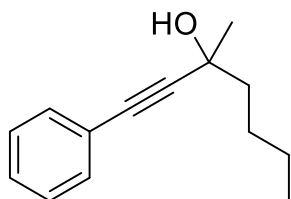

**4-Methyl-1-phenylhept-1-yn-3-ol, 1s**

Yellow oil

$^1\text{H}$  NMR (400 MHz,  $\text{CDCl}_3$ ):  $\delta = 7.41$  (dd,  $J = 6.6, 3.0$  Hz, 2H),  $7.28$  (dd,  $J = 6.4, 3.6$  Hz, 3H),  $2.52$  (s, 1H),  $1.861 - 1.69$  (m, 2H),  $1.60 - 1.48$  (m, 5H),  $1.42 - 1.33$  (m, 2H),  $0.93$  (t,  $J = 7.3$  Hz, 3H).

$^{13}\text{C}$  NMR (100 MHz,  $\text{CDCl}_3$ ):  $\delta = 131.5, 128.1, 128.1, 122.7, 93.0, 83.1, 68.5, 43.4, 29.7, 26.9, 22.7, 14.0$ .

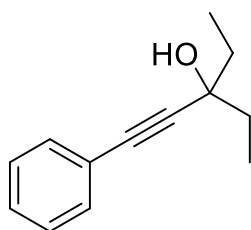

**3-Ethyl-1-phenylpent-1-yn-3-ol, 1t**

Yellow oil

$^1\text{H}$  NMR (400 MHz,  $\text{CDCl}_3$ ):  $\delta = 7.42$  (dd,  $J = 6.5, 2.9$  Hz, 2H),  $7.29 - 7.27$  (m, 3H),  $2.26$  (s, 1H),  $1.83 - 1.69$  (m, 4H),  $1.10$  (t,  $J = 7.4$  Hz, 6H).

$^{13}\text{C}$  NMR (100 MHz,  $\text{CDCl}_3$ ):  $\delta = 131.6, 128.2, 128.1, 122.8, 91.6, 84.4, 72.5, 34.4, 8.6$ .

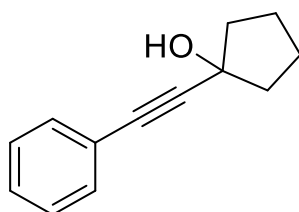

**1-(Phenylethynyl)cyclopentan-1-ol, 1u**

Yellow oil

$^1\text{H}$  NMR (400 MHz,  $\text{CDCl}_3$ ):  $\delta = 7.43 - 7.39$  (m, 2H),  $7.29 - 7.25$  (m, 3H),  $2.23$  (s, 1H),  $2.08 - 2.03$  (m, 4H),  $1.90 - 1.73$  (dddd,  $J = 15.2, 12.2, 11.4, 7.5$  Hz, 4H).

$^{13}\text{C}$  NMR (100 MHz,  $\text{CDCl}_3$ ):  $\delta = 131.5, 128.2, 128.1, 122.8, 92.9, 83.0, 74.8, 42.4, 23.4$ .

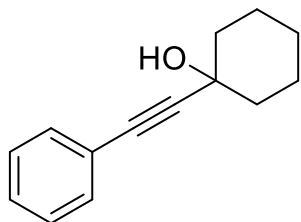

**1-(Phenylethynyl)cyclohexan-1-ol, 1v**

White solid, mp. 65-67 °C.

<sup>1</sup>H NMR (400 MHz, CDCl<sub>3</sub>): δ = 7.43 – 7.41 (m, 2H), 7.29 (dd, *J* = 6.5, 3.6 Hz, 3H), 2.38 (s, 1H), 2.03 – 1.99 (m, 2H), 1.74 – 1.54 (m, 7H), 1.29 – 1.26 (m, 1H).

<sup>13</sup>C NMR (100 MHz, CDCl<sub>3</sub>): δ = 131.6, 128.1, 128.1, 122.8, 92.8, 84.2, 69.0, 39.9, 25.1, 23.3.

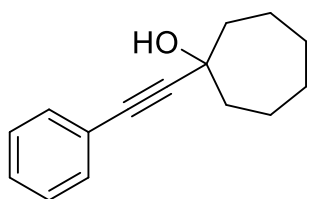

**1-(Phenylethynyl)cycloheptan-1-ol, 1w**

White solid, mp. 79-81 °C

<sup>1</sup>H NMR (400 MHz, CDCl<sub>3</sub>): δ = 7.43 (dd, *J* = 6.6, 3.0 Hz, 2H), 7.30 – 7.28 (m, 3H), 2.12 (dd, *J* = 13.9, 7.4 Hz, 3H), 1.95 – 1.88 (m, 2H), 1.62 (dd, *J* = 11.5, 7.7 Hz, 7H).

<sup>13</sup>C NMR (100 MHz, CDCl<sub>3</sub>): δ = 131.6, 128.2, 128.1, 122.9, 93.8, 83.5, 72.2, 43.1, 27.9, 22.3.

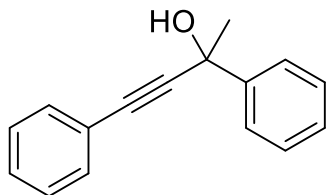

**2,4-diphenylbut-3-yn-2-ol, 1x**

Yellow oil

<sup>1</sup>H NMR (400 MHz, CDCl<sub>3</sub>): δ = 7.74-7.72 (m, 2H), 7.90-7.80 (m, 2H), 7.47-7.46 (m, 2H), 7.40-7.24 (m, 4H), 2.53 (s, 1H), 1.87 (s, 3H).

<sup>13</sup>C NMR (100 MHz, CDCl<sub>3</sub>): δ = 145.7, 131.7, 128.5, 128.4, 128.3, 127.7, 125.0, 122.6, 92.5, 84.9, 70.4, 33.3.

## 5. General Procedure for Reaction of Propargyl Alcohols with TFBen

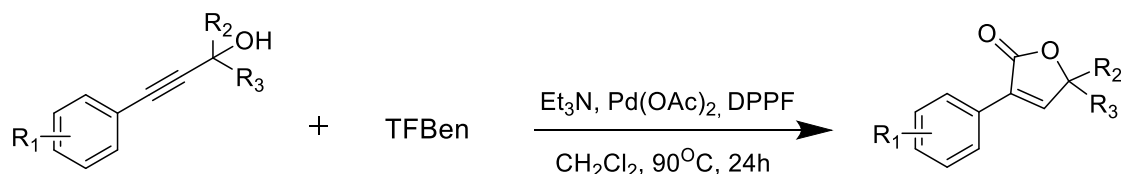

$\text{R}_1, \text{R}_2, \text{R}_3 = \text{alkyl}, \text{aryl}$

$\text{Pd}(\text{OAc})_2$  (5.6 mg, 5 mol%), DPPF (55.4 mg, 20 mol%), TFBen (315 mg, 1.5 mmol, 3.0 equiv.), and a propargyl alcohol (80 mg, 0.5 mmol, 1.0 equiv.) were transferred into an 15 mL tube which was filled with nitrogen.  $\text{Et}_3\text{N}$  (70  $\mu\text{L}$ , 0.5 mmol, 1.0 equiv.) and DCM (2 mL) were added to the reaction tube. Additionally, in order to increase the yield of **2k**, **2p**, **2y**, it is necessary to add  $\text{AgOAc}$  (25 mg, 30 mol%). Then the vial was sealed with a screw-top septum cap quickly and placed in a heating block that was preheated to  $90^\circ\text{C}$ . After a time period of 24 h, the reaction vial was allowed cooled to room temperature. The reaction mixture was filtered and washed with  $\text{EtOAc}$  and then concentrated in vacuo. The crude product was purified by column chromatography on silica gel to afford the corresponding product.

## 6. Characterization of Products

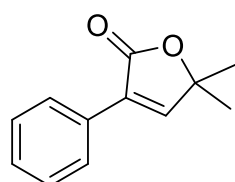

**2a**

### 5,5-Dimethyl-3-phenylfuran-2(5H)-one<sup>3a</sup>

According to general procedure for reaction, the crude residue was purified by flash chromatography (PE/ $\text{EtOAc}$  = 10:1) to give the product as a **white solid** (67.7 mg, 72%). **mp.** 67-69  $^\circ\text{C}$

$^1\text{H NMR}$  (400 MHz,  $\text{CDCl}_3$ ):  $\delta$  = 7.88-7.82 (m, 2H), 7.52 (s, 1H), 7.42-7.35 (m, 3H), 1.54 (s, 6H);

$^{13}\text{C NMR}$  (100 MHz,  $\text{CDCl}_3$ ):  $\delta$  = 171.2, 153.1, 129.9, 129.6, 129.2, 128.6, 127.1, 83.4, 25.7.

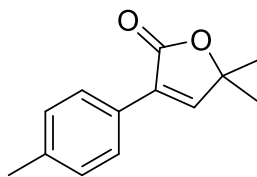

**2b**

**5,5-Dimethyl-3-(p-tolyl)furan-2(5H)-one<sup>3a</sup>**

According to general procedure for reaction, the crude residue was purified by flash chromatography (PE/EtOAc = 10:1) to give the product as a **white solid** (75.7 mg, 75%). **mp. 68-70 °C**

**<sup>1</sup>H NMR (400 MHz, CDCl<sub>3</sub>):**  $\delta$  = 7.75 (d,  $J$  = 8.0 Hz, 2H), 7.45 (s, 1H), 7.21 (d,  $J$  = 8.0 Hz, 2H), 2.37 (s, 3H), 1.54 (s, 6H);

**<sup>13</sup>C NMR (100 MHz, CDCl<sub>3</sub>):**  $\delta$  = 170.8, 151.6, 138.8, 129.4, 128.8, 126.5, 126.3, 82.9, 25.3, 20.9.

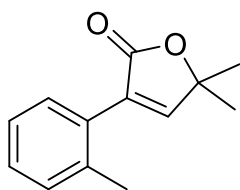

**2c**

**5,5-Dimethyl-3-(o-tolyl)furan-2(5H)-one<sup>3a</sup>**

According to general procedure for reaction, the crude residue was purified by flash chromatography (PE/EtOAc = 10:1) to give the product as a **white solid** (56.5 mg, 56%). **mp. 90-92 °C**

**<sup>1</sup>H NMR (400 MHz, CDCl<sub>3</sub>):**  $\delta$  = 7.36 (d,  $J$  = 7.6 Hz, 1H), 7.29 (s, 1H), 7.29-7.19 (m, 3H), 2.33 (s, 3H), 1.58 (s, 6H)

**<sup>13</sup>C NMR (100 MHz, CDCl<sub>3</sub>):**  $\delta$  = 171.0, 156.1, 136.0, 131.2, 130.0, 129.1, 129.0, 128.4, 125.4, 83.5, 25.4, 19.9.

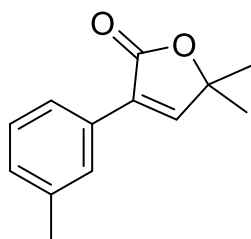

**2d**

**5,5-Dimethyl-3-(m-tolyl)furan-2(5H)-one<sup>3a</sup>**

According to general procedure for reaction, the crude residue was purified by flash chromatography (PE/EtOAc = 10:1) to give the product as a **yellow oil** (60.6mg, 60%).

**<sup>1</sup>H NMR (400 MHz, CDCl<sub>3</sub>):**  $\delta$  = 7.67 (s, 1H), 7.63 (d,  $J$  = 7.6 Hz, 1H), 7.49 (s, 1H), 7.29 (dd,  $J$  = 7.6, 7.6 Hz, 1H), 7.19 (d,  $J$  = 7.6 Hz, 1H), 2.38 (s, 3H), 1.54 (s, 6H).

**<sup>13</sup>C NMR (100 MHz, CDCl<sub>3</sub>):**  $\delta$  = 171.1, 152.9, 138.3, 130.1, 130.0, 129.5, 128.5, 127.7, 124.2, 83.4, 25.8, 21.5.

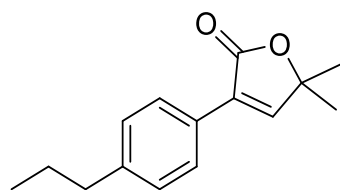

**2e**

**5,5-Dimethyl-3-(4-propylphenyl)furan-2(5H)-one**

According to general procedure for reaction, the crude residue was purified by flash chromatography (PE/EtOAc = 10:1) to give the product as a **white solid** (83.9mg, 73%). **mp. 60-62 °C**

**<sup>1</sup>H NMR (400 MHz, CDCl<sub>3</sub>):**  $\delta$  = 7.77 (d, *J* = 8.0 Hz, 1H), 7.47 (s, 1H), 7.21 (d, *J* = 7.9 Hz, 1H), 2.60 (t, *J* = 7.5 Hz, 1H), 1.64 (dd, *J* = 14.9, 7.4 Hz, 1H), 0.93 (t, *J* = 7.3 Hz, 2H).

**<sup>13</sup>C NMR (100 MHz, CDCl<sub>3</sub>):**  $\delta$  = 171.3, 152.2, 144.1, 129.9, 128.74, 127.0, 83.4, 37.8, 25.8, 24.4, 13.8.

**HRMS (ESI):** [M+H<sup>+</sup>]calcd for C<sub>15</sub>H<sub>19</sub>O<sub>2</sub><sup>+</sup>, 231.1380; found, 231.1385.

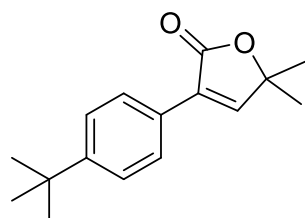

**2f**

**3-(4-(*tert*-Butyl)phenyl)-5,5-dimethylfuran-2(5H)-one<sup>3a</sup>**

According to general procedure for reaction, the crude residue was purified by flash chromatography (PE/EtOAc = 10:1) to give the product as a **white solid** (84.0mg, 75%). **mp. 91-93 °C**

**<sup>1</sup>H NMR (400 MHz, CDCl<sub>3</sub>):**  $\delta$  = 7.81-7.76 (m, 2H), 7.47 (s, 1H), 7.45-7.40 (m, 2H), 1.54 (s, 6H), 1.33 (s, 9H)

**<sup>13</sup>C NMR (100 MHz, CDCl<sub>3</sub>):**  $\delta$  = 170.8, 152.0, 151.8, 129.4, 126.4, 126.3, 125.1, 82.9, 34.2, 30.7, 25.3.

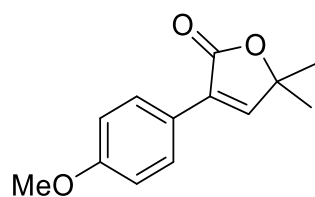

**2g**

**3-(4-Methoxyphenyl)-5,5-dimethylfuran-2(5H)-one<sup>3a</sup>**

According to general procedure for reaction, the crude residue was purified by flash chromatography (PE/EtOAc = 10:1) to give the product as a **yellow solid** (85.0mg, 78%). **mp. 57-59 °C**

**<sup>1</sup>H NMR (400 MHz, CDCl<sub>3</sub>):**  $\delta$  = 7.84-7.80 (m, 2H), 7.38 (s, 1H), 6.94-6.90 (m, 2H), 3.83 (s, 3H), 1.54 (s, 6H).

**<sup>13</sup>C NMR (100 MHz, CDCl<sub>3</sub>):**  $\delta$  = 171.0, 159.8, 150.3, 128.9, 128.0, 121.7, 113.5, 82.8, 54.8, 25.4.

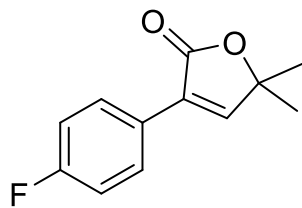

**2h**

**3-(4-Fluorophenyl)-5,5-dimethylfuran-2(5H)-one<sup>3a</sup>**

According to general procedure for reaction, the crude residue was purified by flash chromatography (PE/EtOAc = 5:1) to give the product as a **white solid** (58.7mg, 57%). **mp. 82-84 °C**

<sup>1</sup>H NMR (400 MHz, CDCl<sub>3</sub>): δ = 7.89-7.82 (m, 2H), 7.47 (s, 1H), 7.13-7.05 (m, 2H), 1.55 (s, 6H).

<sup>13</sup>C NMR (100 MHz, CDCl<sub>3</sub>): δ = 170.5, 162.7 (d, *J*<sub>C-F</sub> = 248 Hz), 152.0 (d, *J*<sub>C-F</sub> = 1.6 Hz), 128.6 (d, *J*<sub>C-F</sub> = 8.2 Hz), 128.5, 125.2 (d, *J*<sub>C-F</sub> = 3.4 Hz), 115.2 (d, *J*<sub>C-F</sub> = 21.5 Hz), 83.0, 25.3.

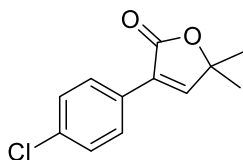

**2i**

**3-(4-Chlorophenyl)-5,5-dimethylfuran-2(5H)-one<sup>3a</sup>**

According to general procedure for reaction, the crude residue was purified by flash chromatography (PE/EtOAc = 5:1) to give the product as a **white solid** (66.6mg, 60%). **mp. 89-91 °C**

<sup>1</sup>H NMR (400 MHz, CDCl<sub>3</sub>): δ = 7.82-7.79 (m, 2H), 7.52 (s, 1H), 7.39-7.36 (m, 2H), 1.56 (s, 6H).

<sup>13</sup>C NMR (100 MHz, CDCl<sub>3</sub>): δ = 170.4, 152.7, 134.8, 128.5, 128.4, 127.9, 127.5, 83.1, 25.2.

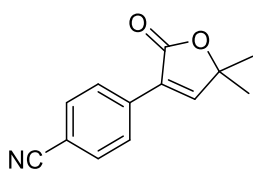

**2j**

**4-(5,5-Dimethyl-2-oxo-2,5-dihydrofuran-3-yl)benzonitrile**

According to general procedure for reaction, the crude residue was purified by flash chromatography (PE/EtOAc = 2:1) to give the product as a **white solid** (66.0mg, 62%). **mp. 165-167 °C**

<sup>1</sup>H NMR (400 MHz, CDCl<sub>3</sub>): δ = 8.04 (d, *J* = 1.6 Hz, 1H), 8.02 (d, *J* = 1.9 Hz, 2H), 7.75 (d, *J* = 1.7 Hz, 1H), 7.73 (d, *J* = 1.8 Hz, 1H), 7.71 (s, 1H), 1.62 (s, 6H).

<sup>13</sup>C NMR (100 MHz, CDCl<sub>3</sub>): δ = 173.5, 158.9, 137.2, 135.7, 134.7, 132.0, 131.0, 121.7, 116.1, 87.2, 28.9.

**HRMS (ESI):** [M+H<sup>+</sup>]calcd for C<sub>13</sub>H<sub>11</sub>NO<sub>2</sub><sup>+</sup>, 214.0863; found, 214.0849.

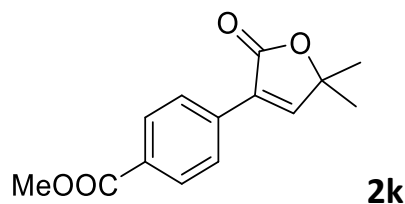

### Methyl 4-(5,5-dimethyl-2-oxo-2,5-dihydrofuran-3-yl)benzoate

According to general procedure for reaction, the crude residue was purified by flash chromatography (PE/EtOAc = 2:1) to give the product as a **white solid** (98.4mg, 80%). **mp. 135-137 °C**

**<sup>1</sup>H NMR (400 MHz, CDCl<sub>3</sub>):** δ = 8.02 (d, *J* = 7.9 Hz, 2H), 7.90 (d, *J* = 8.2 Hz, 2H), 7.63 (s, 1H), 3.89 (s, 3H), 1.53 (s, 6H).

**<sup>13</sup>C NMR (100 MHz, CDCl<sub>3</sub>):** δ = 170.6, 166.5, 154.9, 133.9, 130.5, 129.8, 129.2, 127.0, 83.7, 52.2, 25.6.

**HRMS (ESI):** [M+H<sup>+</sup>]calcd for C<sub>14</sub>H<sub>15</sub>O<sub>4</sub><sup>+</sup>, 247.0965; found, 247.0974.

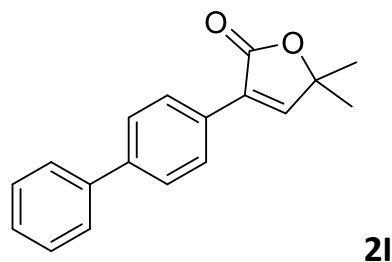

### 3-([1,1'-Biphenyl]-4-yl)-5,5-dimethylfuran-2(5H)-one

According to general procedure for reaction, the crude residue was purified by flash chromatography (PE/EtOAc = 10:1) to give the product as a **yellow solid** (108.4mg, 82%). **mp. 148-150 °C**

**<sup>1</sup>H NMR (400 MHz, CDCl<sub>3</sub>):** δ = 7.95 (d, *J* = 8.4 Hz, 2H), 7.71 – 7.58 (m, 4H), 7.55 (s, 1H), 7.46 (t, *J* = 7.5 Hz, 2H), 7.37 (t, *J* = 7.3 Hz, 1H), 1.57 (s, 6H).

**<sup>13</sup>C NMR (100 MHz, CDCl<sub>3</sub>):** δ = 171.1, 152.7, 142.0, 140.3, 129.7, 128.9, 128.5, 127.7, 127.5, 127.3, 127.0, 83.5, 25.8.

**HRMS (ESI):** [M+H<sup>+</sup>]calcd for C<sub>18</sub>H<sub>17</sub>O<sub>2</sub><sup>+</sup>, 265.1223; found, 265.1229.

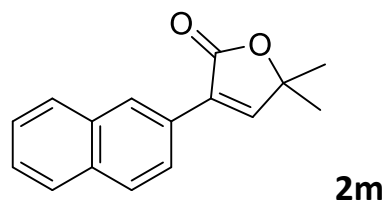

### 5,5-Dimethyl-3-(naphthalen-2-yl)furan-2(5H)-one<sup>3a</sup>

According to general procedure for reaction, the crude residue was purified by flash chromatography (PE/EtOAc = 10:1) to give the product as a **white solid** (101.2mg, 85%). **mp. 106-108 °C**

**<sup>1</sup>H NMR (400 MHz, CDCl<sub>3</sub>):** δ = 8.59 (s, 1H), 7.94-7.88 (m, 1H), 7.85 (d, *J* = 8.8 Hz,

1H), 7.83-7.79 (m, 1H), 7.76 (dd,  $J = 8.8, 2.0$  Hz, 1H), 7.61 (s, 1H), 7.52-7.47 (m, 2H), 1.58 (s, 6H).

$^{13}\text{C}$  NMR (100 MHz,  $\text{CDCl}_3$ ):  $\delta = 170.7, 152.5, 132.9, 132.7, 129.3, 128.3, 127.8, 127.1, 126.5, 126.4, 126.3, 126.0, 123.7, 83.0, 25.3$ .

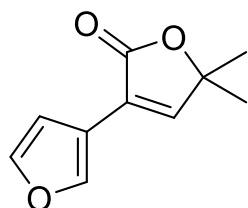

**2n**

#### 5,5-Dimethyl-[3,3'-bifuran]-2(5H)-one

According to general procedure for reaction, the crude residue was purified by flash chromatography (PE/EtOAc = 10:1) to give the product as a **yellow oil** (66.7mg, 75%).

$^1\text{H}$  NMR (400 MHz,  $\text{CDCl}_3$ ):  $\delta = 8.22$  (s, 1H), 7.48 (t,  $J = 1.6$  Hz, 1H), 7.28 (s, 1H), 6.63 – 6.61 (m, 1H), 1.56 (s, 6H).

$^{13}\text{C}$  NMR (100 MHz,  $\text{CDCl}_3$ ):  $\delta = 171.1, 149.7, 143.4, 142.5, 123.8, 115.2, 108.2, 84.9, 25.8$ .

HRMS (ESI):  $[\text{M}+\text{H}^+]$ calcd for  $\text{C}_{10}\text{H}_{11}\text{O}_3^+$ , 179.0703; found, 179.0704.

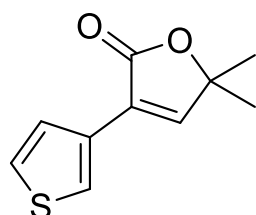

**2o**

#### 5,5-Dimethyl-3-(thiophen-3-yl)furan-2(5H)-one

According to general procedure for reaction, the crude residue was purified by flash chromatography (PE/EtOAc = 10:1) to give the product as a **white solid** (46.5mg, 48%). mp. 102-104 °C

$^1\text{H}$  NMR (400 MHz,  $\text{CDCl}_3$ ):  $\delta = 8.15$  (d,  $J = 1.1$  Hz, 1H), 7.35 (d,  $J = 1.8$  Hz, 2H), 7.34 (s, 1H), 1.53 (s, 6H).

$^{13}\text{C}$  NMR (100 MHz,  $\text{CDCl}_3$ ):  $\delta = 171.1, 150.5, 130.3, 126.1, 125.9, 125.7, 125.2, 84.0, 25.8$ .

HRMS (ESI):  $[\text{M}+\text{H}^+]$ calcd for  $\text{C}_{10}\text{H}_{11}\text{O}_3^+$ , 195.0474; found, 195.0479.



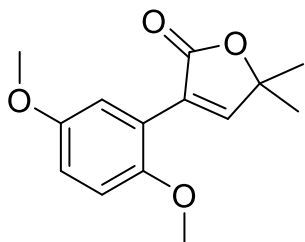

**2p**

**3-(2,5-Dimethoxyphenyl)-5,5-dimethylfuran-2(5H)-one**

According to general procedure for reaction, the crude residue was purified by flash chromatography (PE/EtOAc = 5:1) to give the product as a **yellow oil** (62.0mg, 50%).

**<sup>1</sup>H NMR (400 MHz, CDCl<sub>3</sub>):**  $\delta$  = 7.90 (s, 2H), 6.88 (s, 2H), 3.84 (s, 3H), 3.81 (s, 3H), 1.54 (s, 6H).

**<sup>13</sup>C NMR (100 MHz, CDCl<sub>3</sub>):**  $\delta$  = 171.8, 157.4, 153.4, 152.2, 124.8, 119.1, 115.6, 114.6, 111.9, 83.1, 55.9, 55.8, 25.7.

**HRMS (ESI):** [M+H<sup>+</sup>]calcd for C<sub>14</sub>H<sub>17</sub>O<sub>4</sub><sup>+</sup>, 249.1121; found, 249.1123.

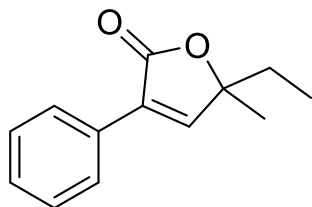

**2q**

**5-Ethyl-5-methyl-3-phenylfuran-2(5H)-one**

According to general procedure for reaction, the crude residue was purified by flash chromatography (PE/EtOAc = 10:1) to give the product as a **yellow oil** (76.7mg, 76%). **mp. 69-71 °C**

**<sup>1</sup>H NMR (400 MHz, CDCl<sub>3</sub>):**  $\delta$  = 7.90 (dd,  $J$  = 7.2, 1.0 Hz, 2H), 7.51 (s, 1H), 7.47 – 7.39 (m, 3H), 1.98 – 1.83 (m, 2H), 1.55 (s, 3H), 0.96 (t,  $J$  = 7.5 Hz, 3H).

**<sup>13</sup>C NMR (100 MHz, CDCl<sub>3</sub>):**  $\delta$  = 171.3, 152.1, 130.9, 129.7, 129.2, 128.6, 127.1, 86.1, 31.7, 23.8, 8.2.

**HRMS (ESI):** [M+H<sup>+</sup>]calcd for C<sub>13</sub>H<sub>15</sub>O<sub>2</sub><sup>+</sup>, 203.1067; found, 203.1070.

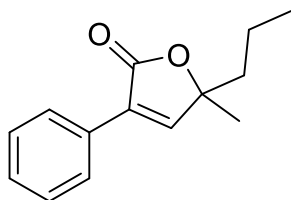

**2r**

**5-Methyl-3-phenyl-5-propylfuran-2(5H)-one**

According to general procedure for reaction, the crude residue was purified by flash chromatography (PE/EtOAc = 10:1) to give the product as a **yellow oil** (79.9mg, 74%).

**<sup>1</sup>H NMR (400 MHz, CDCl<sub>3</sub>):** δ = 7.85 (d, *J* = 6.6 Hz, 2H), 7.47 (s, 1H), 7.38-7.42 (m, *J* = 7.6 Hz, 3H), 1.94 – 1.70 (m, 2H), 1.52 (s, 3H), 1.44 – 1.25 (m, 2H), 0.92 (t, *J* = 7.3 Hz, 3H).

**<sup>13</sup>C NMR (100 MHz, CDCl<sub>3</sub>):** δ = 171.3, 152.2, 130.6, 129.7, 129.2, 128.6, 127.1, 85.0, 40.9, 24.3, 17.3, 14.2.

**HRMS (ESI):** [M+H<sup>+</sup>]calcd for C<sub>14</sub>H<sub>17</sub>O<sub>2</sub><sup>+</sup>, 217.1223; found, 217.1225.

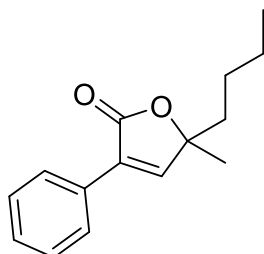

**2s**

#### **5-Butyl-5-methyl-3-phenylfuran-2(5H)-one**

According to general procedure for reaction, the crude residue was purified by flash chromatography (PE/EtOAc = 10:1) to give the product as a **brown oil** (82.8mg, 72%).

**<sup>1</sup>H NMR (400 MHz, CDCl<sub>3</sub>):** δ = 7.85 (d, *J* = 6.5 Hz, 2H), 7.47 (s, 1H), 7.43 – 7.35 (m, 3H), 1.89 – 1.74 (m, 2H), 1.52 (s, 3H), 1.38 – 1.23 (m, 4H), 0.89 (t, *J* = 6.9 Hz, 3H).

**<sup>13</sup>C NMR (100 MHz, CDCl<sub>3</sub>):** δ = 171.3, 152.2, 130.7, 129.7, 129.1, 128.6, 127.1, 85.8, 38.5, 26.0, 24.3, 22.8, 13.9.

**HRMS (ESI):** [M+H<sup>+</sup>]calcd for C<sub>15</sub>H<sub>19</sub>O<sub>2</sub><sup>+</sup>, 231.1380; found, 231.1384.

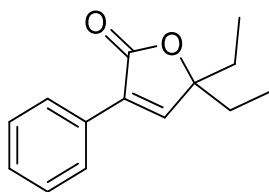

**2t**

#### **5,5-Diethyl-3-phenylfuran-2(5H)-one**

According to general procedure for reaction, the crude residue was purified by flash chromatography (PE/EtOAc = 10:1) to give the product as a **yellow oil** (88.5mg, 82%).

**<sup>1</sup>H NMR (400 MHz, CDCl<sub>3</sub>):** δ = 7.86 (d, *J* = 4.6 Hz, 2H), 7.41 (s, 1H), 7.40 – 7.38 (m, 3H), 1.98 – 1.78 (m, 4H), 0.90 (t, *J* = 7.5 Hz, 6H).

**<sup>13</sup>C NMR (100 MHz, CDCl<sub>3</sub>):** δ = 171.5, 150.8, 131.9, 129.7, 129.2, 128.6, 127.1, 88.8, 30.0, 7.9.

**HRMS (ESI):** [M+H<sup>+</sup>]calcd for C<sub>14</sub>H<sub>17</sub>O<sub>2</sub><sup>+</sup>, 217.1223; found, 217.1230.

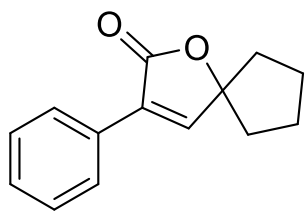

**2u**

### 3-Phenyl-1-oxaspiro[4.4]non-3-en-2-one

According to general procedure for reaction, the crude residue was purified by flash chromatography (PE/EtOAc = 10:1) to give the product as a **yellow solid** (55.6mg, 52%). **mp. 64-66 °C**

**<sup>1</sup>H NMR (400 MHz, CDCl<sub>3</sub>):**  $\delta$  = 7.85 (d, *J* = 4.5 Hz, 2H), 7.48 (s, 1H), 7.42 – 7.34 (m, 3H), 2.10 – 1.80 (m, 8H).

**<sup>13</sup>C NMR (100 MHz, CDCl<sub>3</sub>):**  $\delta$  = 171.2, 150.8, 130.4, 129.7, 129.1, 128.6, 127.0, 93.8, 37.2, 24.7.

**HRMS (ESI):** [M+H<sup>+</sup>]calcd for C<sub>14</sub>H<sub>15</sub>O<sub>2</sub><sup>+</sup>, 215.1067; found, 215.1070.

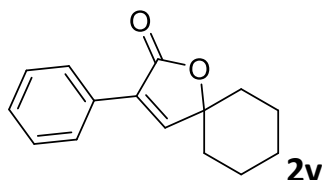

**2v**

### 3-Phenyl-1-oxaspiro[4.5]dec-3-en-2-one<sup>3b</sup>

According to general procedure for reaction, the crude residue was purified by flash chromatography (PE/EtOAc = 10:1) to give the product as a **white solid** (82.1mg, 72%). **mp. 97-99 °C**

**<sup>1</sup>H NMR (400 MHz, CDCl<sub>3</sub>):**  $\delta$  = 7.84–7.87(m, 2H), 7.57 (s, 1H), 7.34–7.43 (m, 3H), 1.67–1.87 (m, 9H), 1.36–1.45 (m, 1H).

**<sup>13</sup>C NMR (100 MHz, CDCl<sub>3</sub>):**  $\delta$  = 171.1, 152.4, 130.1, 129.7, 129.0, 128.5, 127.0, 85.3, 34.8, 24.6, 22.4.

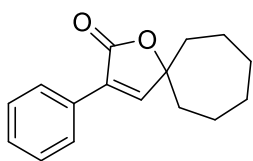

**2w**

### 3-Phenyl-1-oxaspiro[4.6]undec-3-en-2-one

According to general procedure for reaction, the crude residue was purified by flash chromatography (PE/EtOAc = 10:1) to give the product as a **white solid** (72.6mg, 60%). **mp. 100-102 °C**

**<sup>1</sup>H NMR (400 MHz, CDCl<sub>3</sub>):**  $\delta$  = 7.84 (d, *J* = 6.5 Hz, 2H), 7.59 (s, 1H), 7.42 – 7.33 (m, 3H), 2.03 – 1.55 (m, 12H).

**<sup>13</sup>C NMR (100 MHz, CDCl<sub>3</sub>):**  $\delta$  = 171.2, 153.4, 129.8, 129.3, 129.1, 128.6, 127.1, 88.7, 38.0, 28.9, 22.8.

**HRMS (ESI):** [M+H<sup>+</sup>]calcd for C<sub>16</sub>H<sub>19</sub>O<sub>2</sub><sup>+</sup>, 243.1380; found, 243.1382.

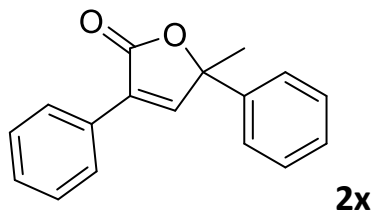

**5-Methyl-3,5-diphenylfuran-2(5H)-one<sup>3a</sup>**

According to general procedure for reaction, the crude residue was purified by flash chromatography (PE/EtOAc = 10:1) to give the product as a **white solid** (76.2mg, 61%). **mp. 73-75 °C**

**<sup>1</sup>H NMR (400 MHz, CDCl<sub>3</sub>):**  $\delta$  = 7.88-7.84 (m, 2H), 7.74 (s, 1H), 7.46-7.42 (m, 2H), 7.41-7.35 (m, 5H), 7.34-7.31 (m, 1H), 1.88 (s, 3H)

**<sup>13</sup>C NMR (100 MHz, CDCl<sub>3</sub>):**  $\delta$  = 171.1, 152.1, 139.8, 129.4, 129.3, 128.9, 128.7, 128.3, 127.2, 124.9, 85.9, 26.7.

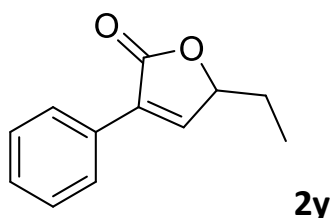

**5-Ethyl-3-phenylfuran-2(5H)-one<sup>3b</sup>**

According to general procedure for reaction, the crude residue was purified by flash chromatography (PE/EtOAc = 10:1) to give the product as a **brown oil** (65.8mg, 70%).

**<sup>1</sup>H NMR (400 MHz, CDCl<sub>3</sub>):**  $\delta$  = 7.85 (d,  $J$  = 6.3 Hz, 1H), 7.55 (s, 1H), 7.41 – 7.37 (m, 3H), 5.04 – 4.86 (m, 1H), 1.95 – 1.73 (m, 2H), 1.06 (t,  $J$  = 7.4 Hz, 4H).

**<sup>13</sup>C NMR (100 MHz, CDCl<sub>3</sub>):**  $\delta$  = 171.7, 147.7, 131.8, 129.6, 129.3, 128.6, 127.0, 81.5, 26.7, 9.2.

## 7. References

- (a) J. Ying, C. Zhou and X.-F. Wu, *Org. Biomol. Chem.*, 2018, **16**, 1065-1067; (b) A. Caporale, S. Tartaglia, A. Castellin and O.D. Lucchi, *Beilstein. J. Org. Chem.*, 2014, **10**, 384-393.
- (a) L. Jiang, X. Qi and X.-F. Wu, *Tetrahedron*, 2016, **57**, 3368-3370; (b) L. Jiang, R. Li, C. Zhou, X. Qi, J.-B. Peng and X.-F. Wu, *Mol. Catal.*, 2017, **433**, 8-11.
- (a) W.-B Mao and C. Zhu, *Org. Lett.*, 2015, **17**, 5710-5713; (b) J. L. Nallasivam and R. A. Fernandes. *Eur. J. Org. Chem.*, 2015, 3391-3608.

## 8. Spectra of TFBen and Substrates

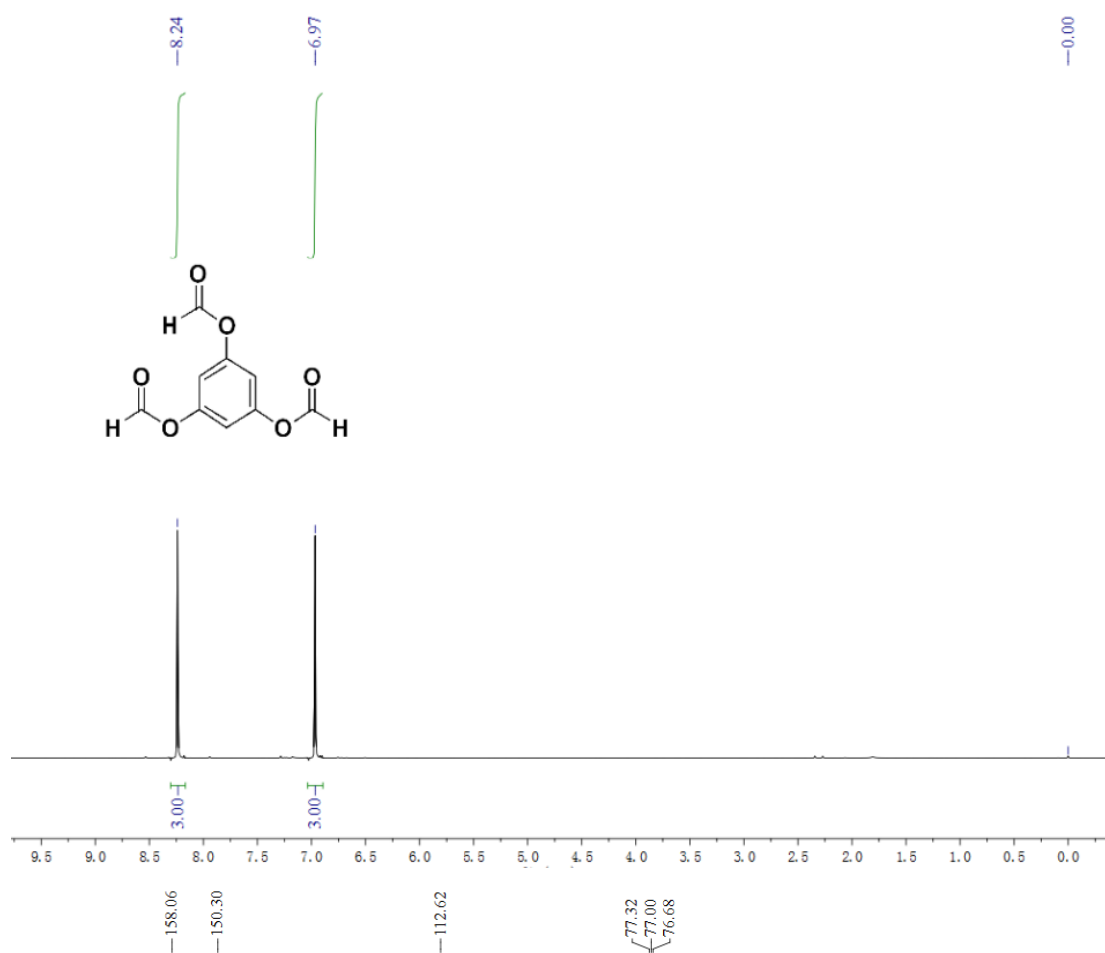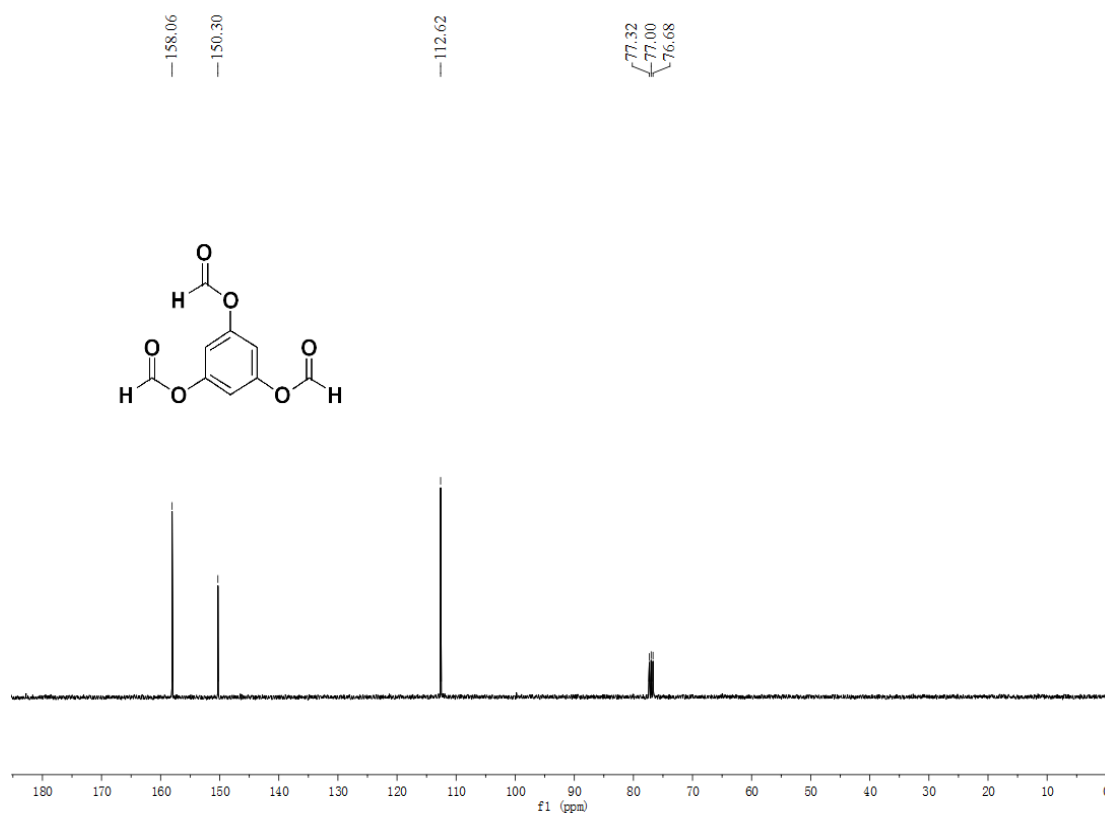

# 1a

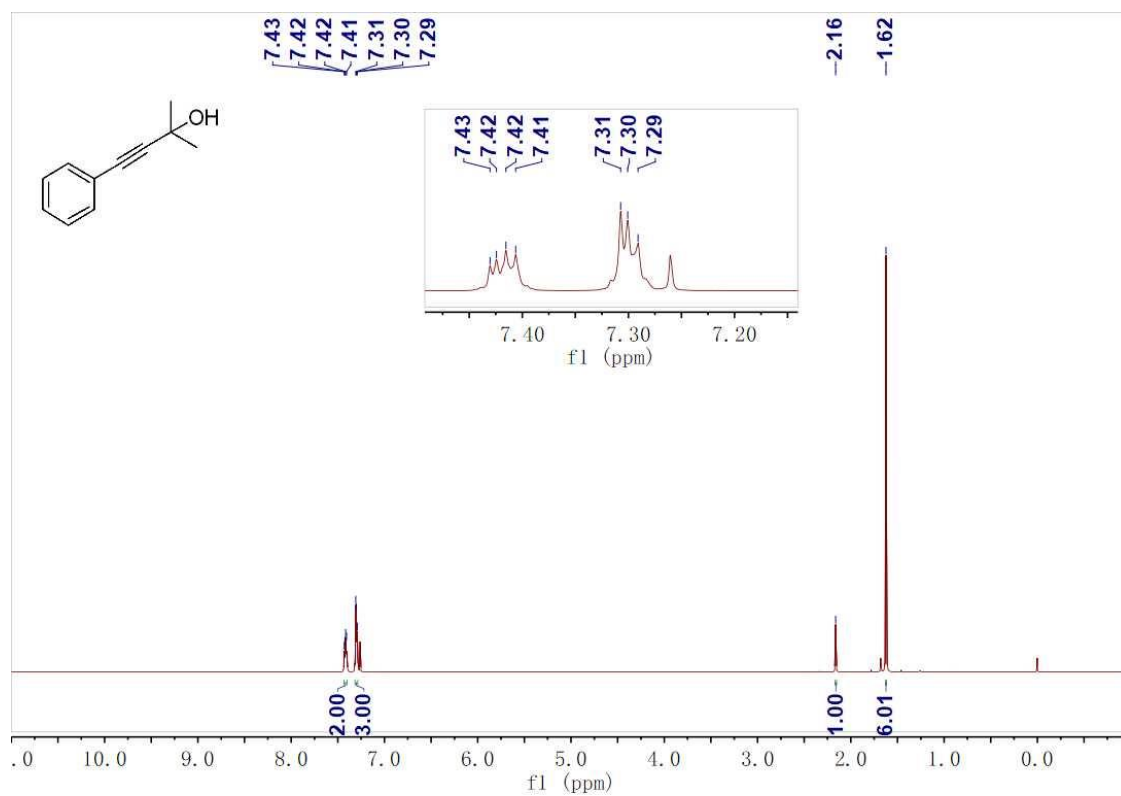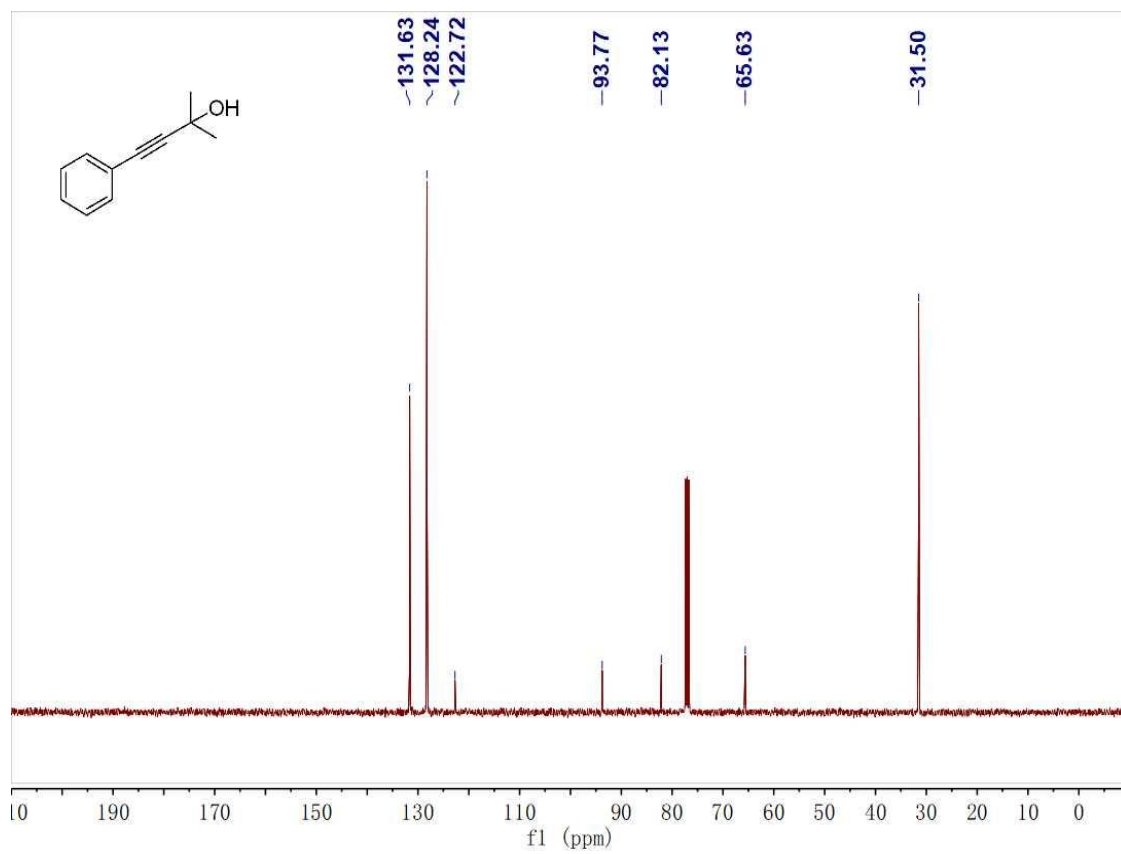

# 1b

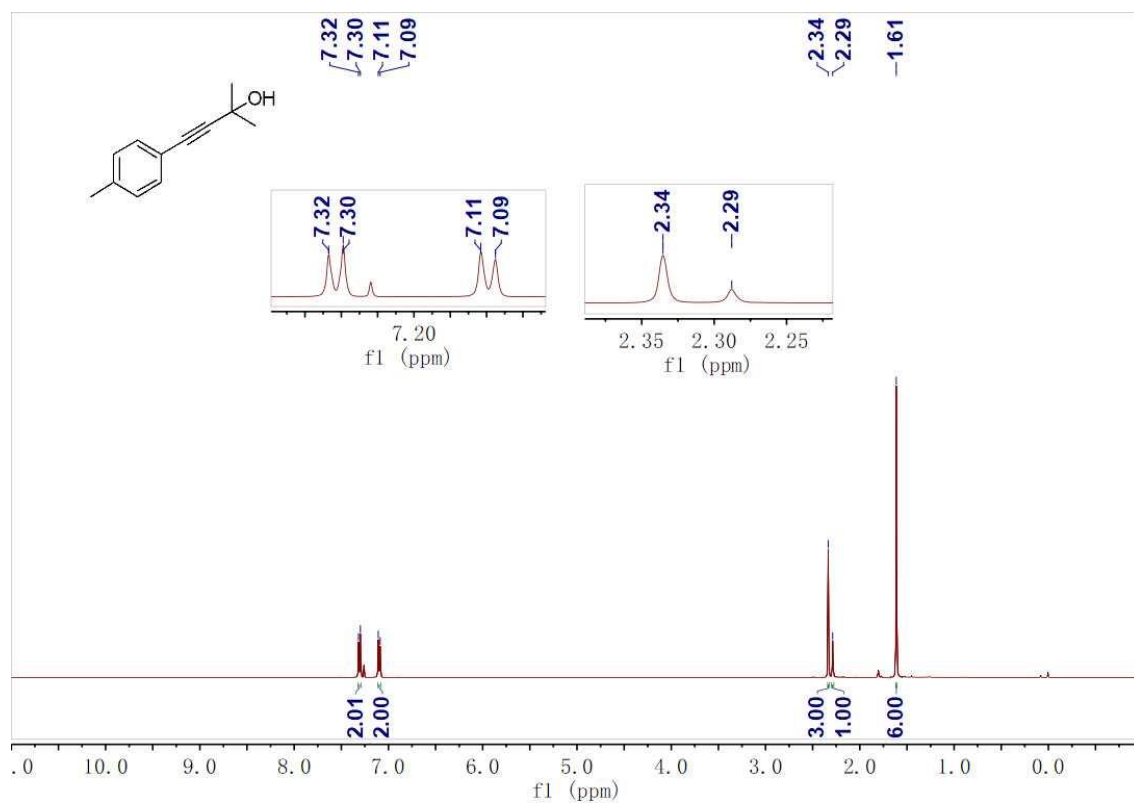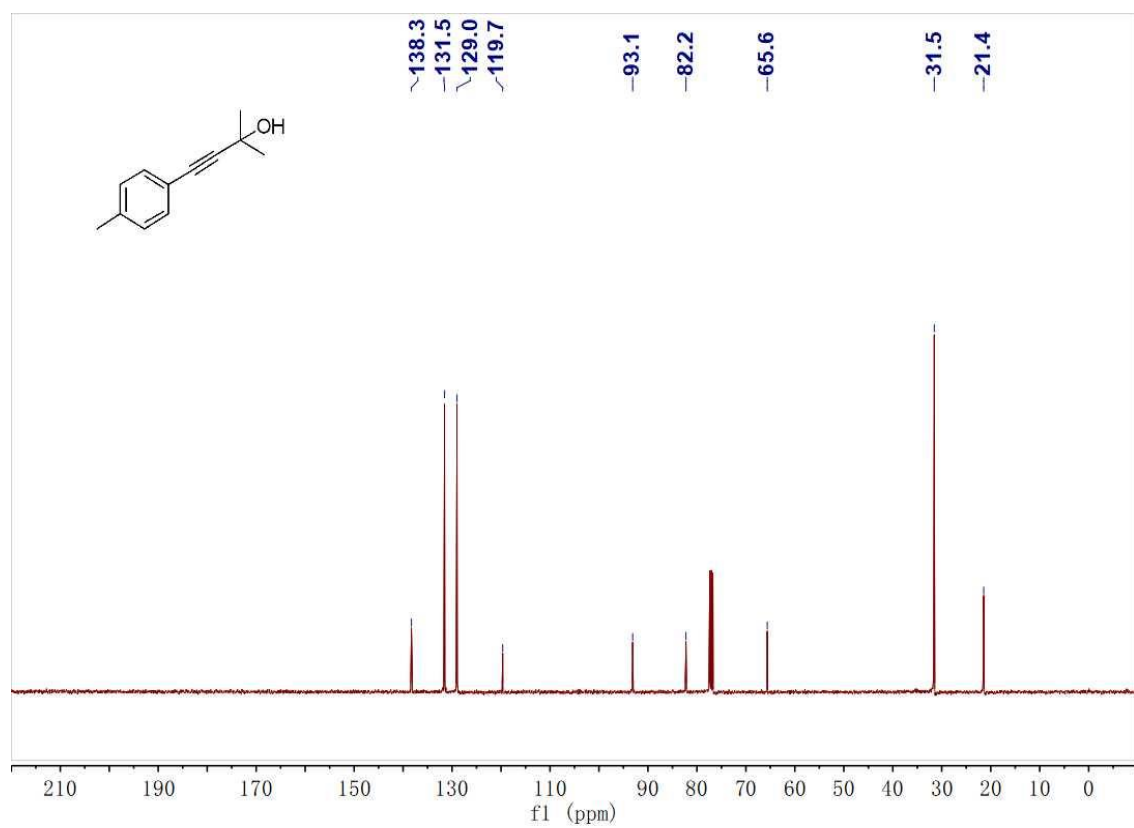

**1c**

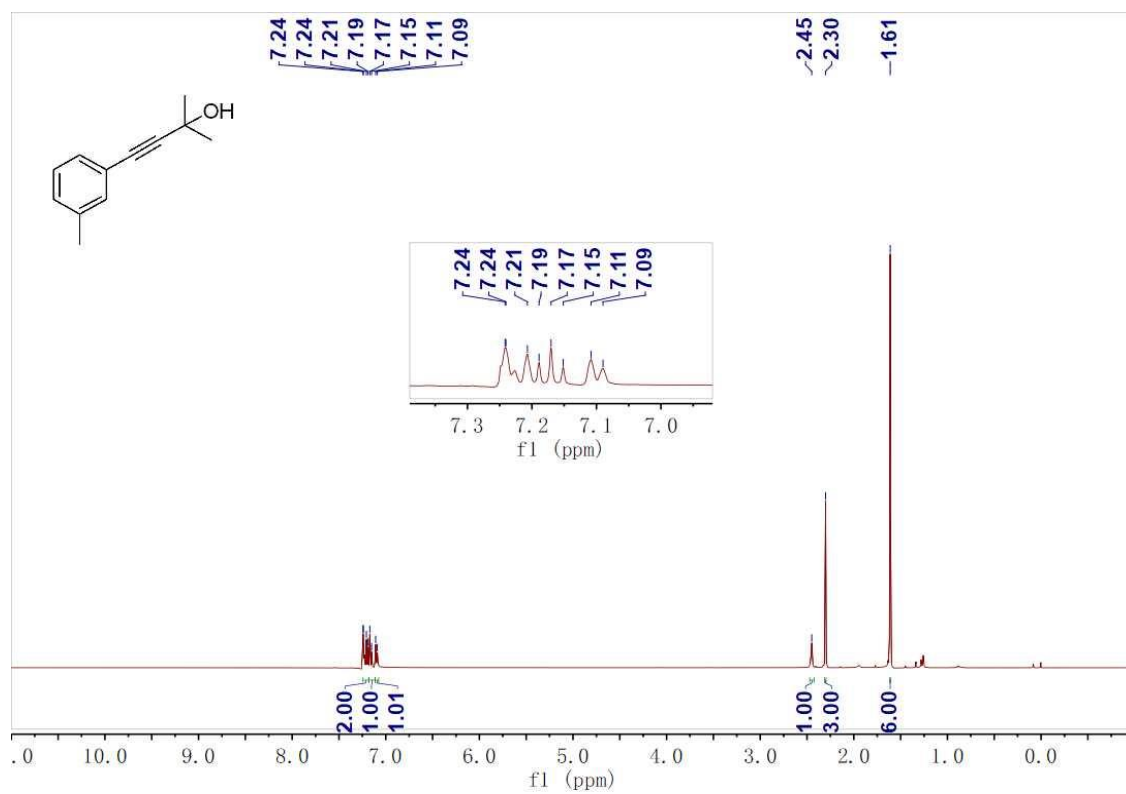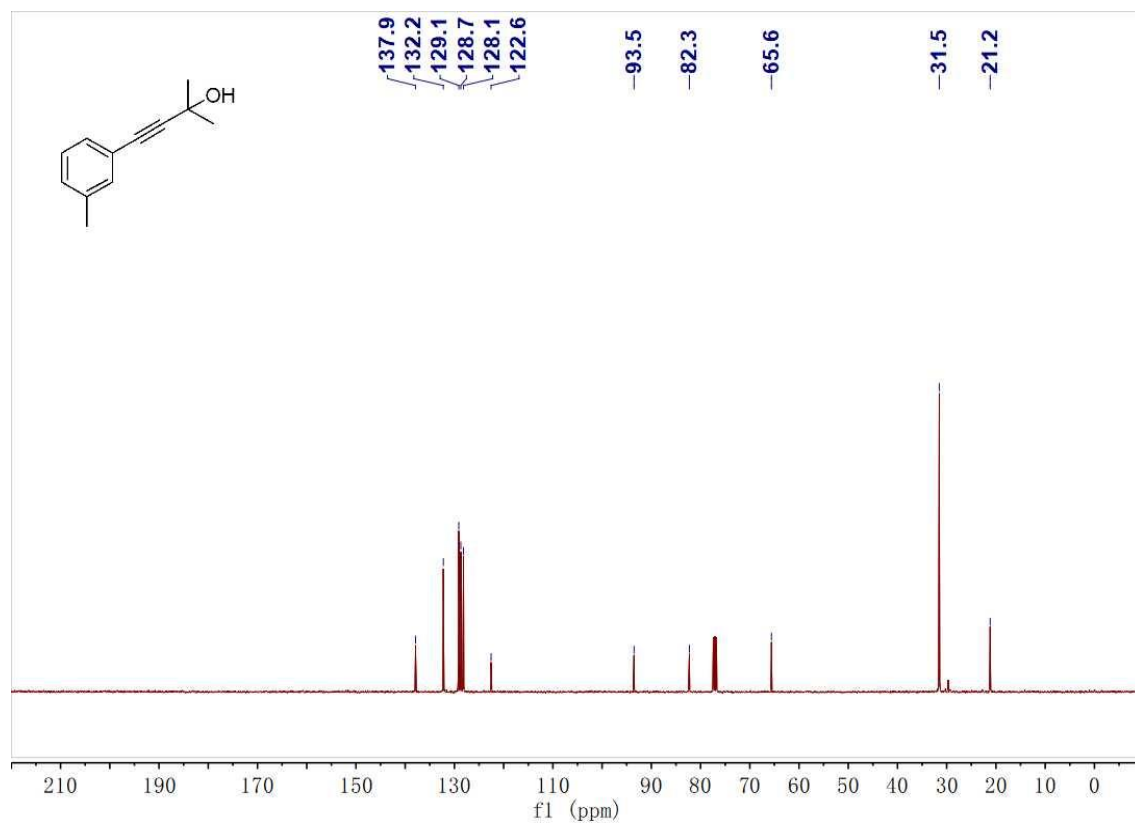



# 1d

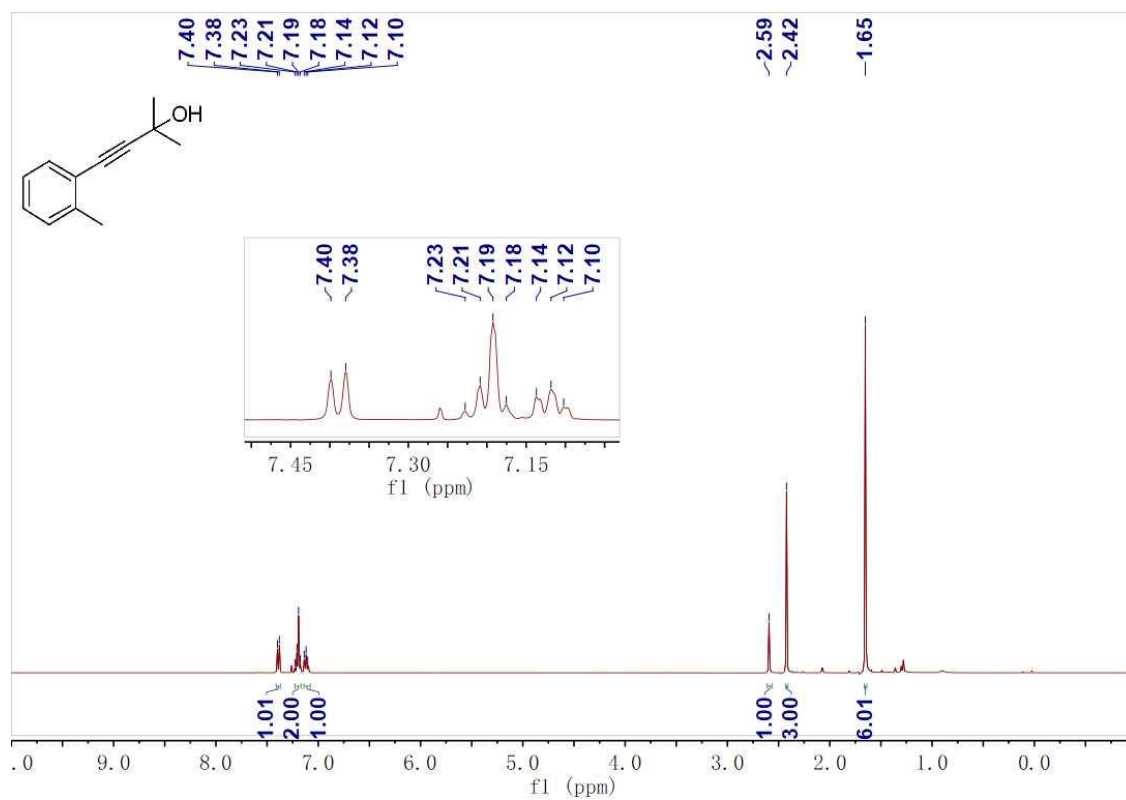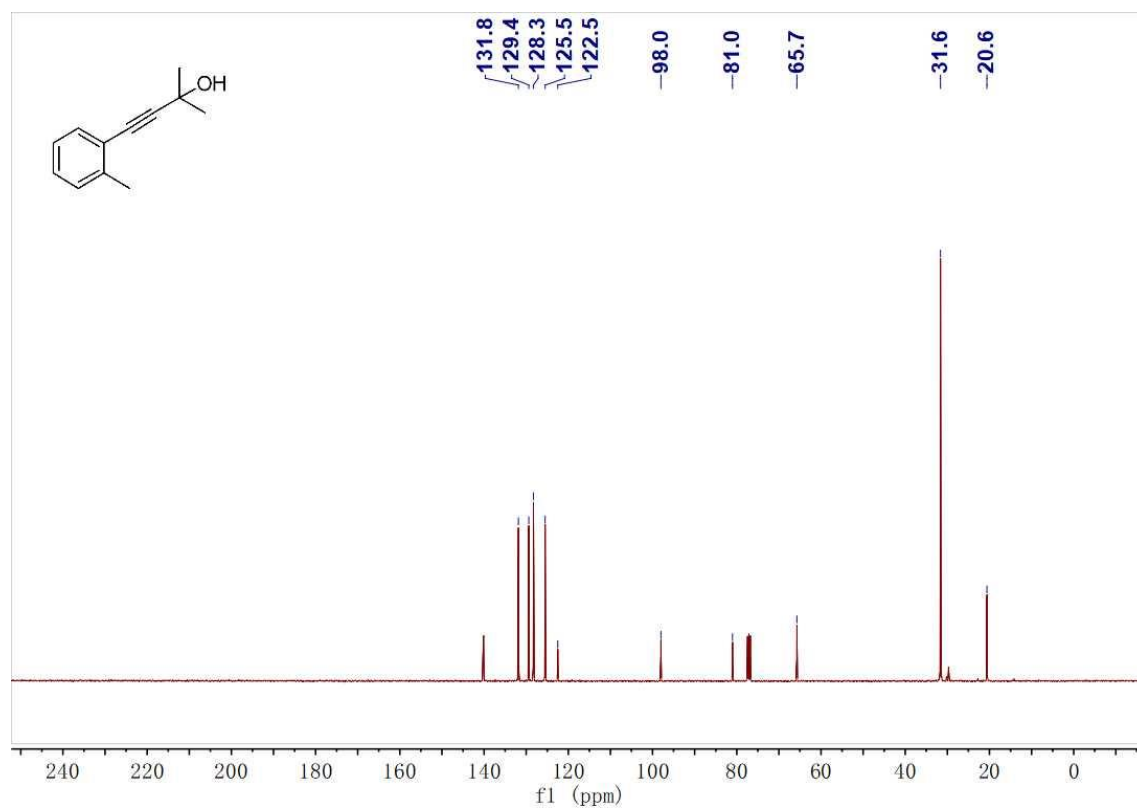

1e

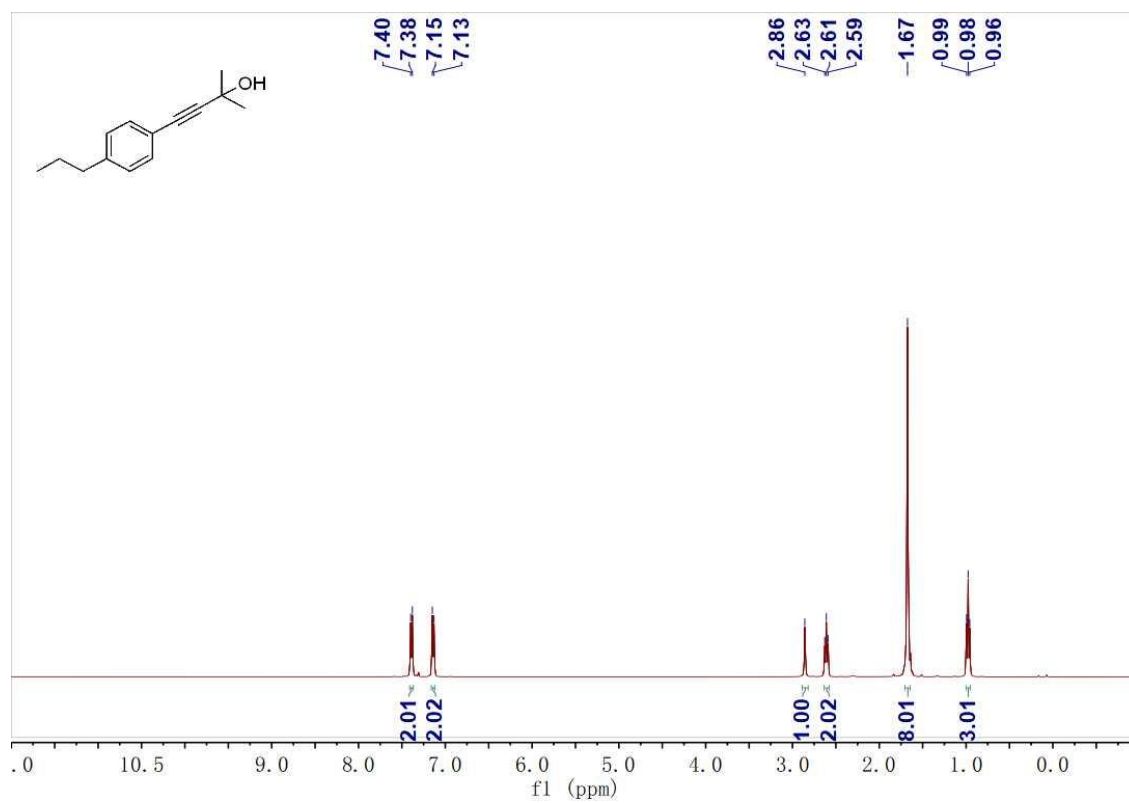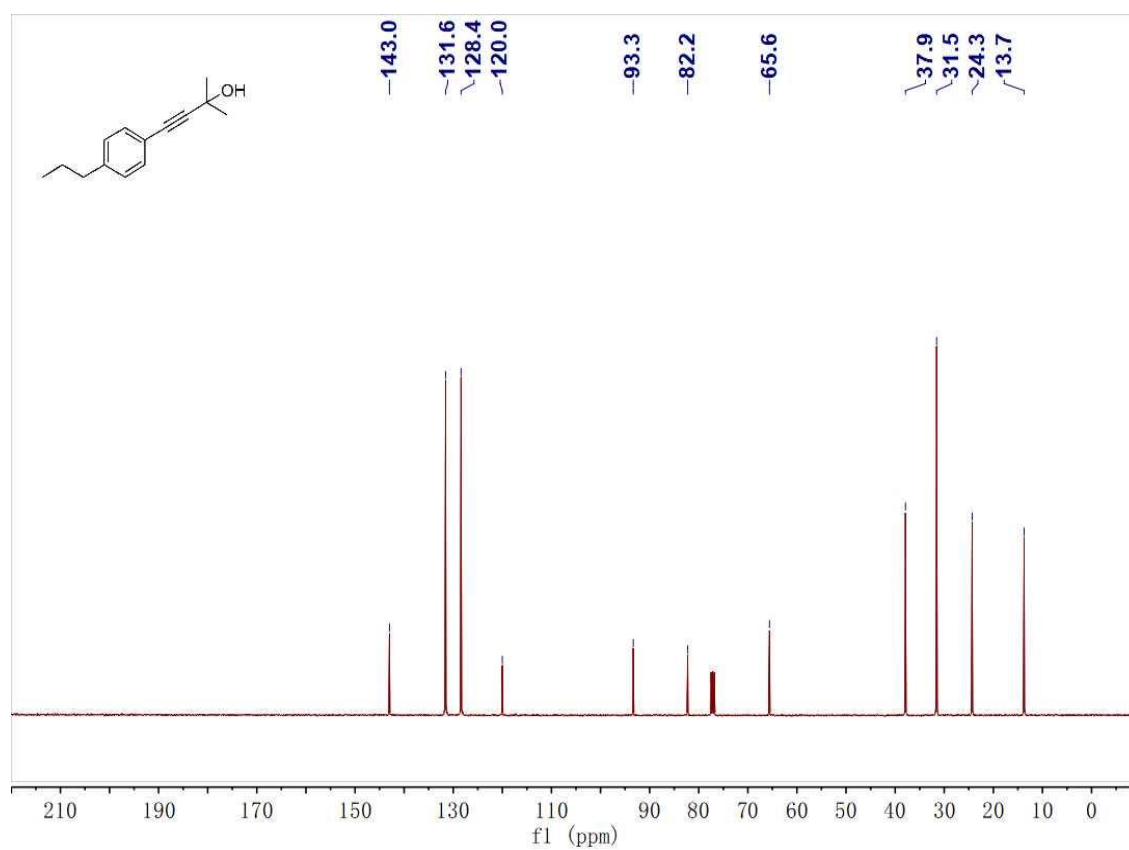

1f

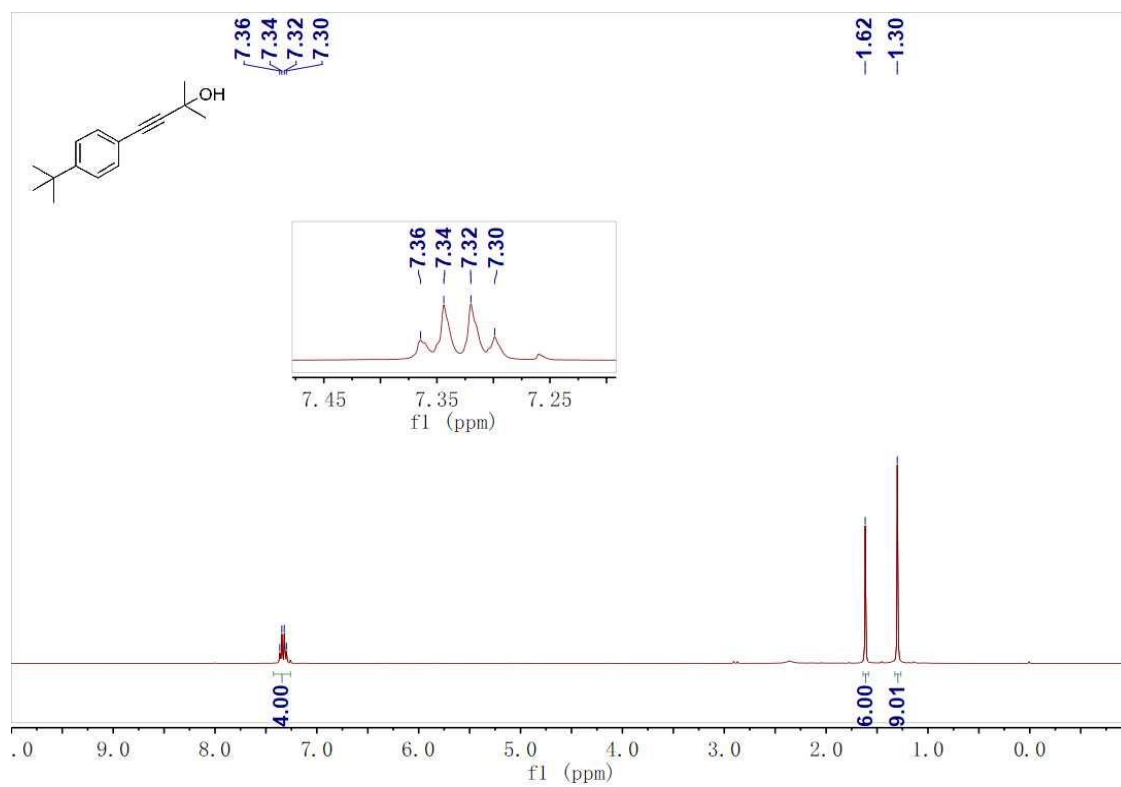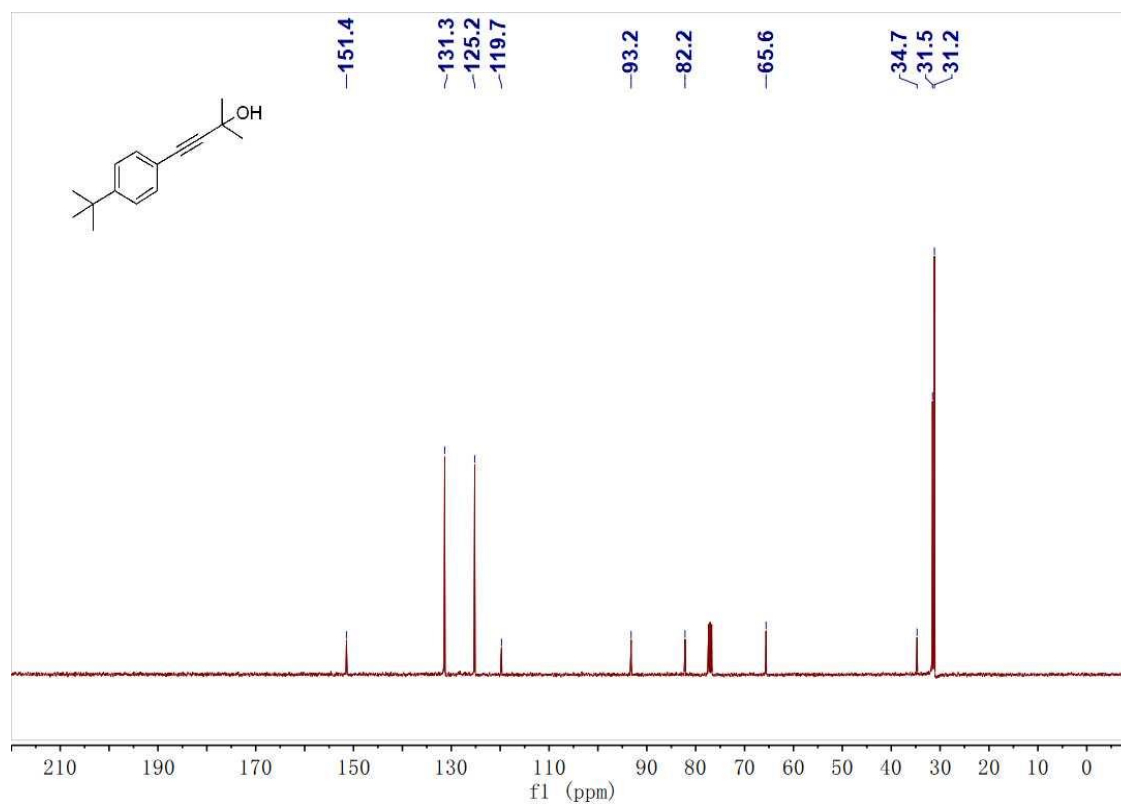

1g

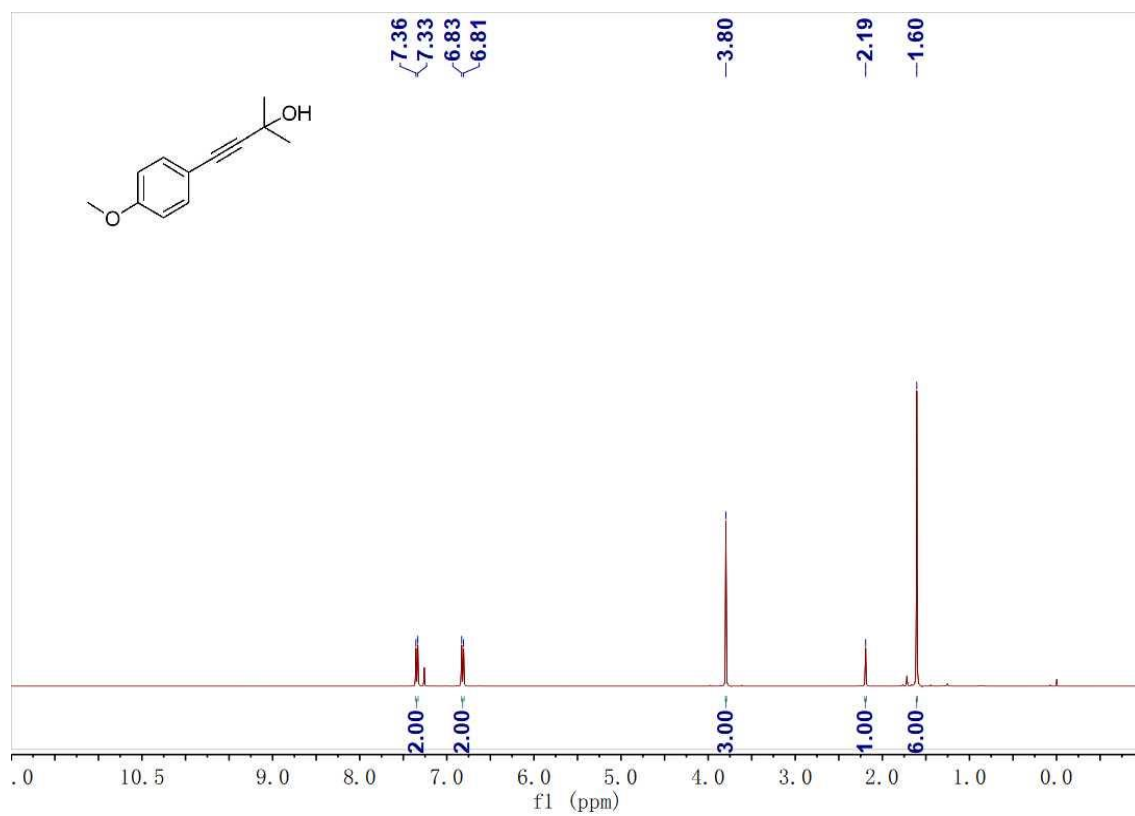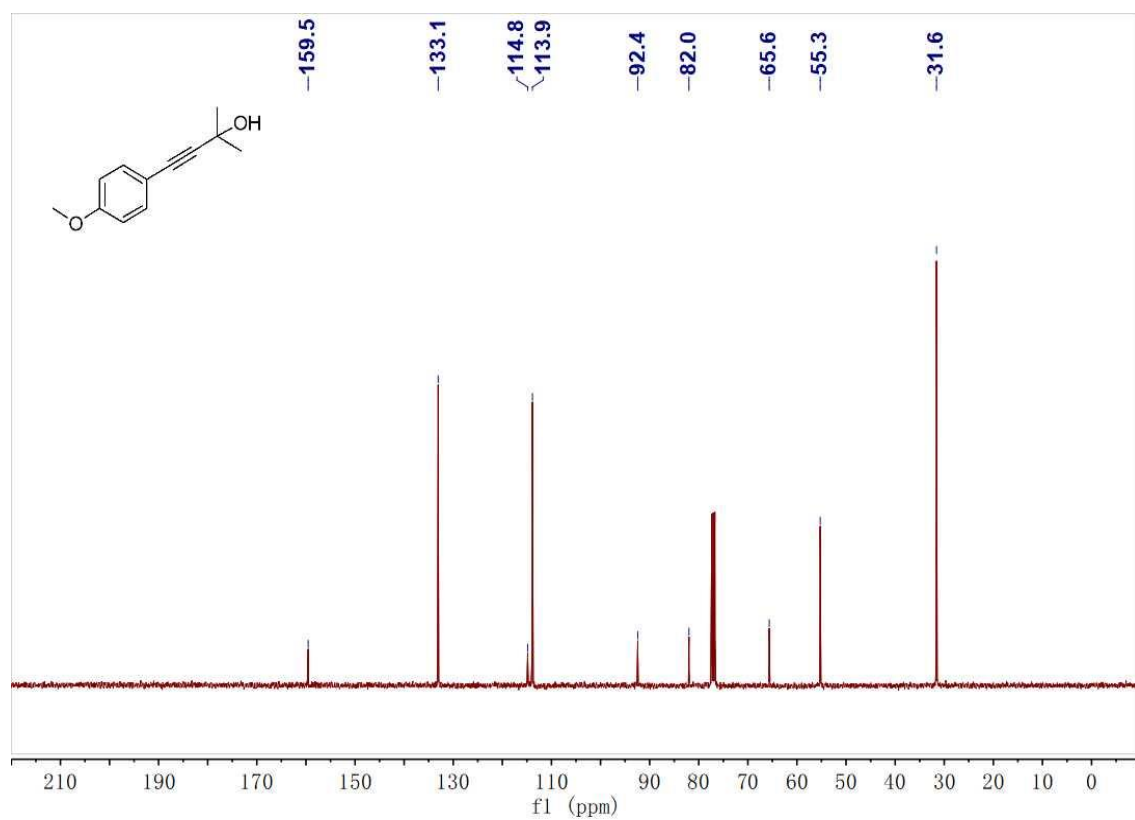

# 1h

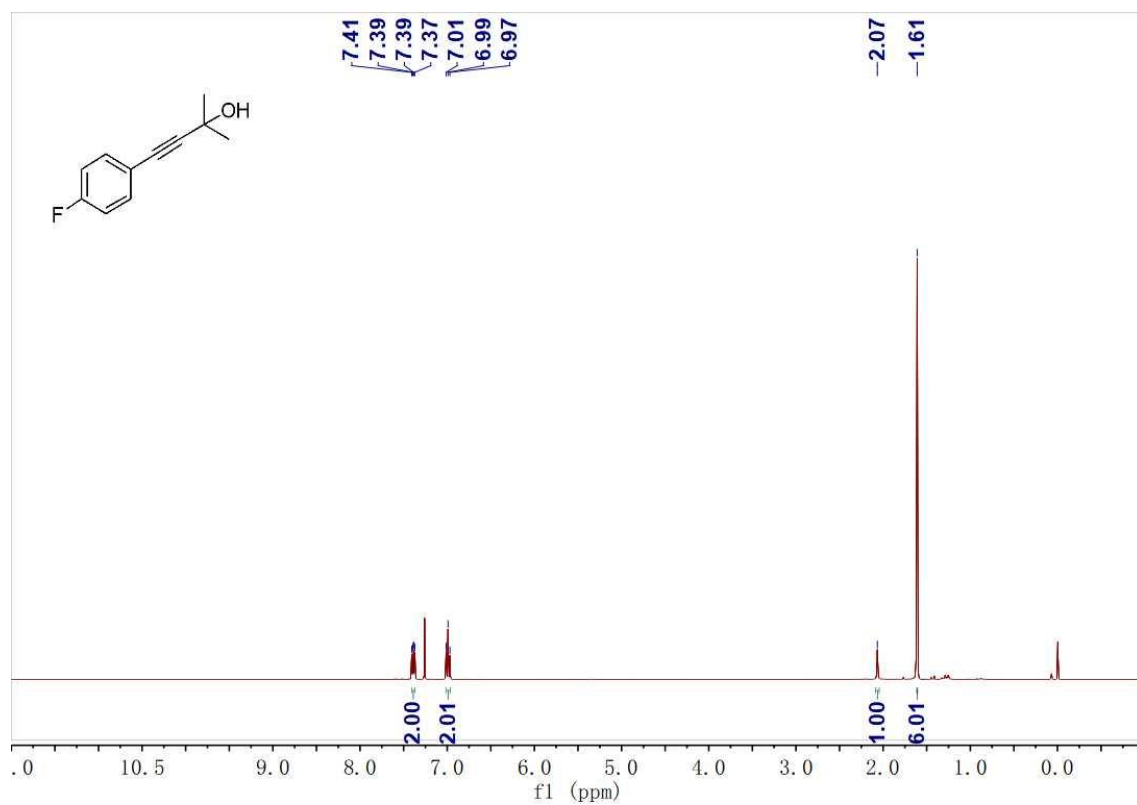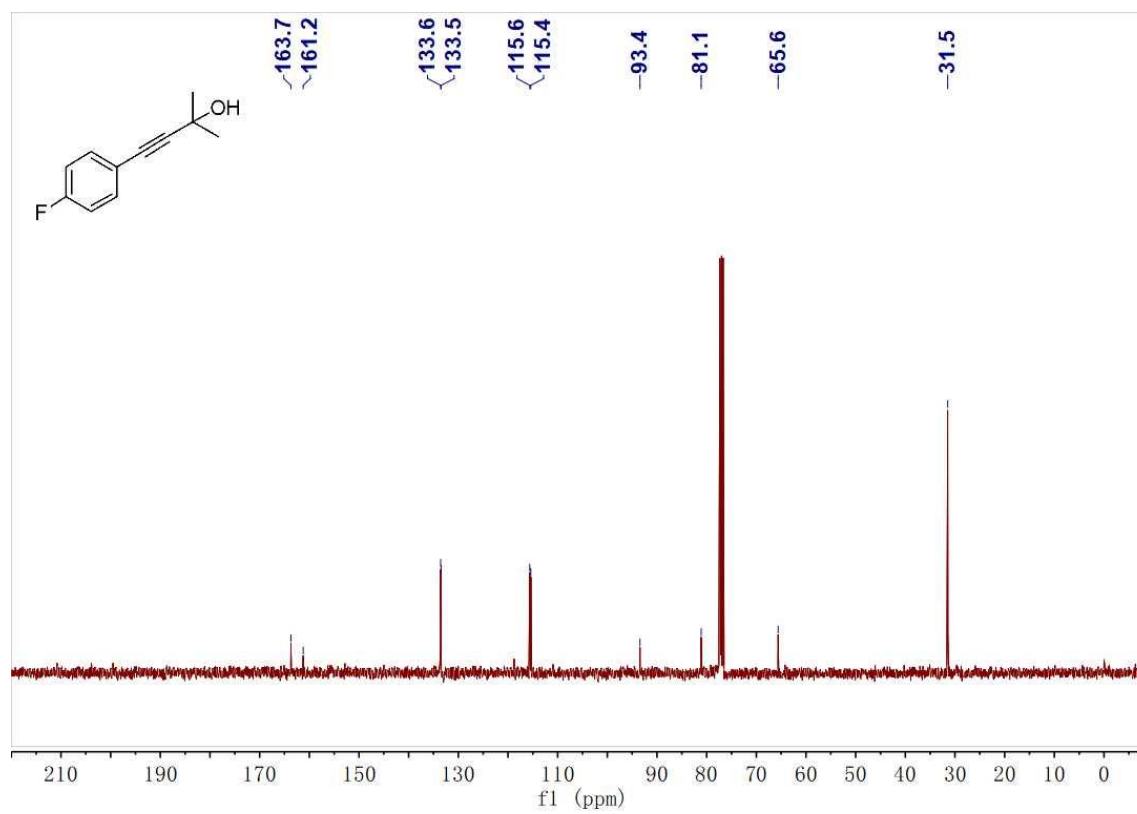

1i

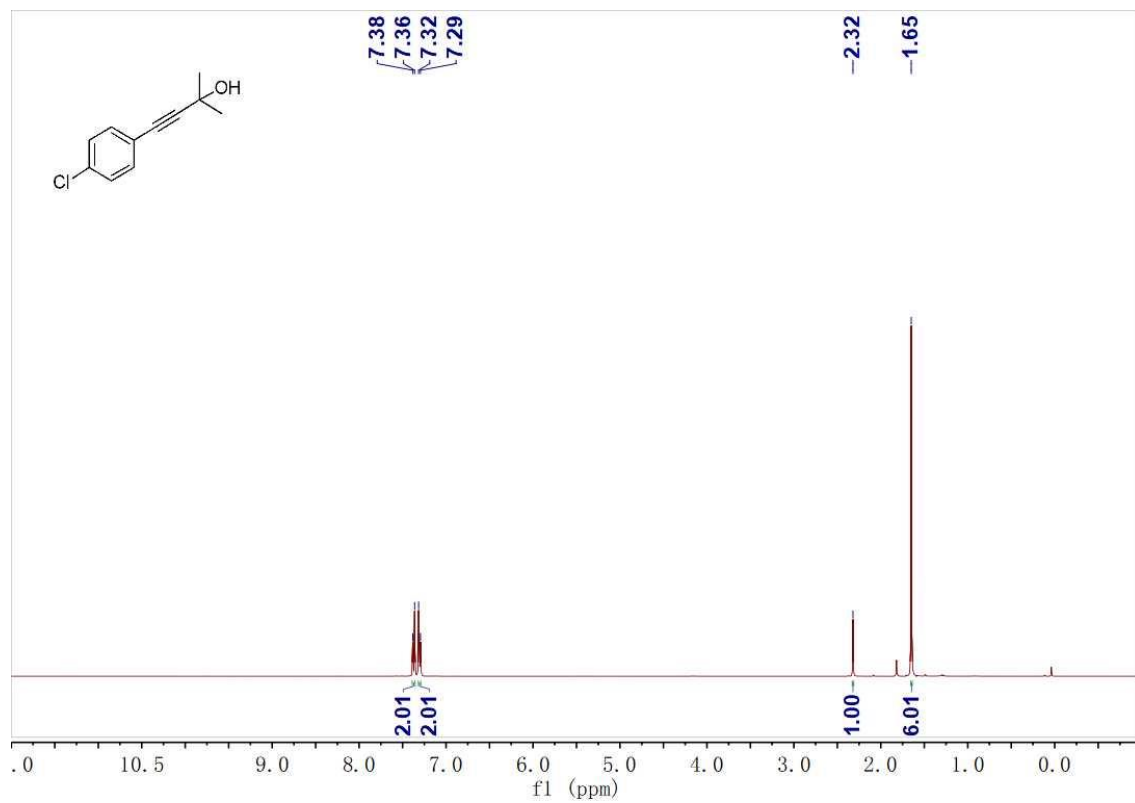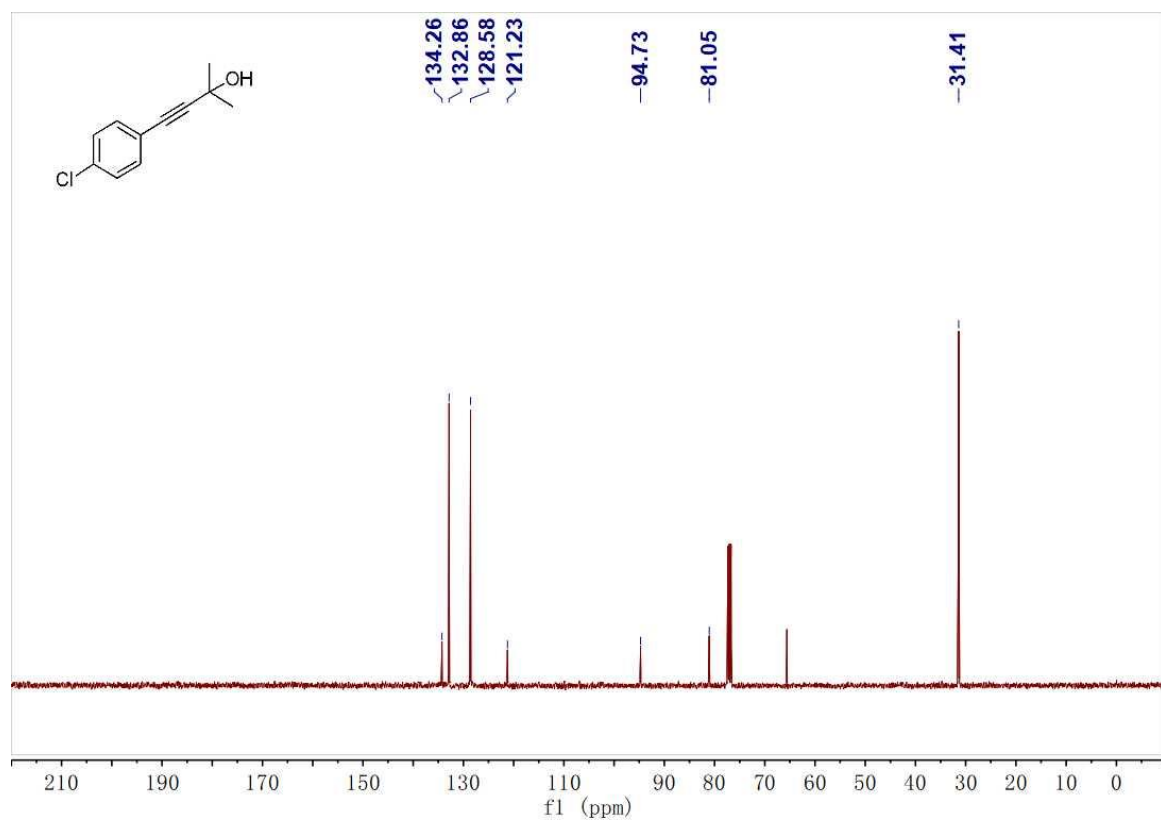

S30

1j

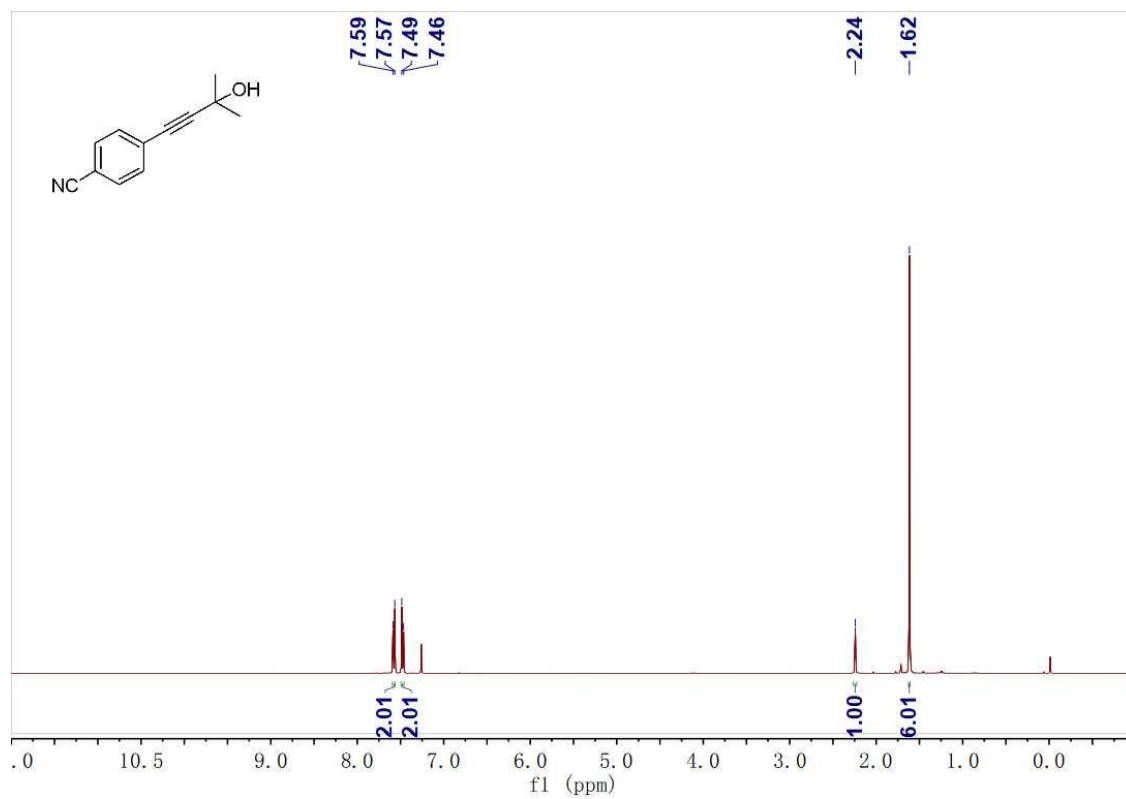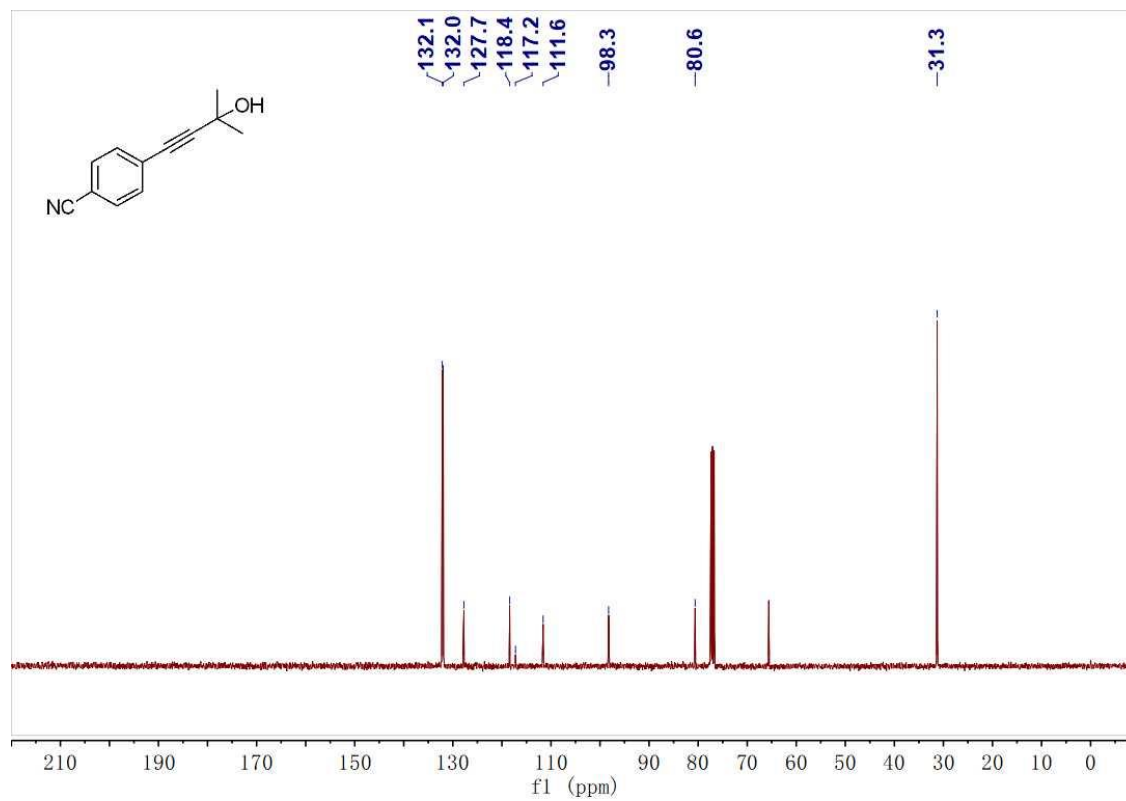

S31

# 1k

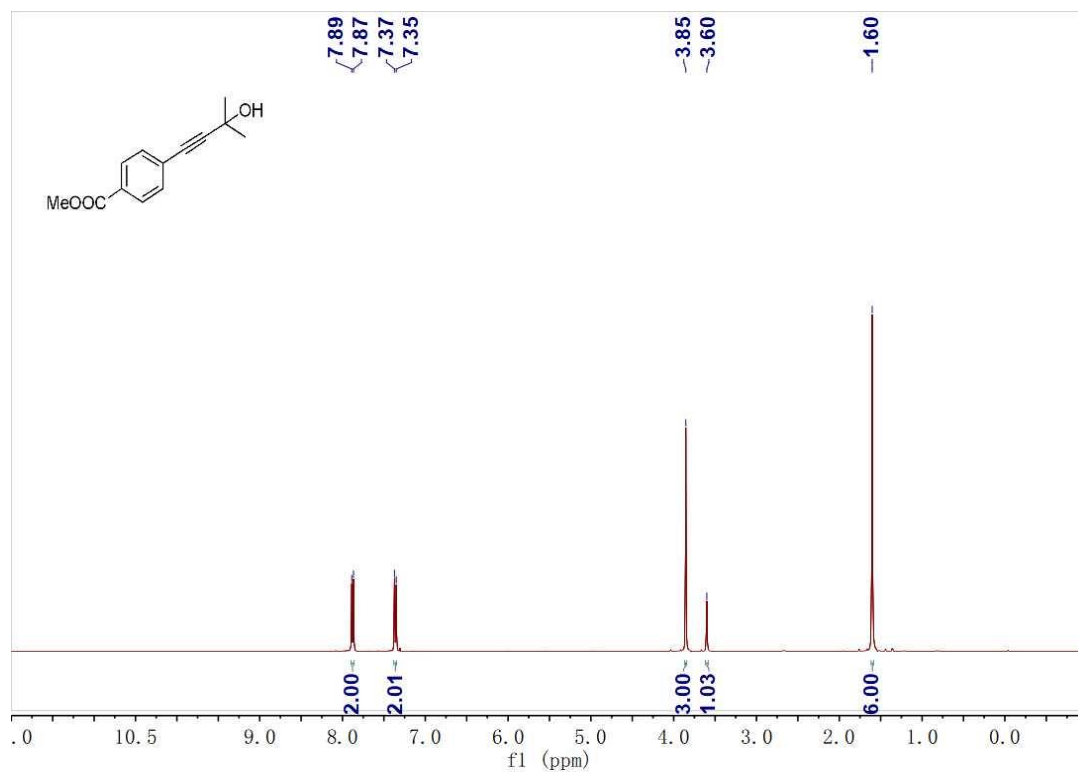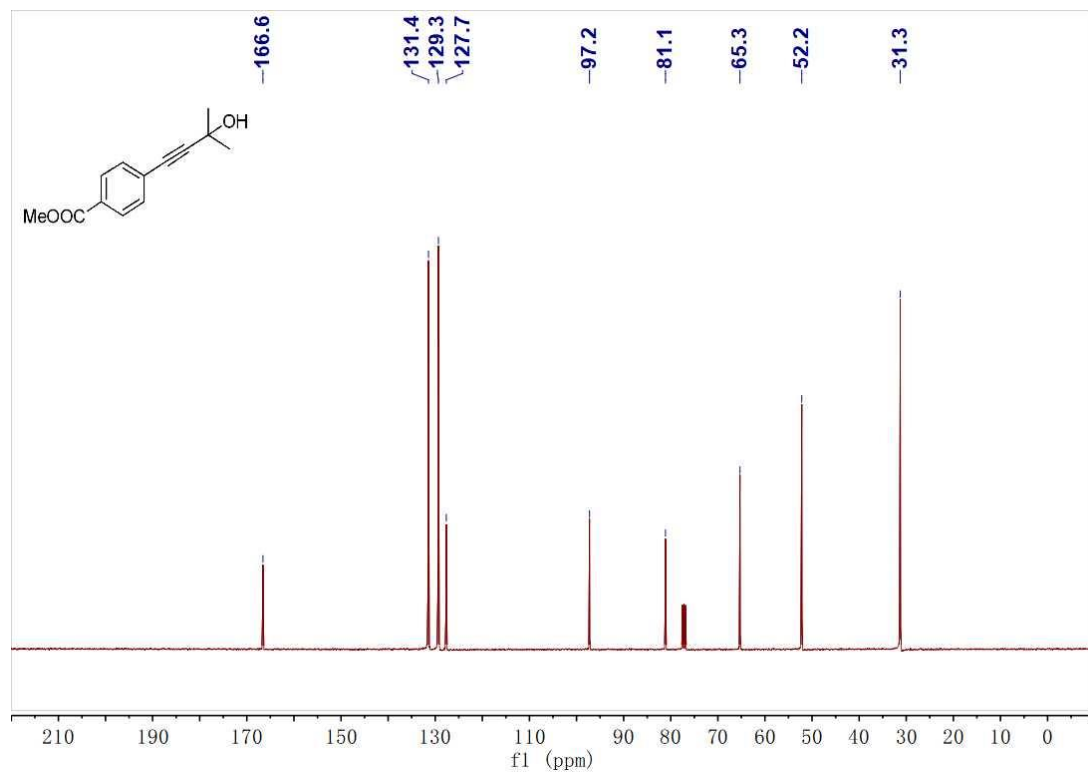



11

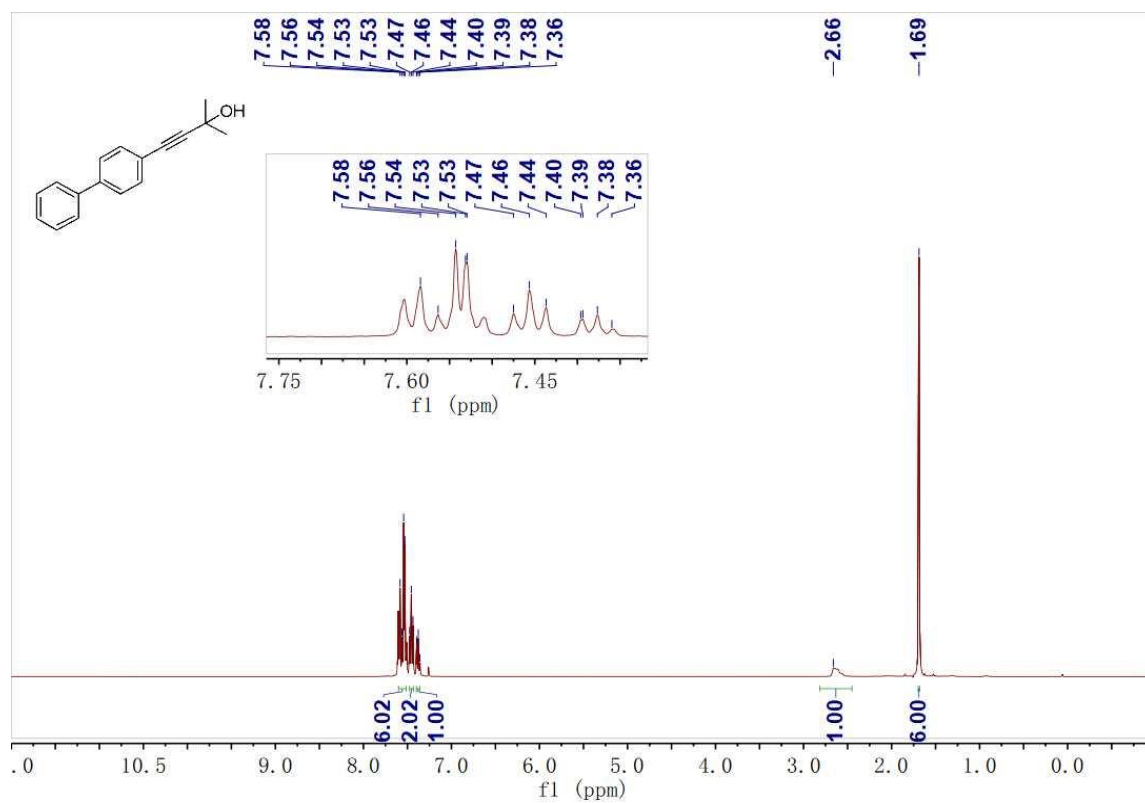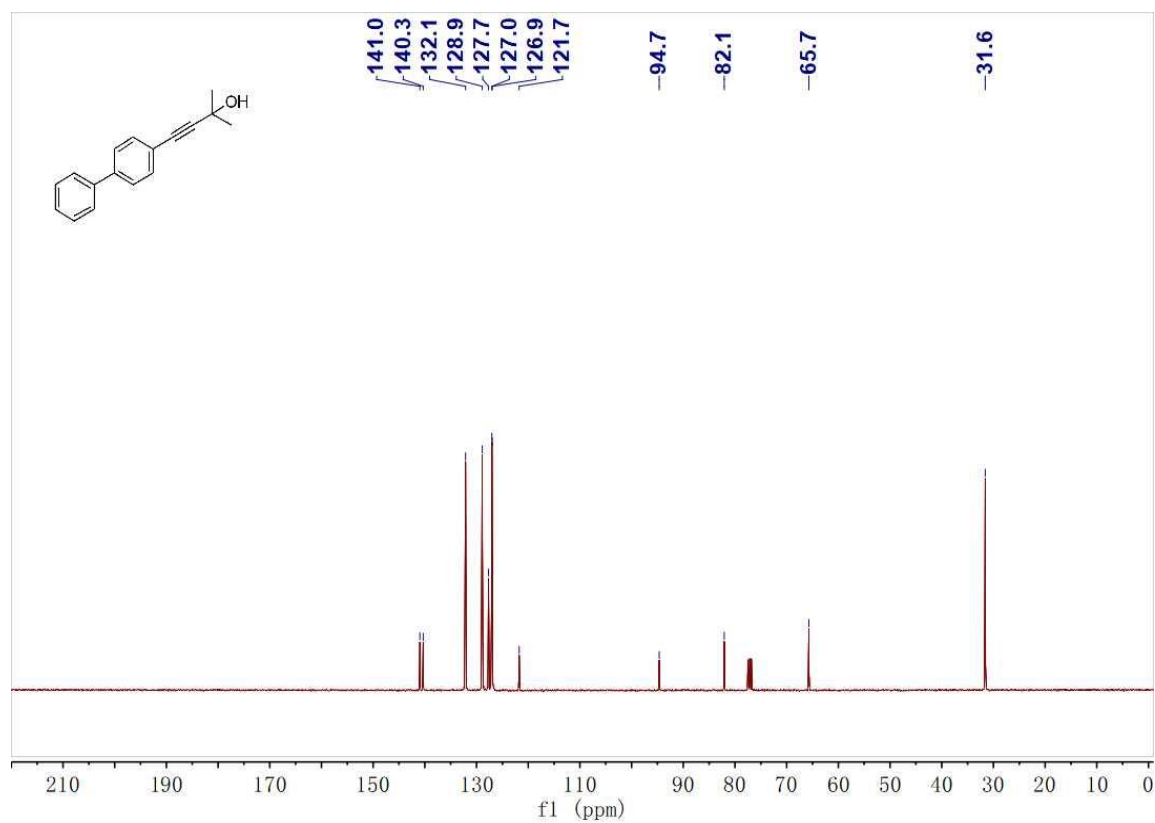

S33

# 1m

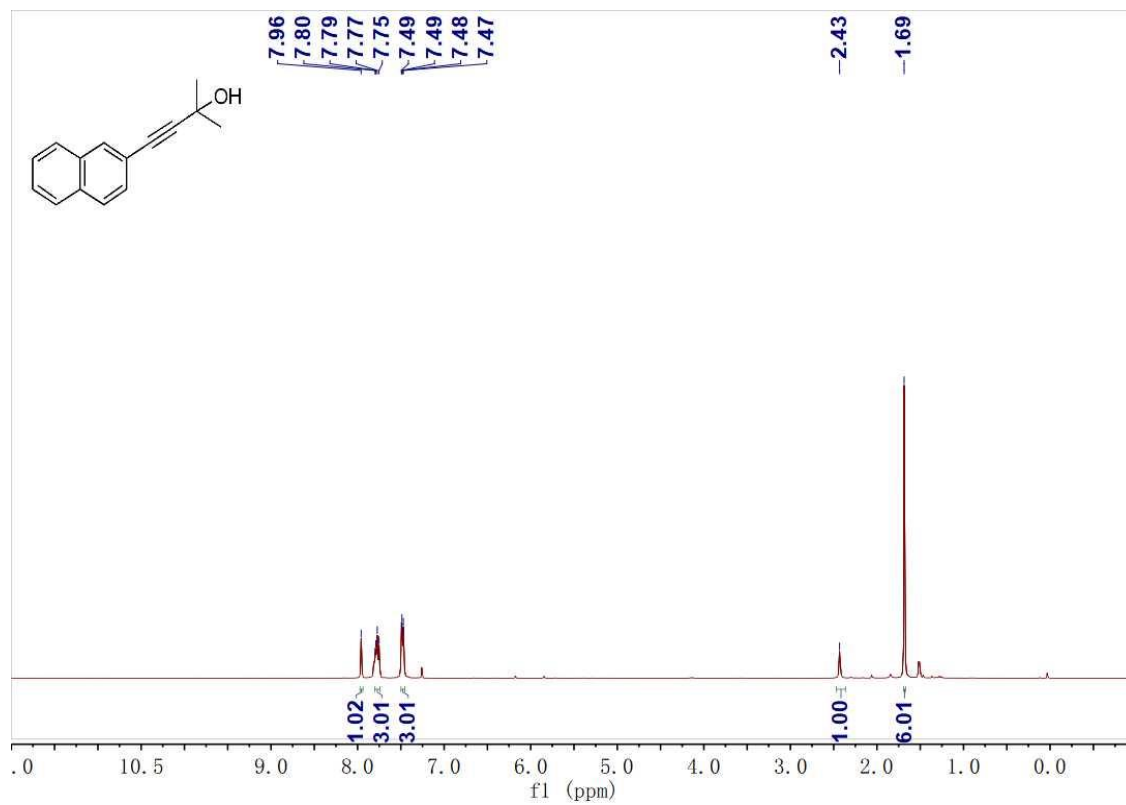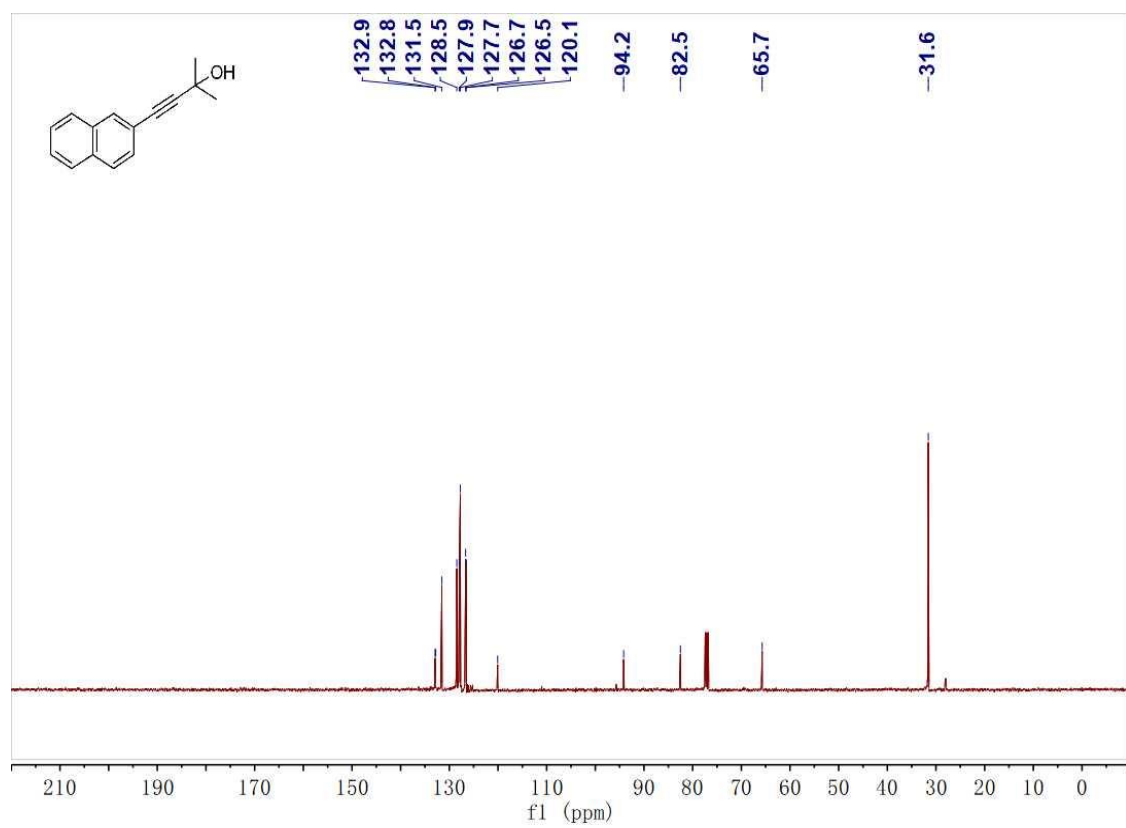

# 1n

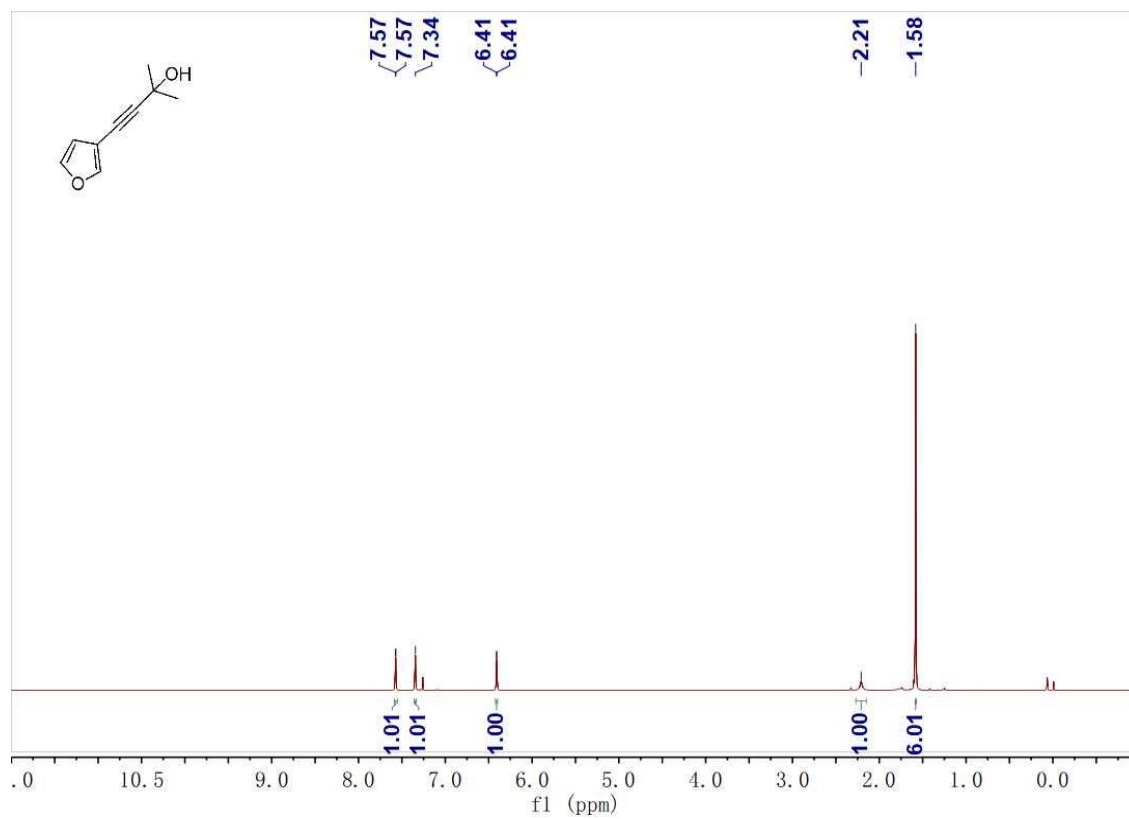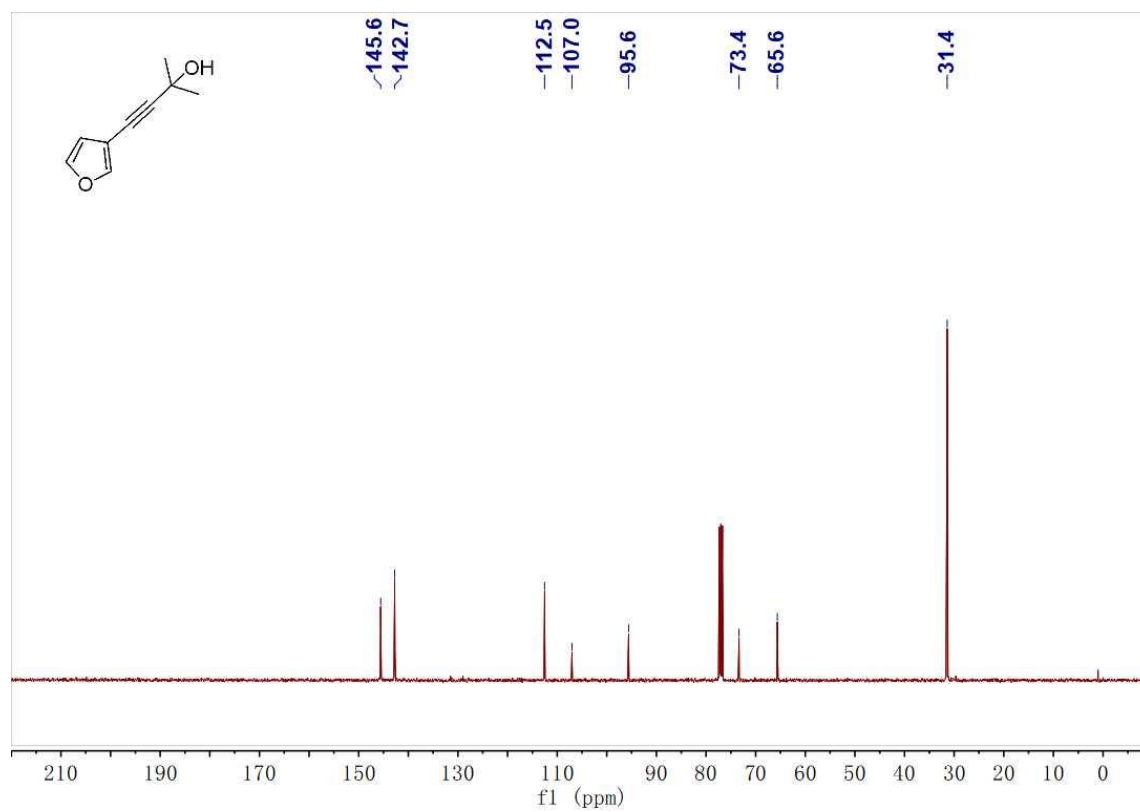

1o

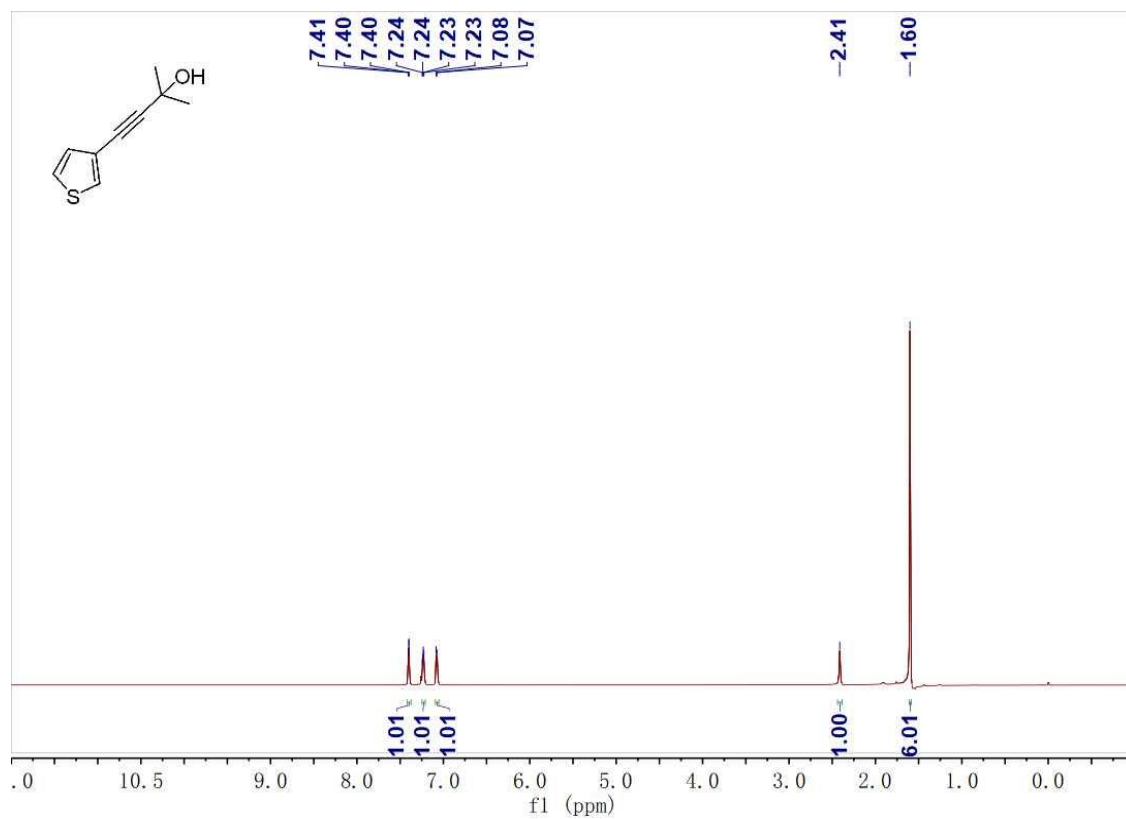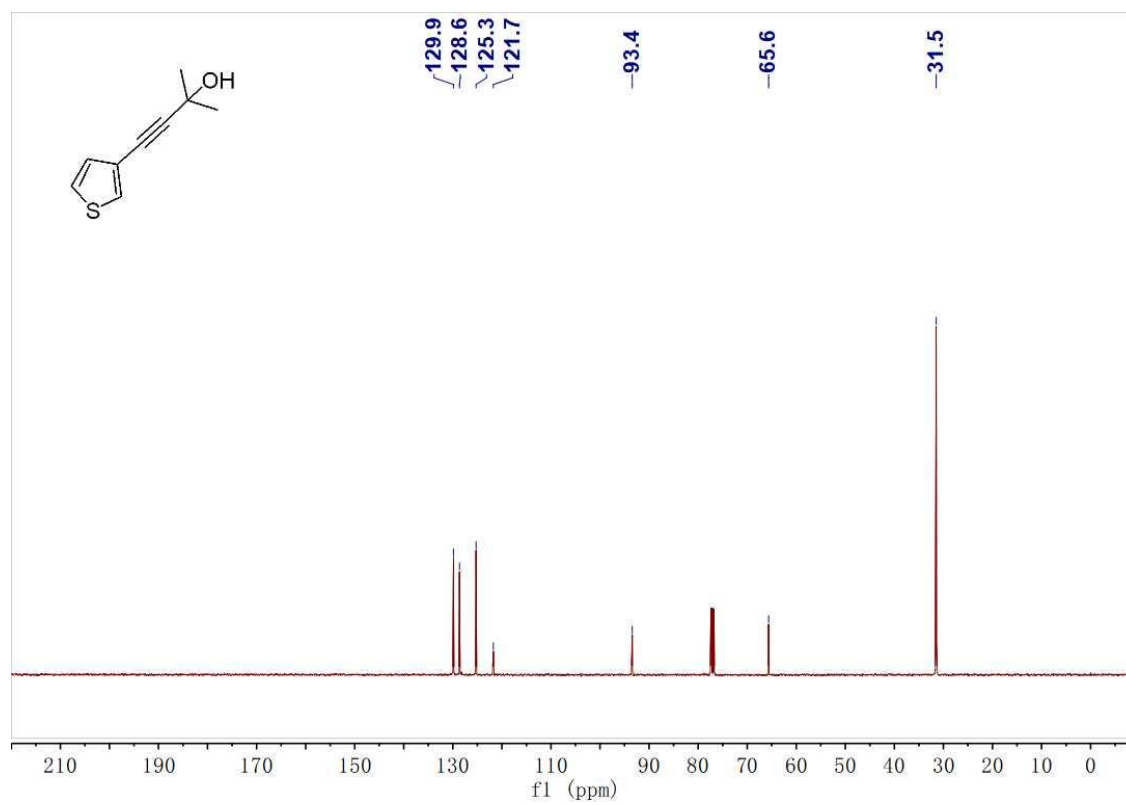

1p

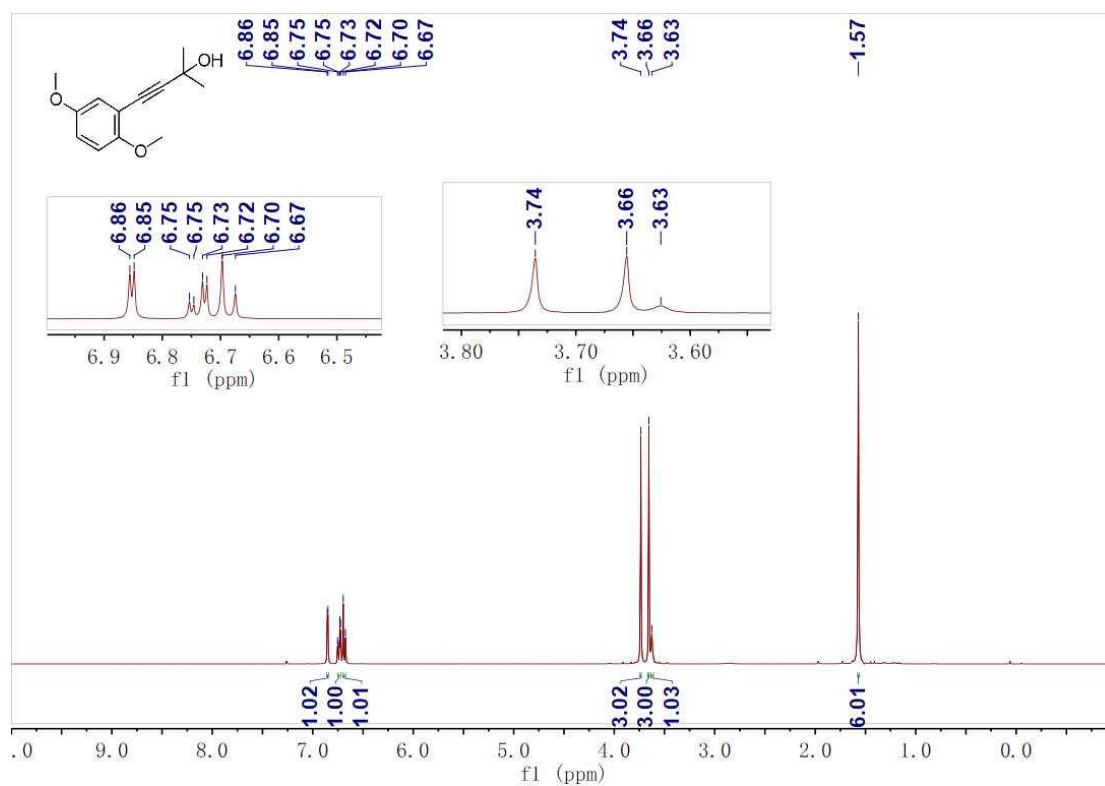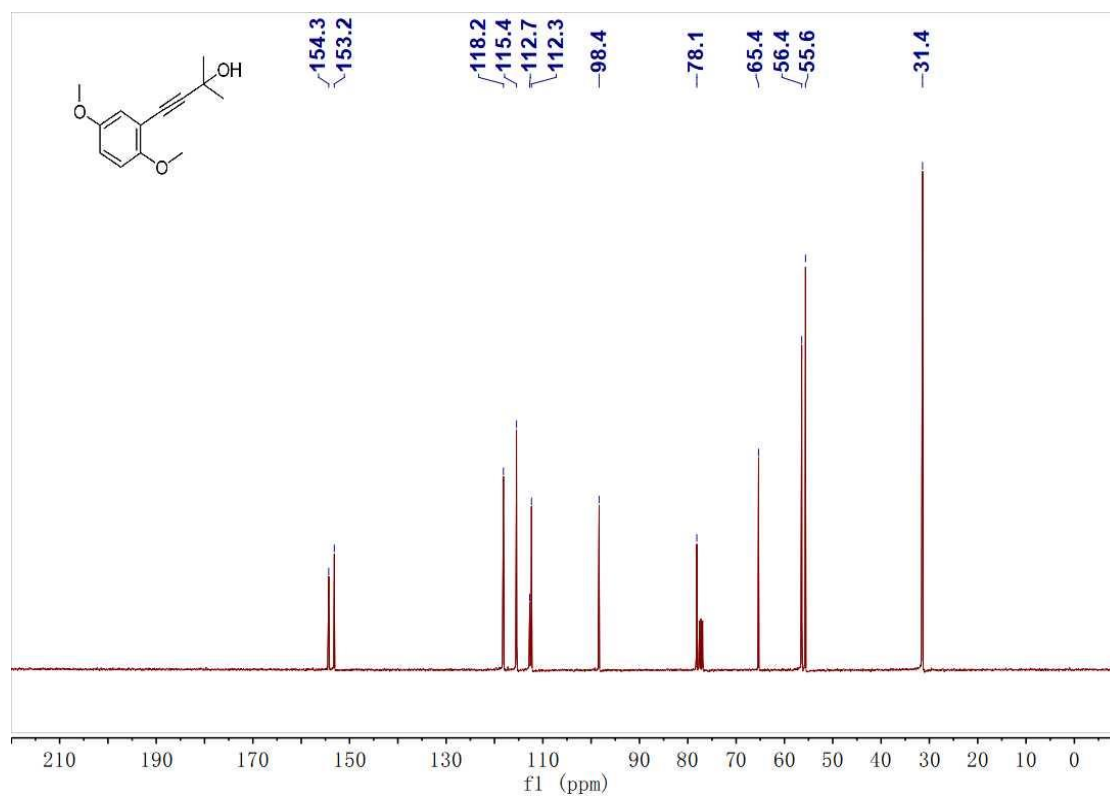

S37

# 1q

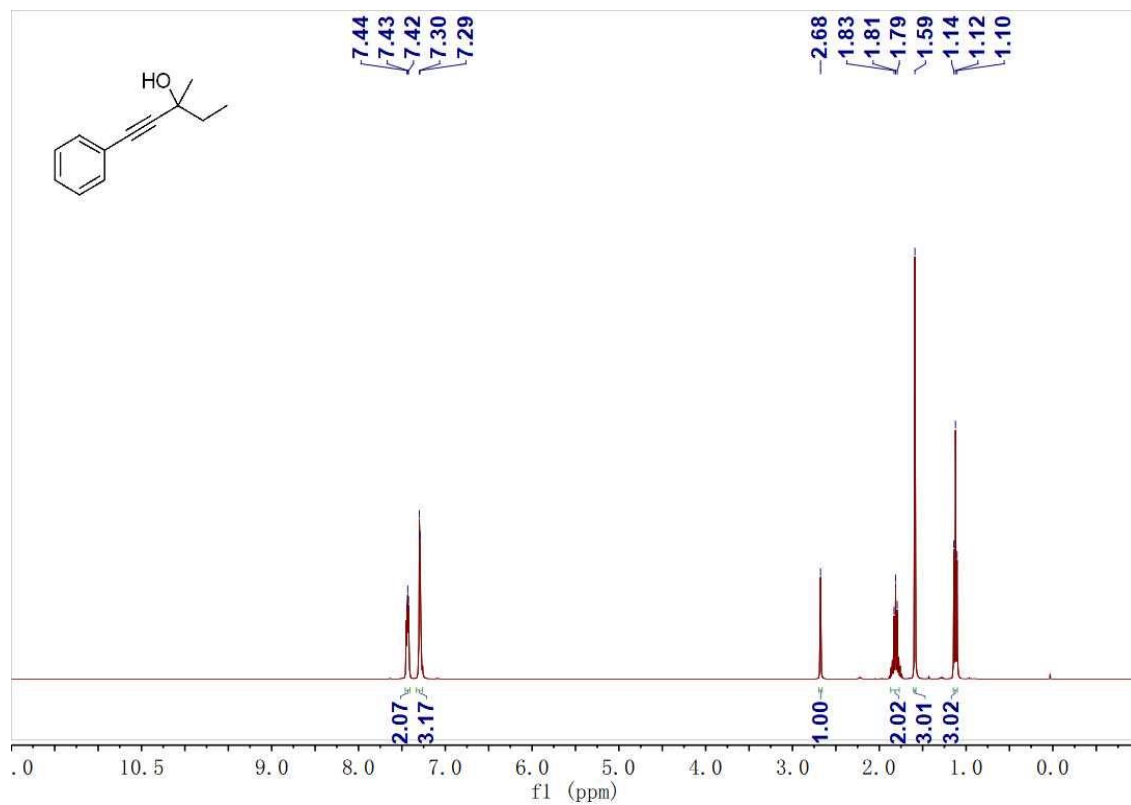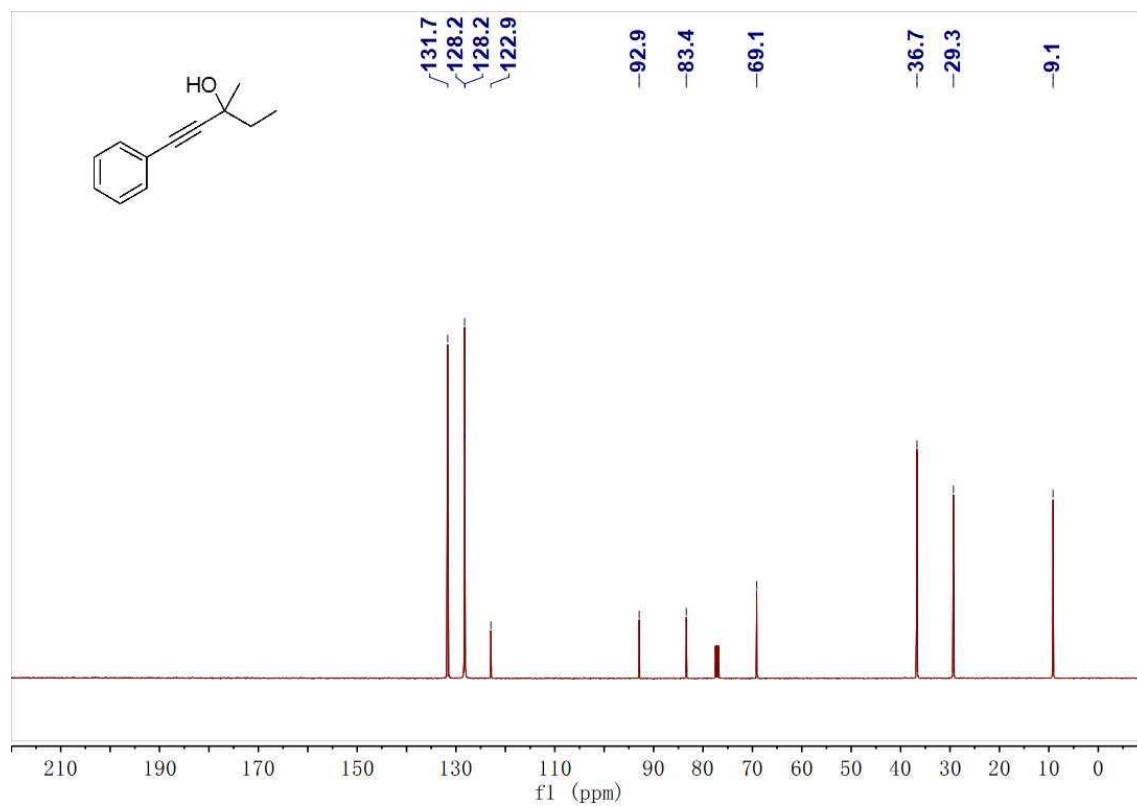

# 1r

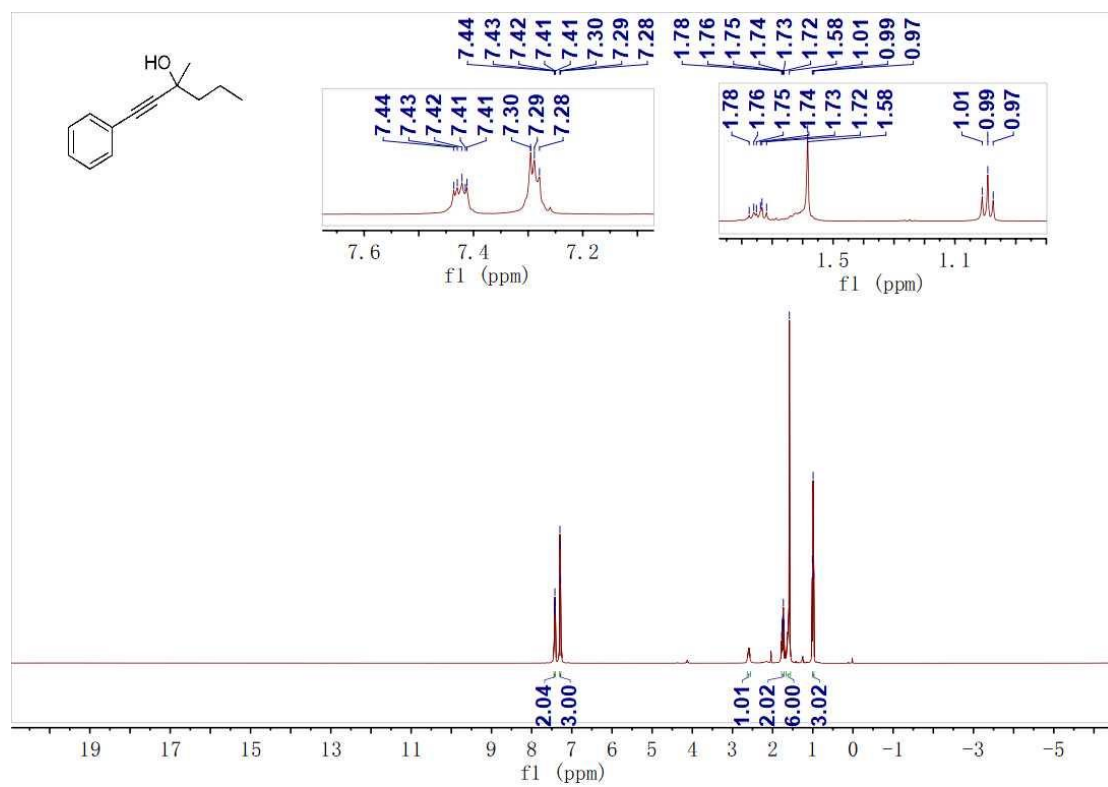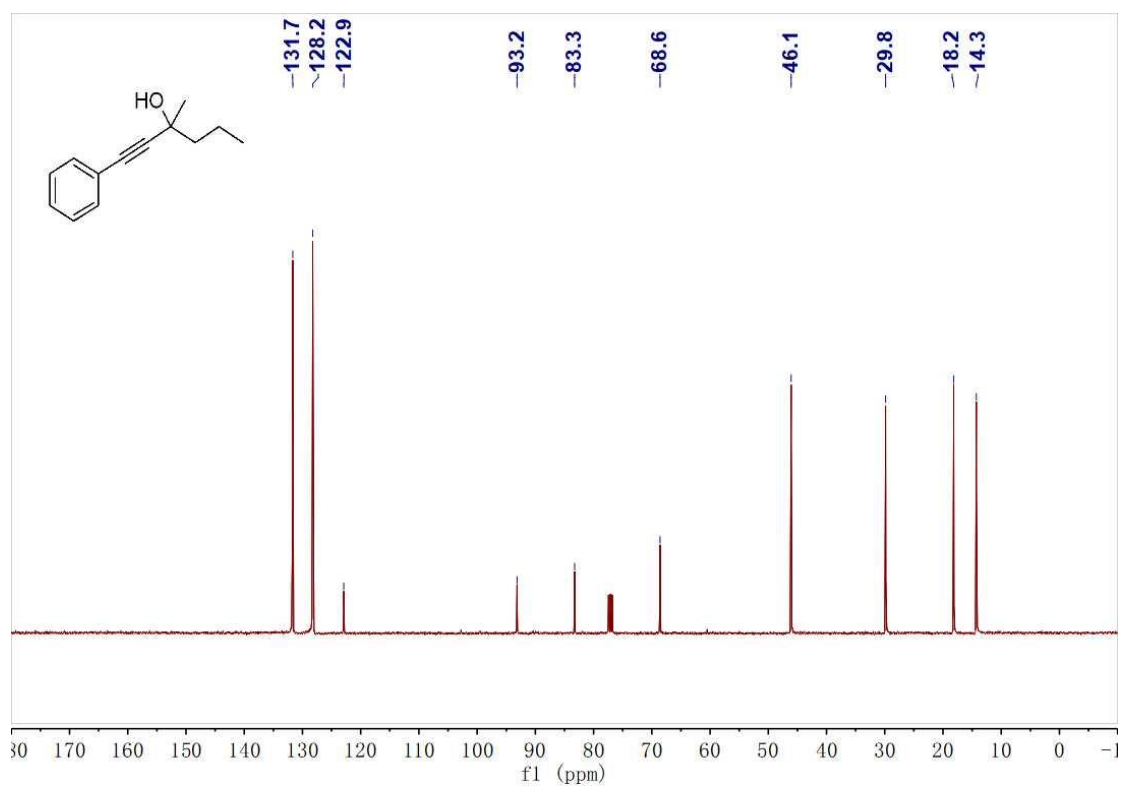

# 1s

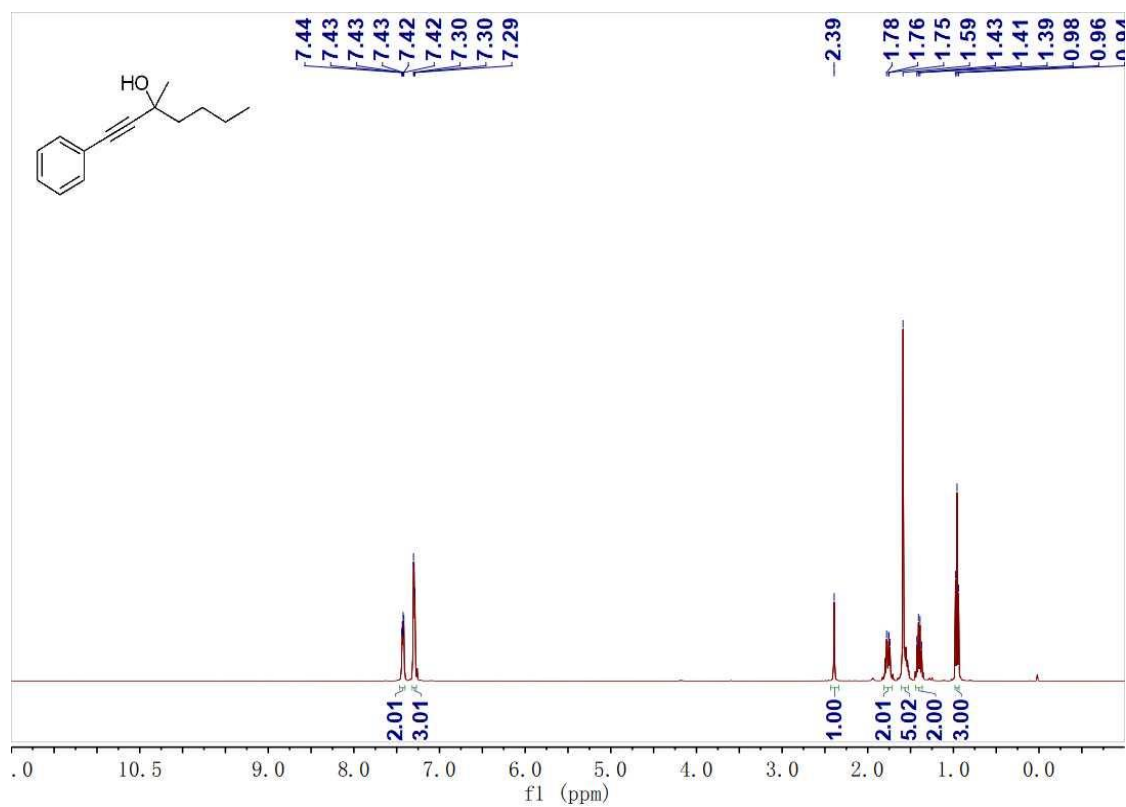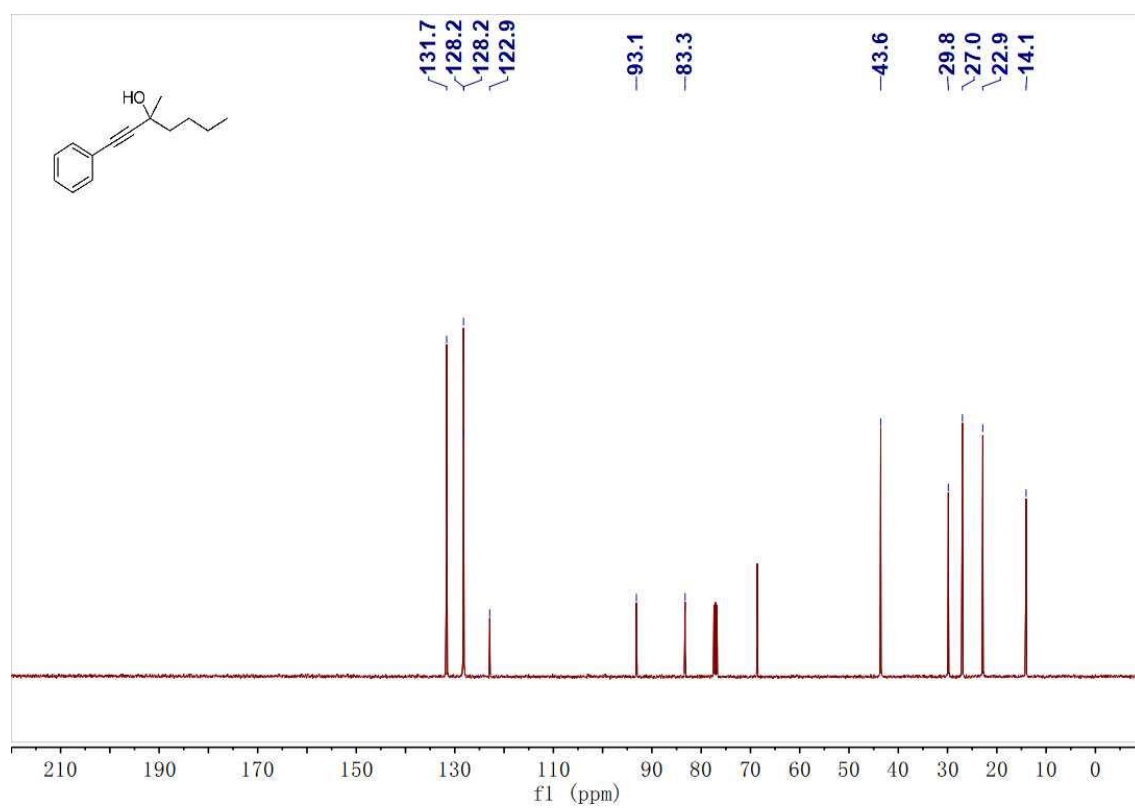



1t

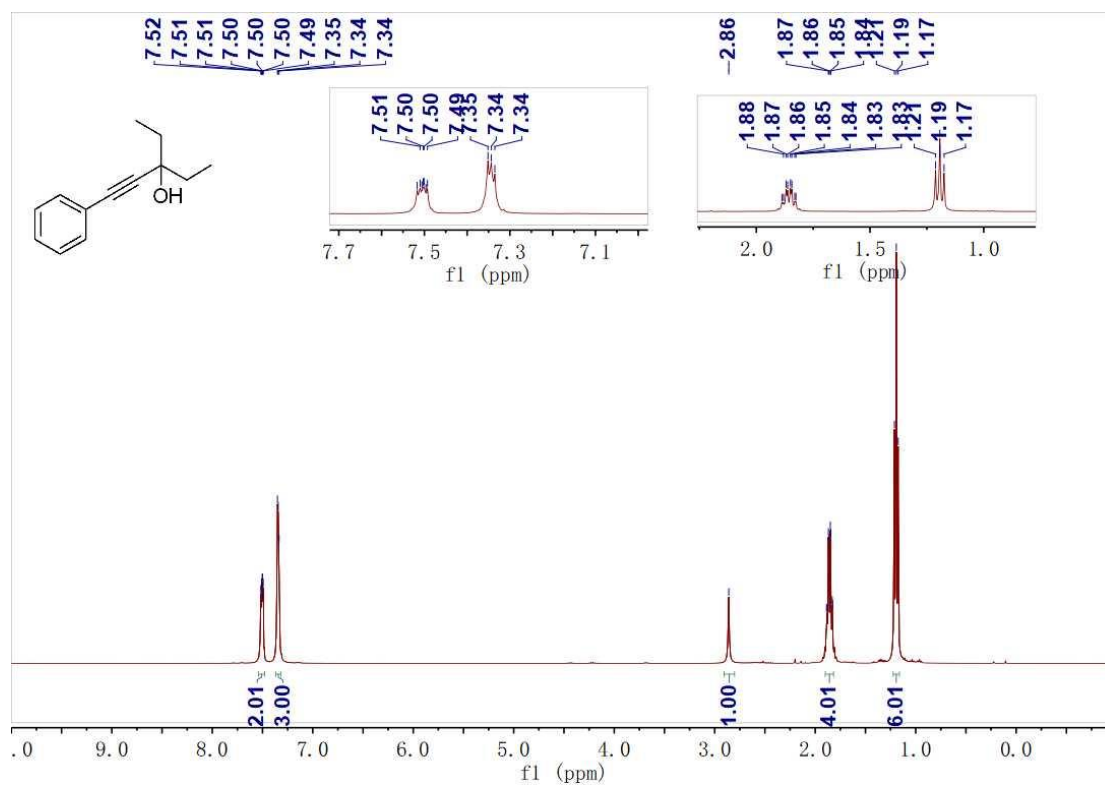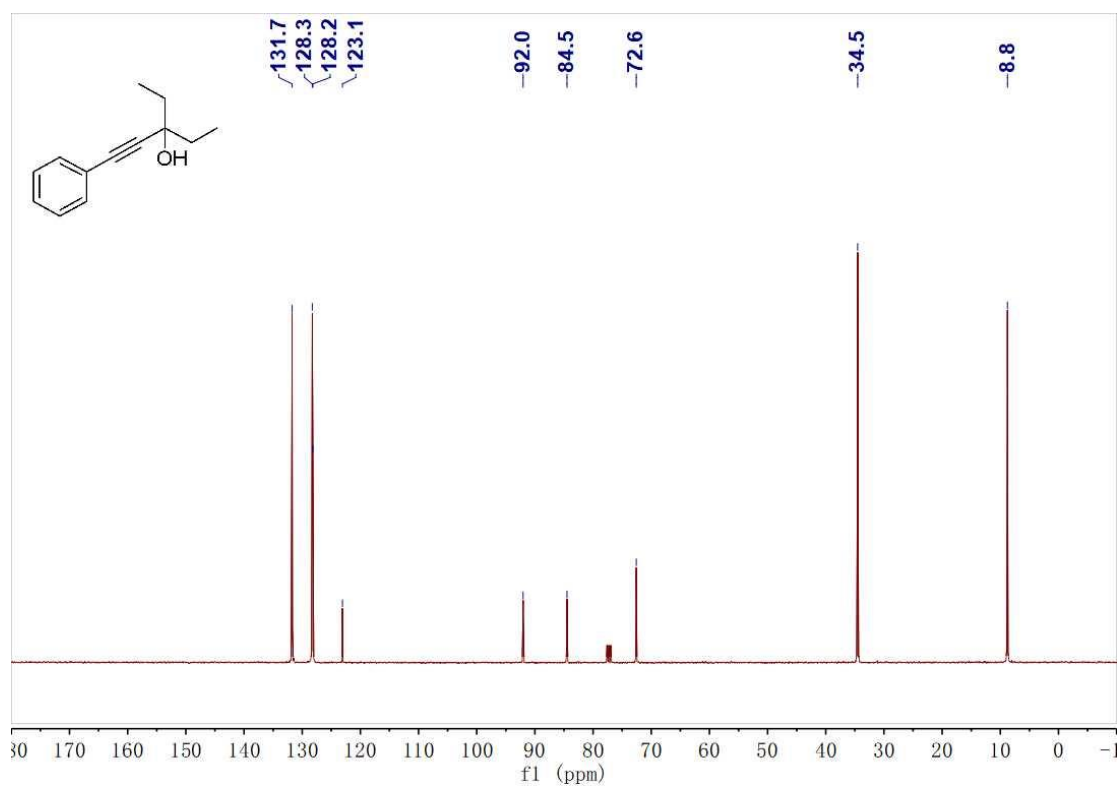

S41

1u

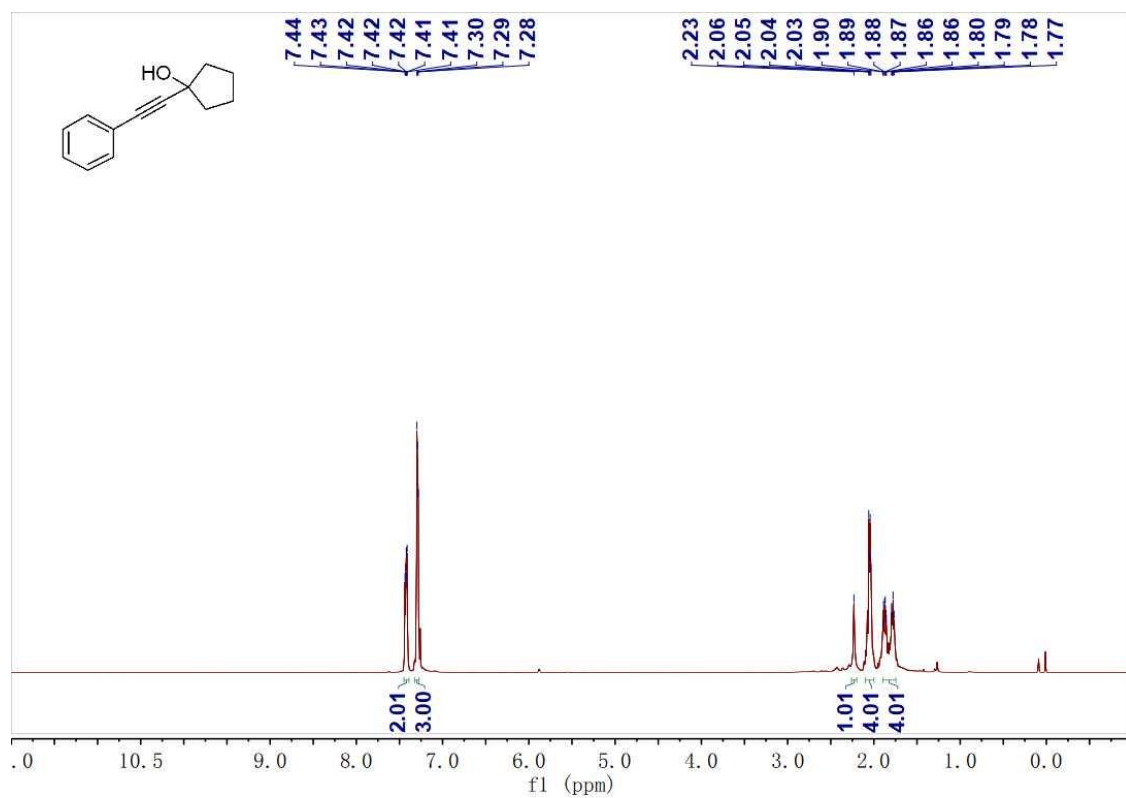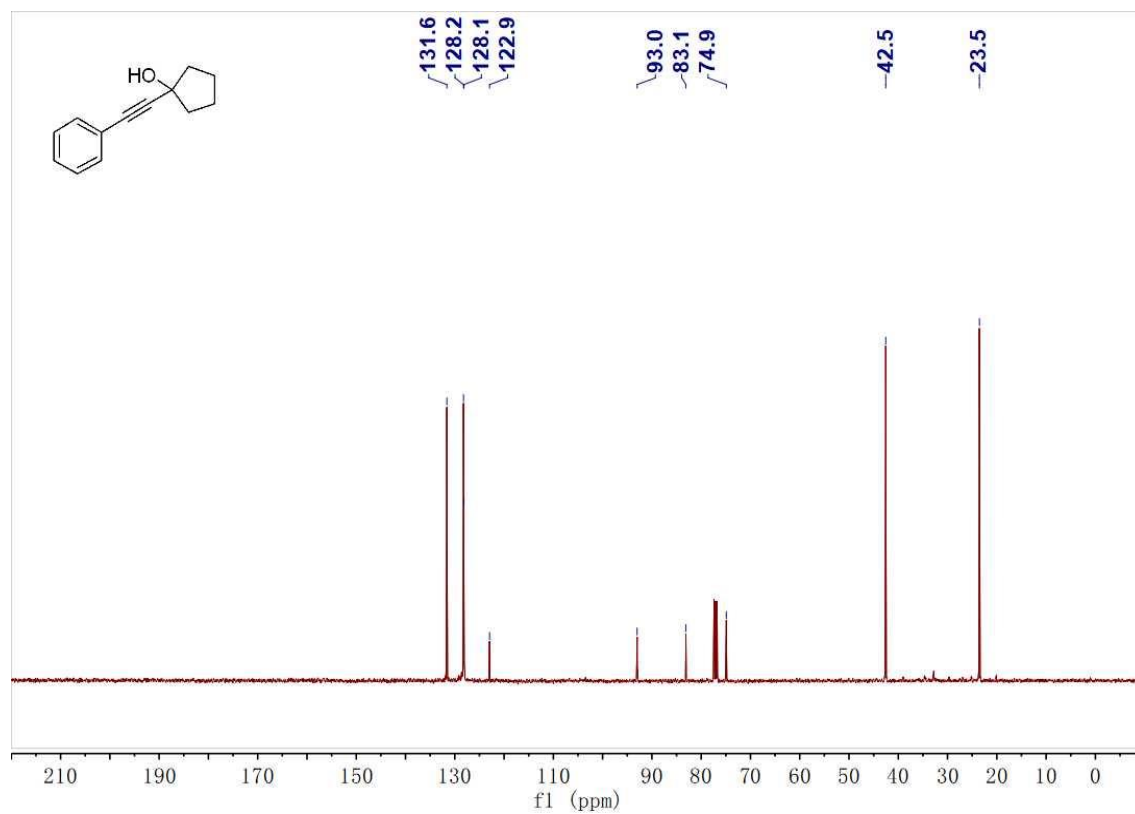

# 1v

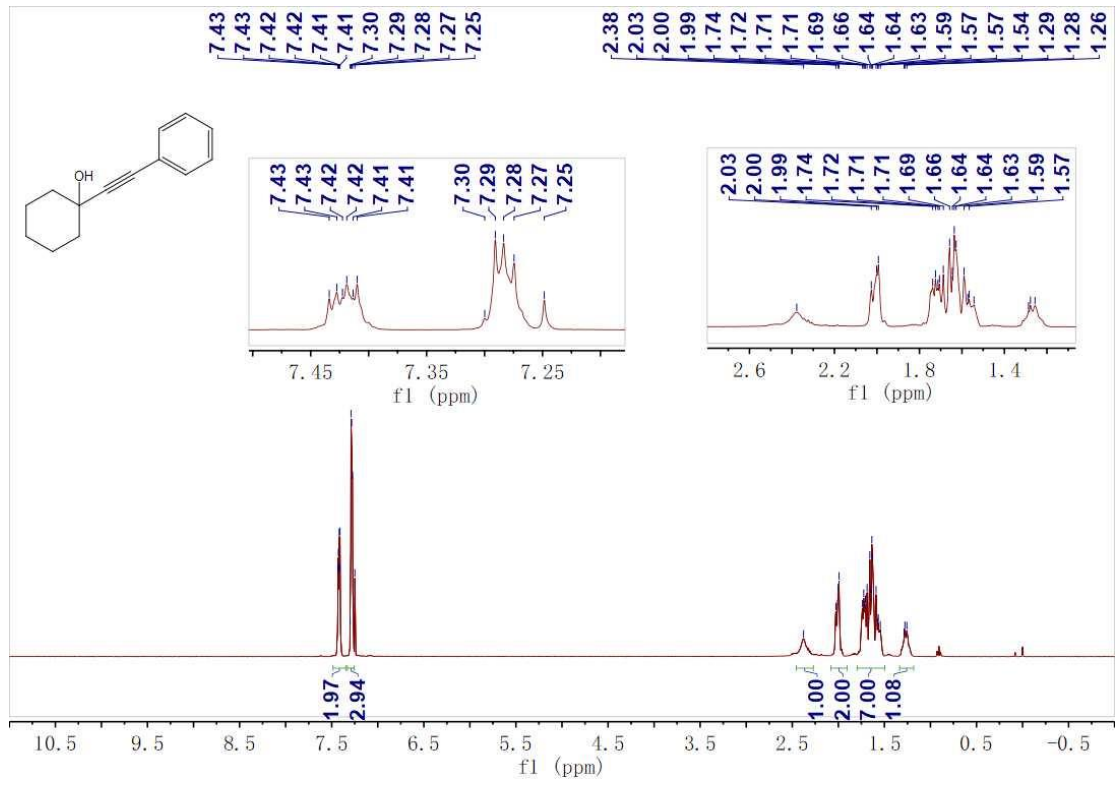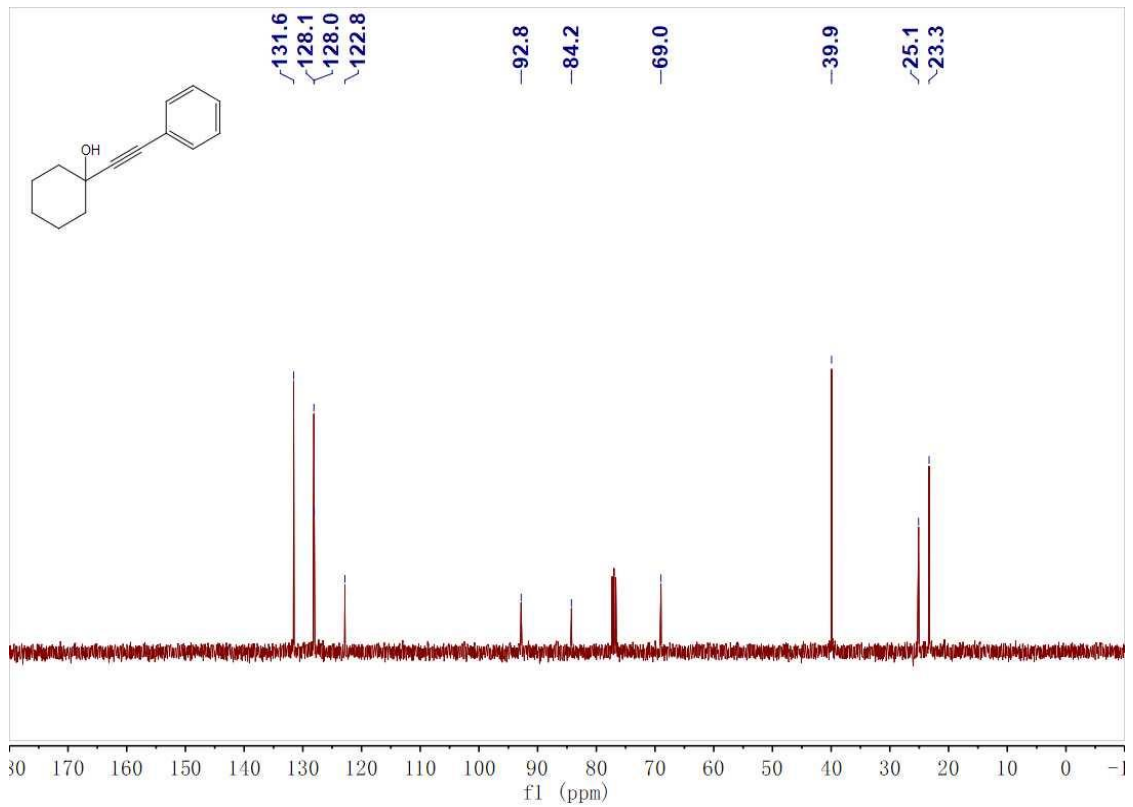

1w

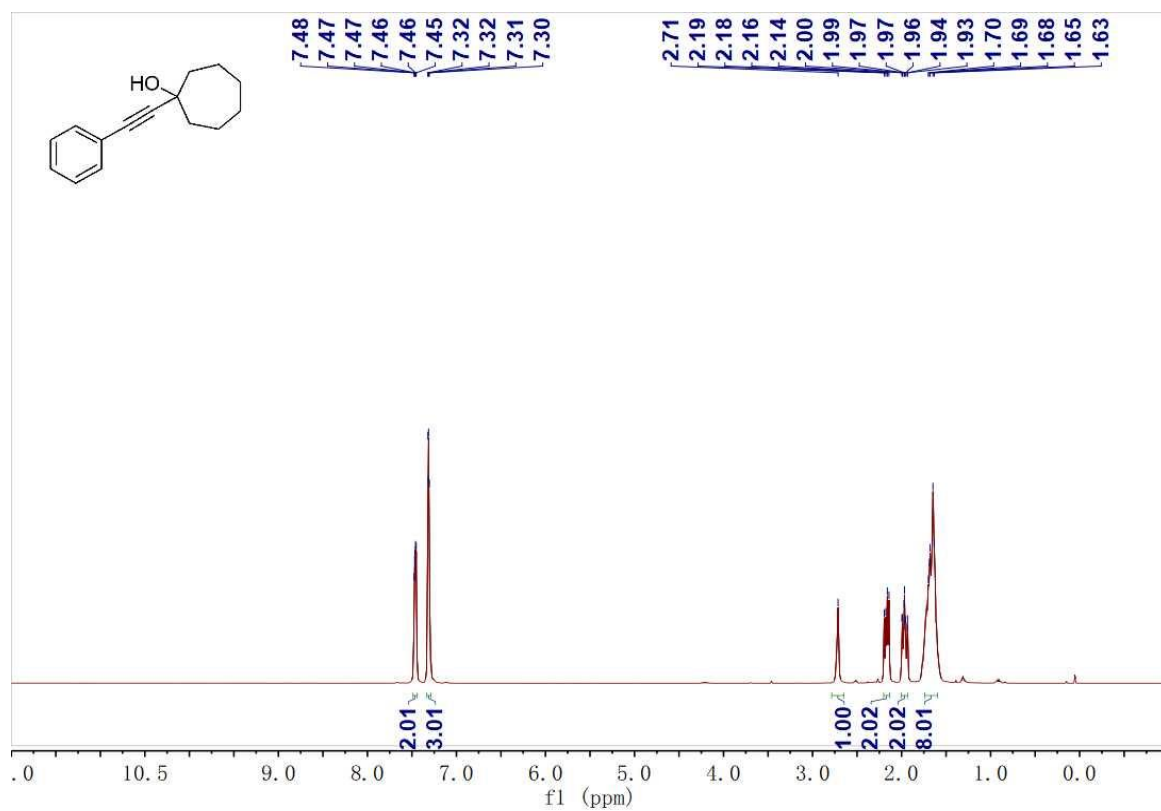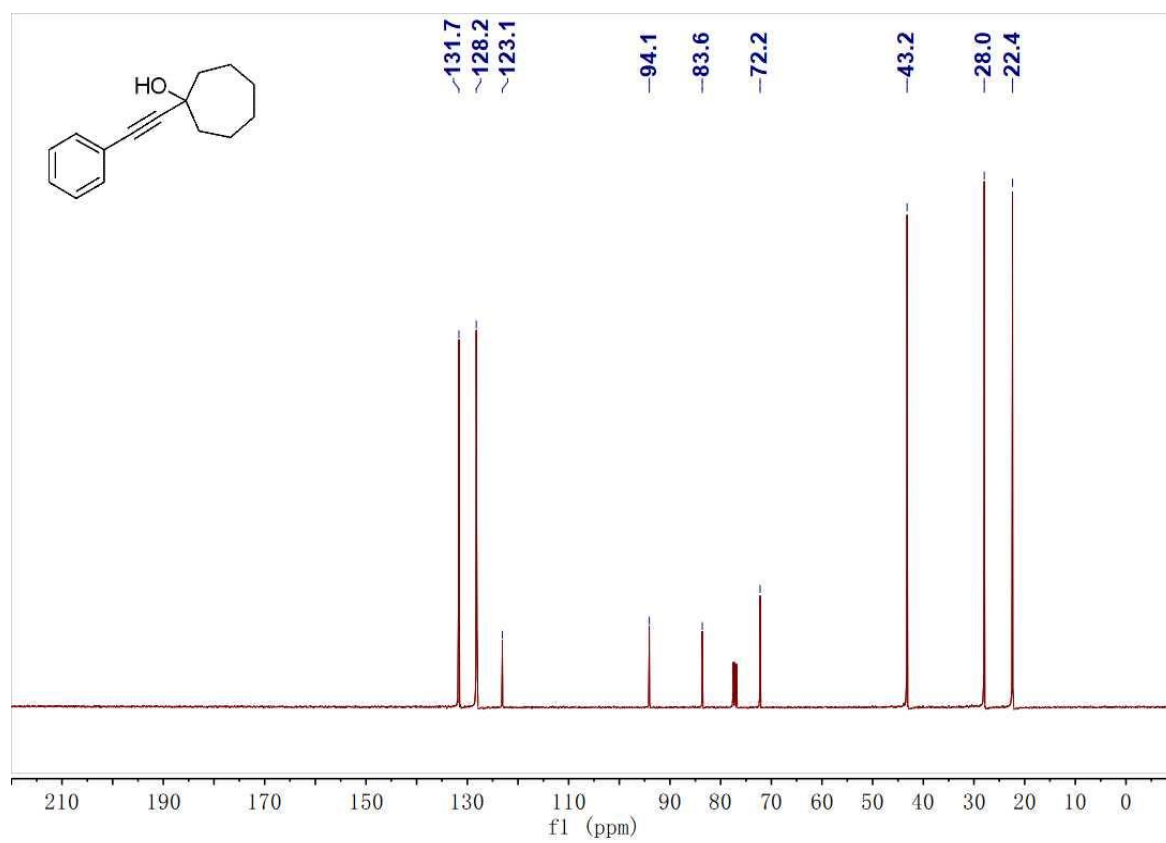

S44

**1x**

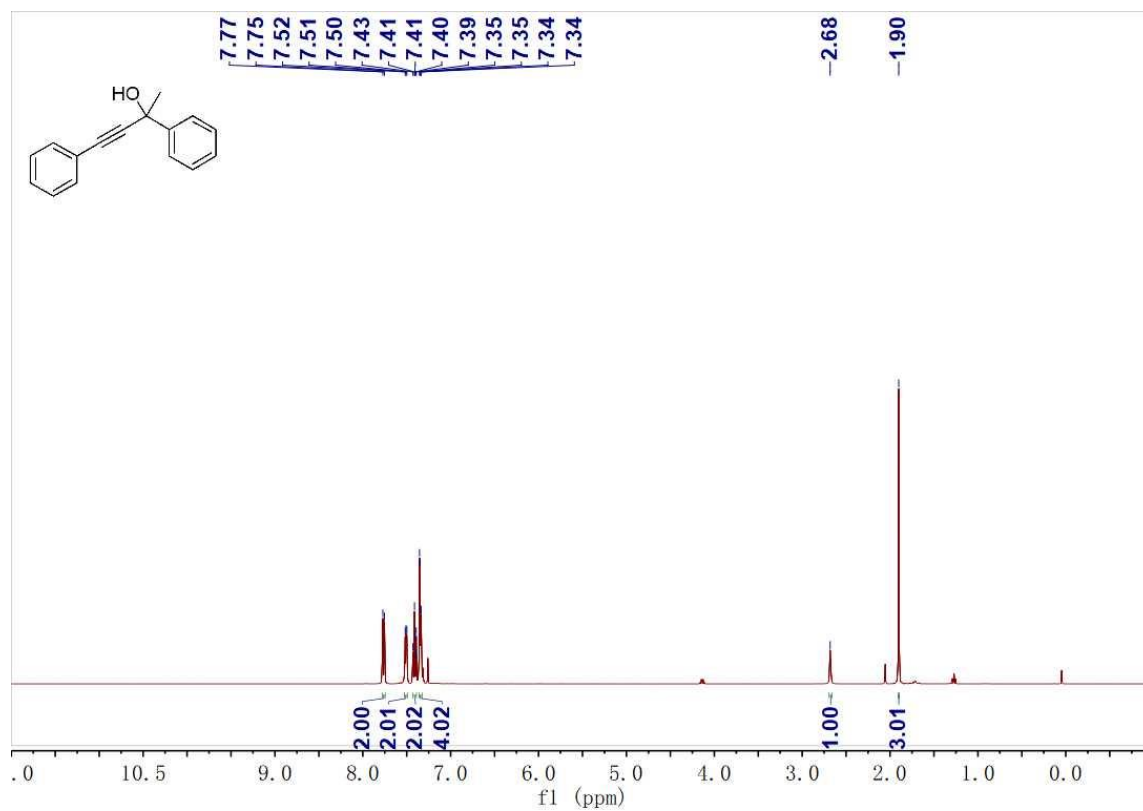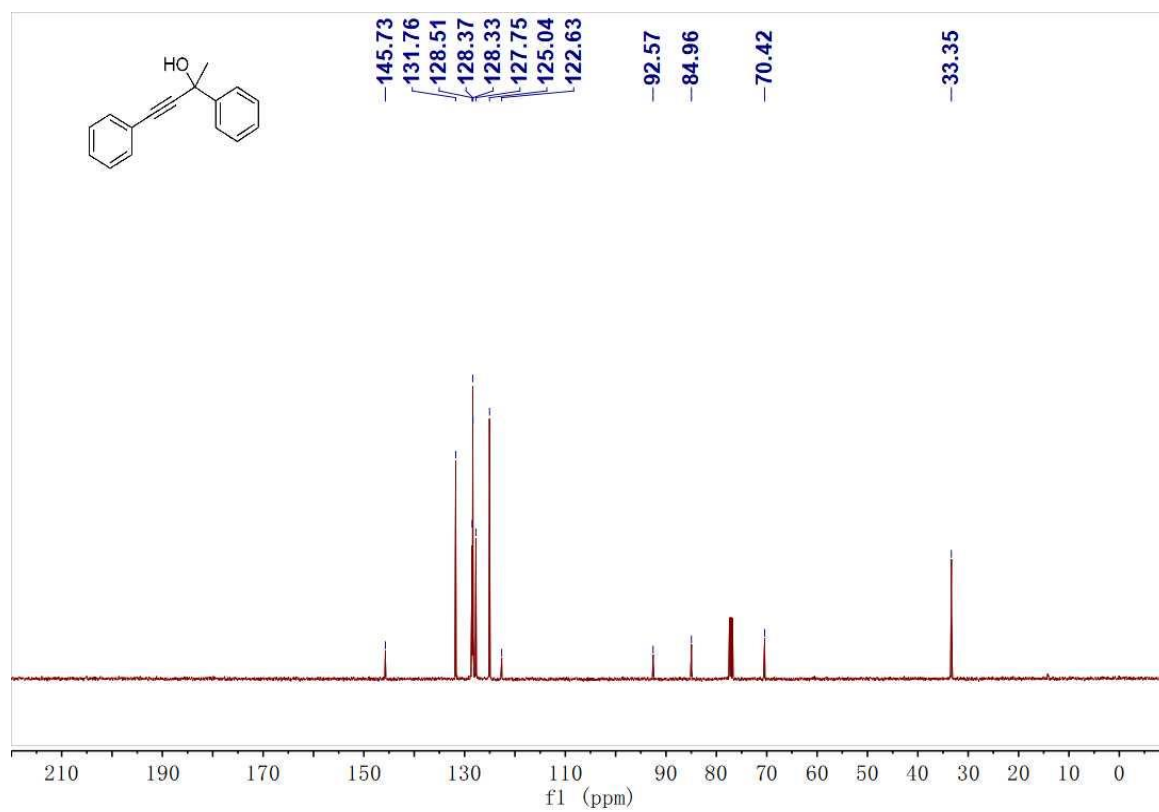

**S45**

## 9. Spectra of Products

2a

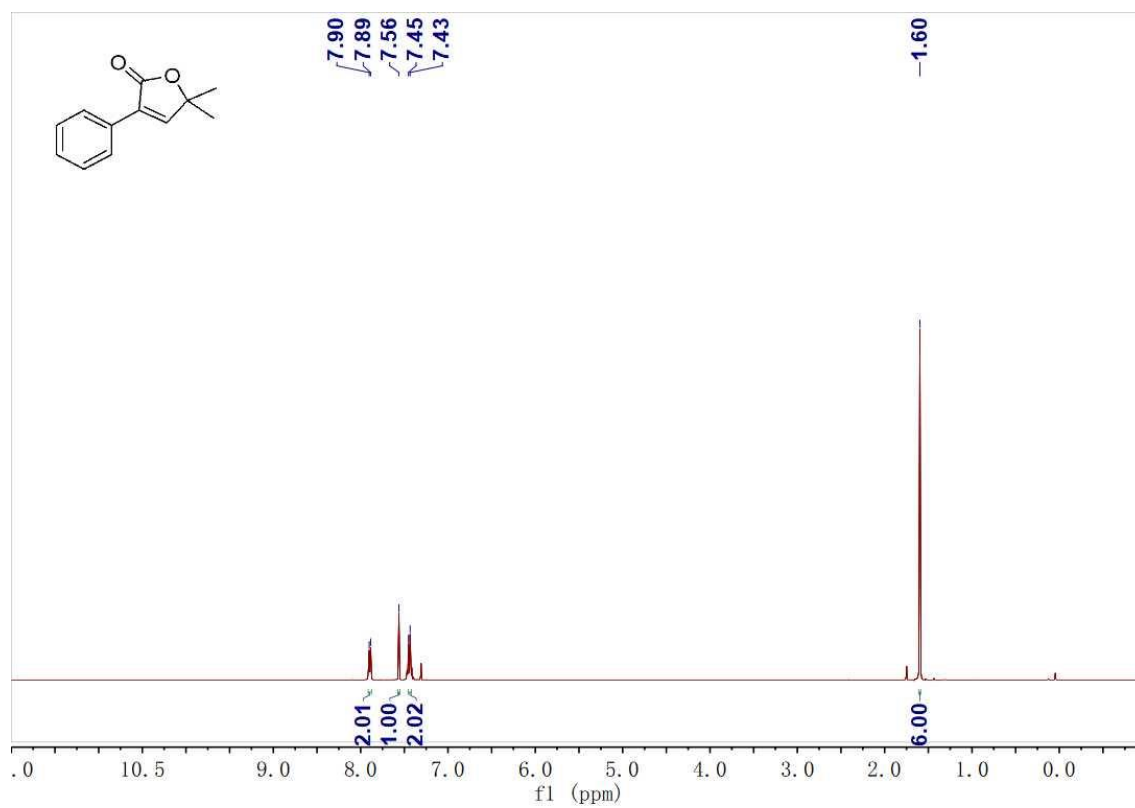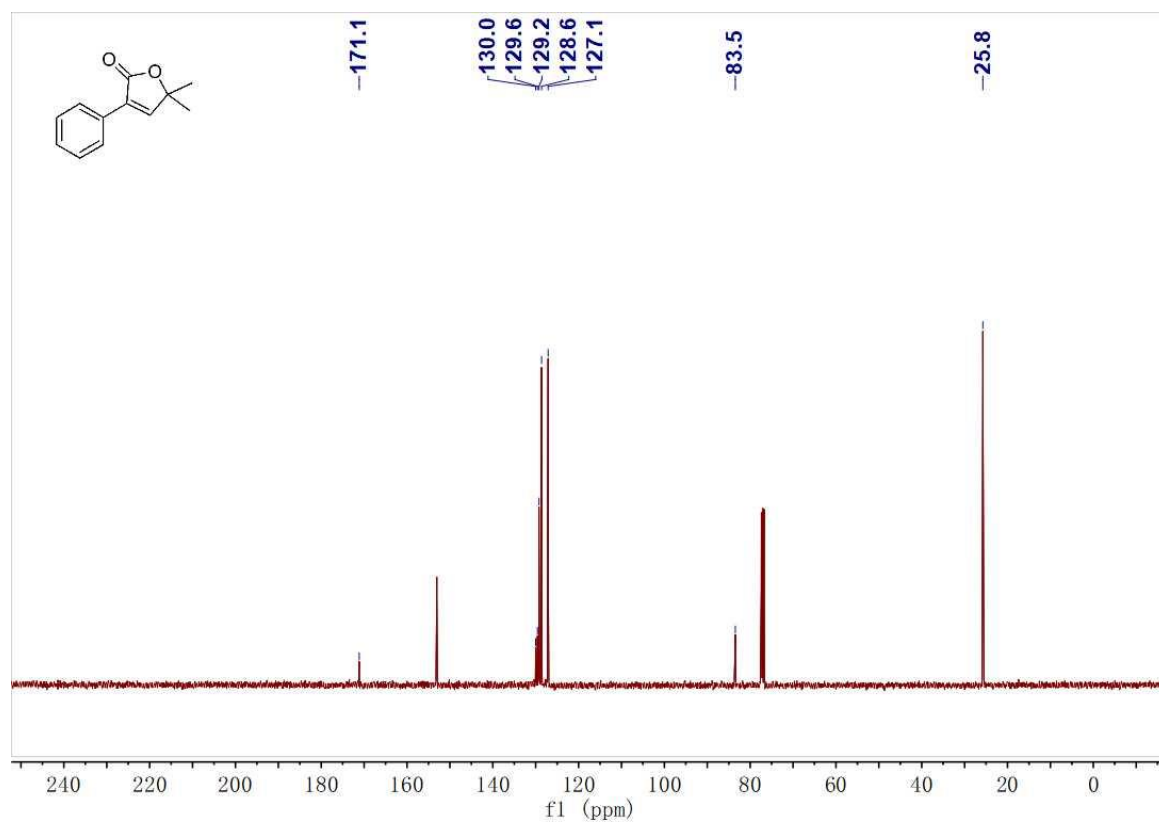

## 2b

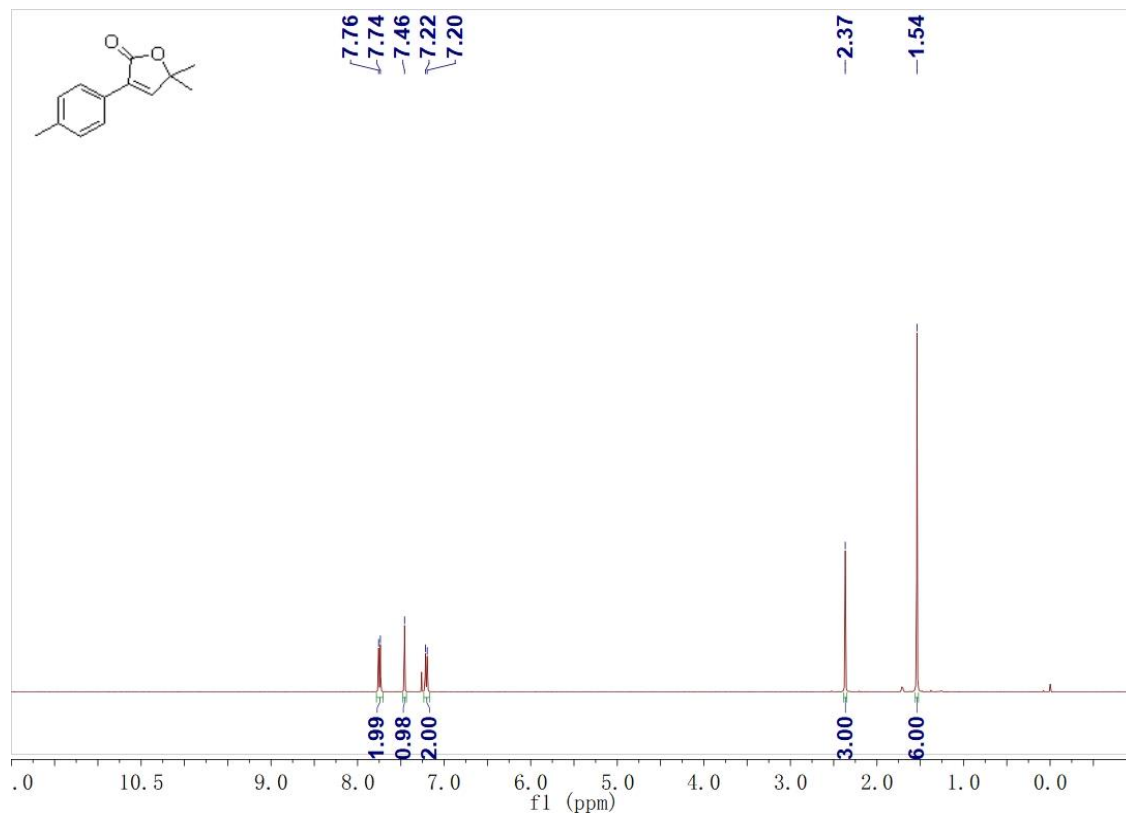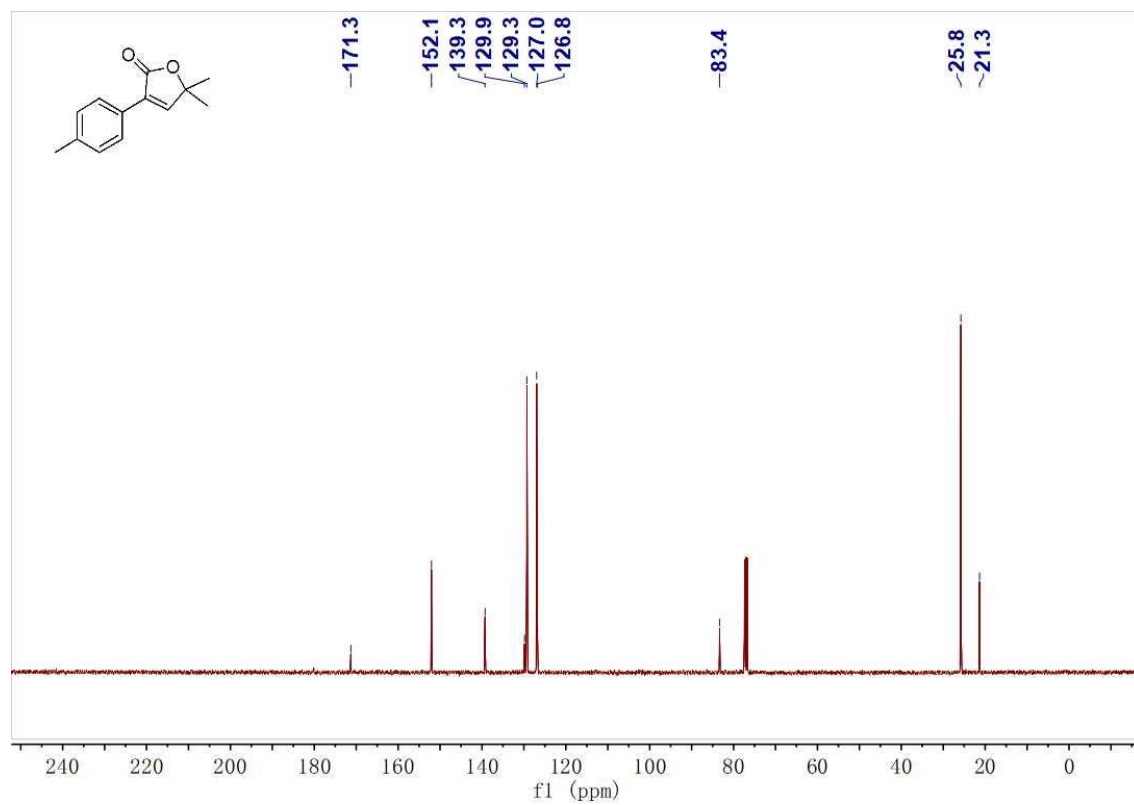

2c

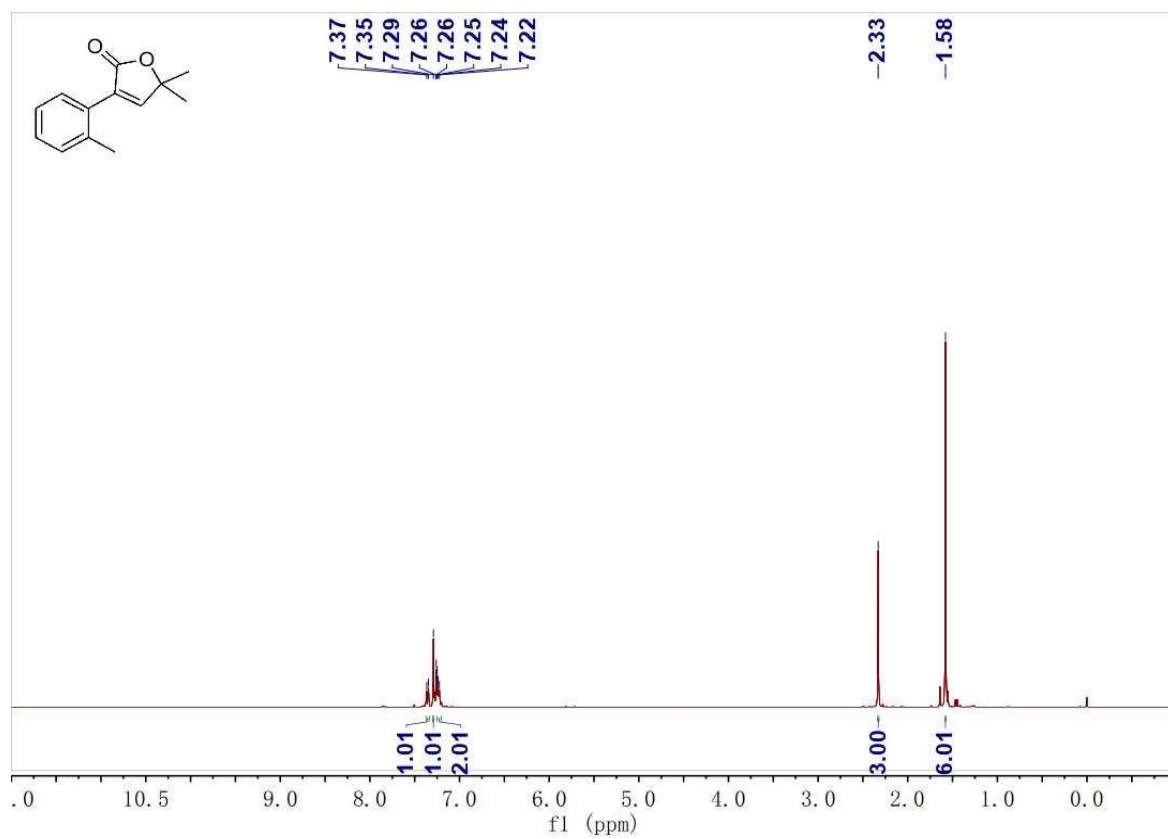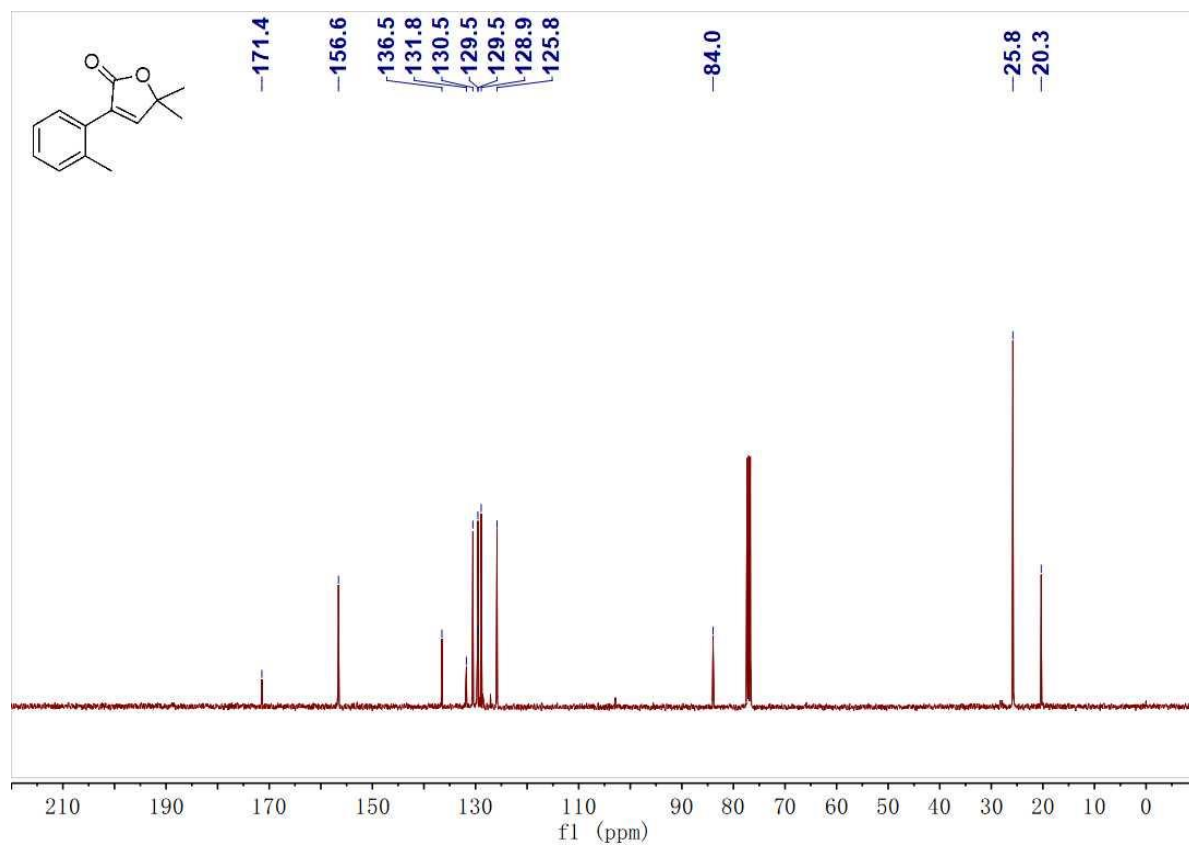



# 2d

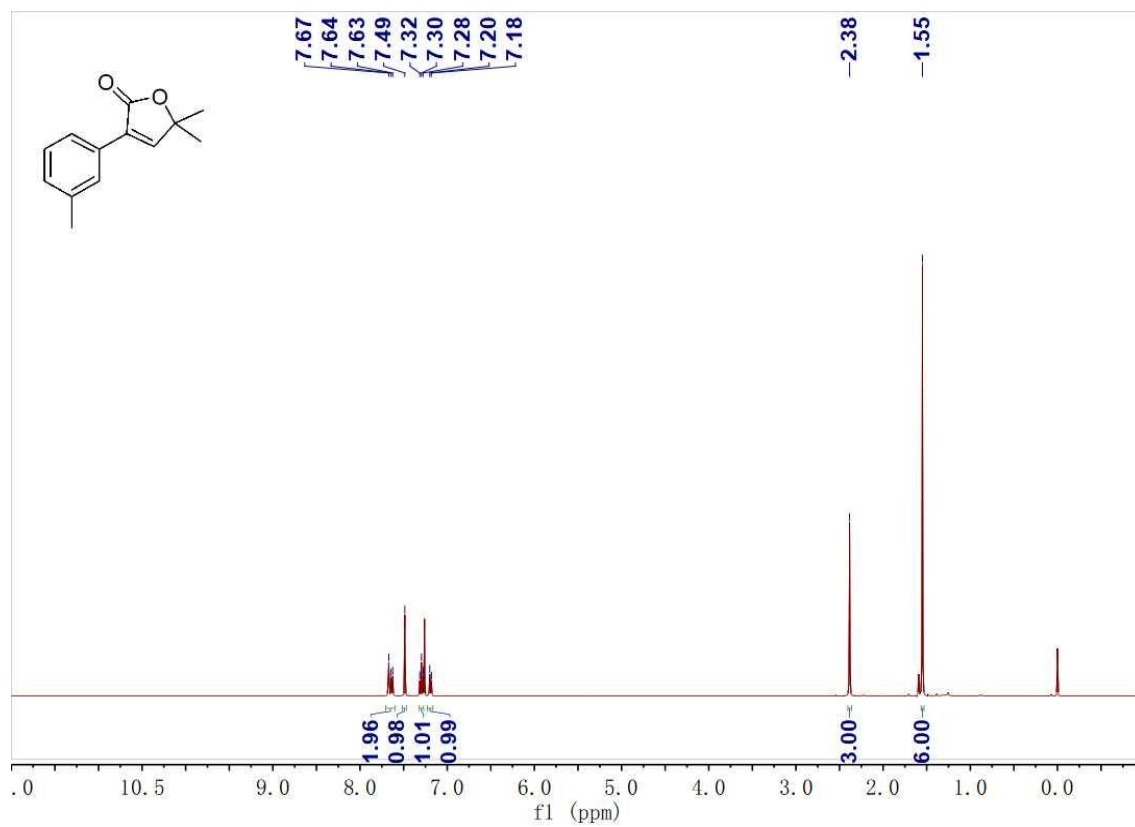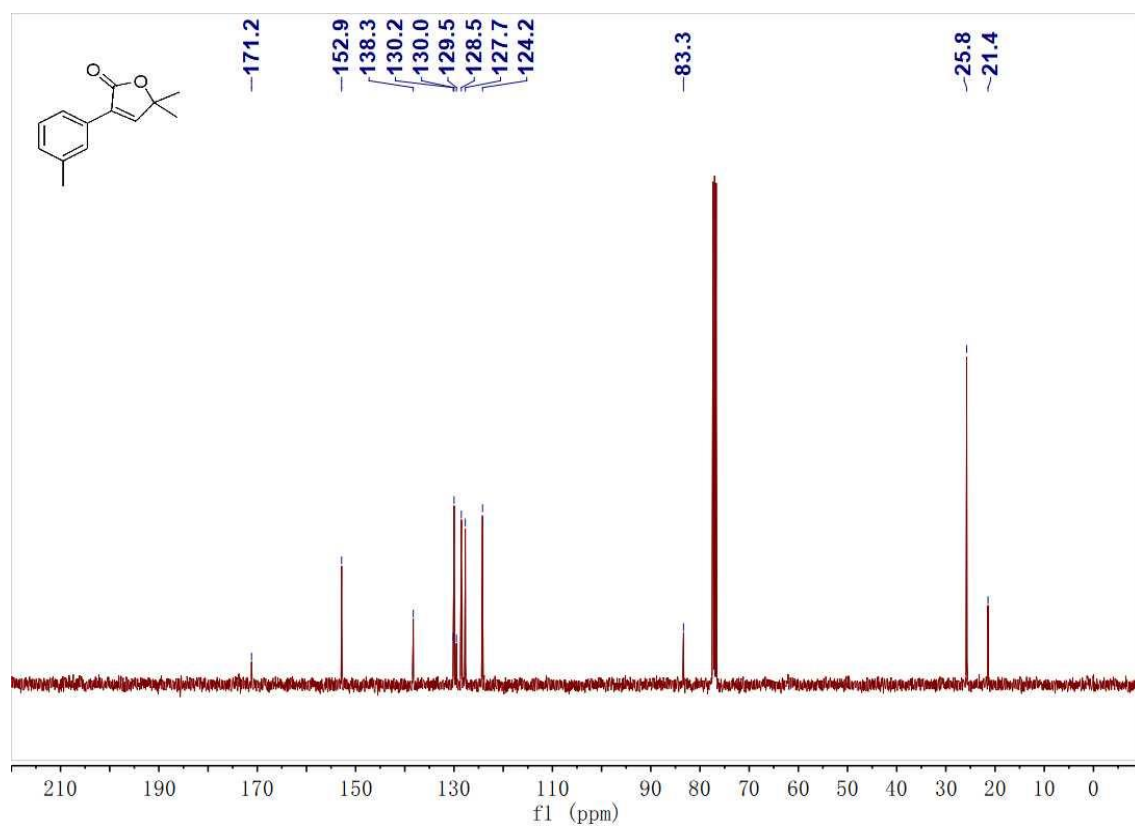

2e

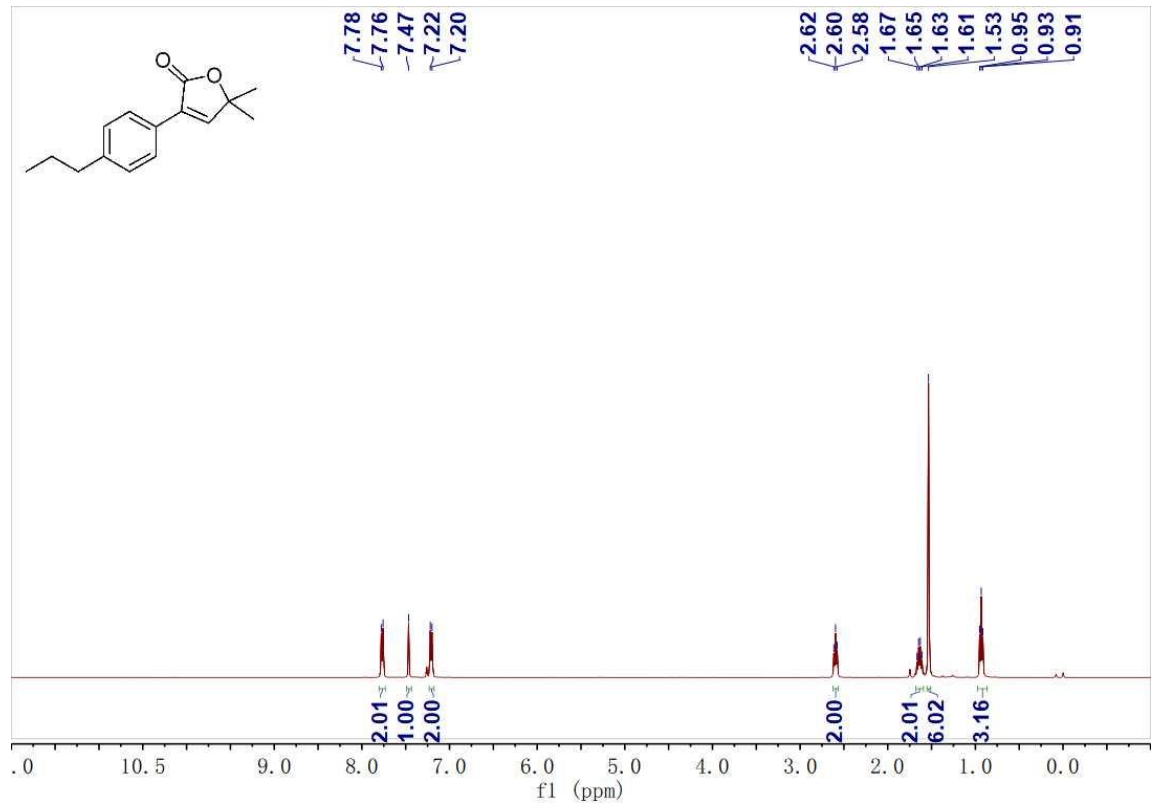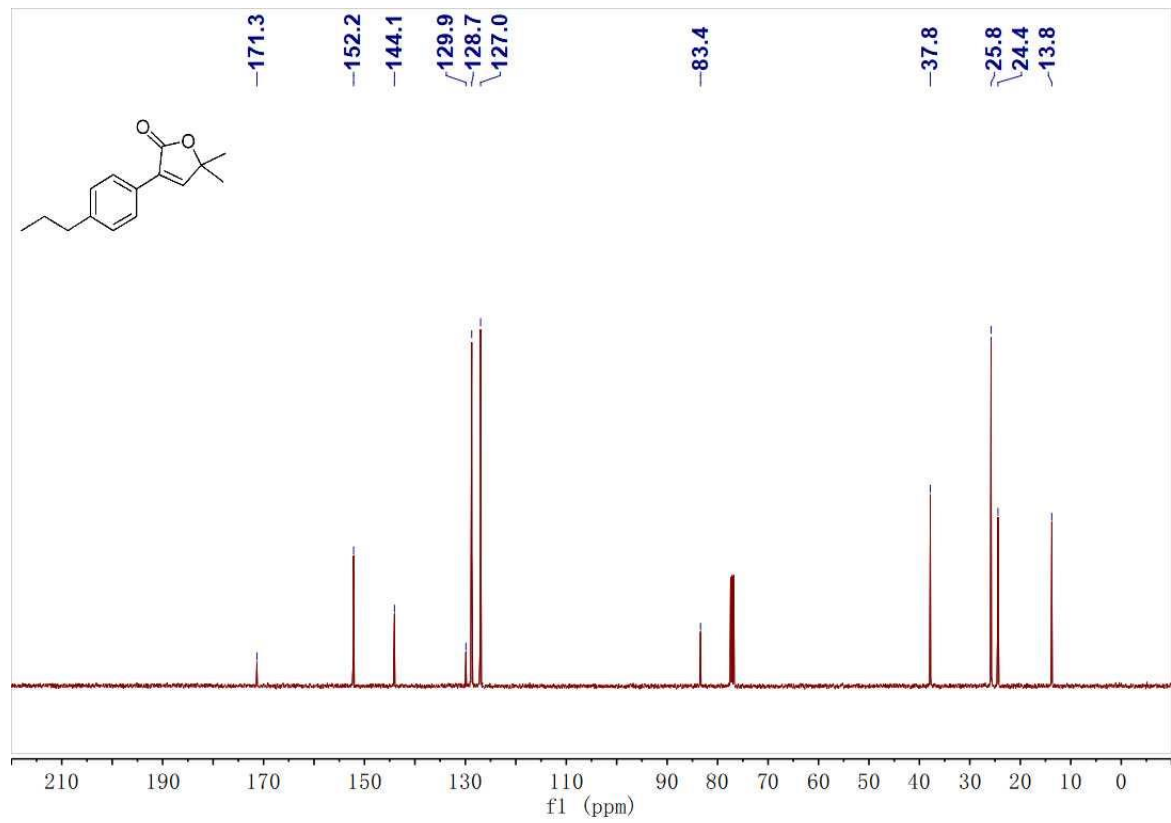

2f

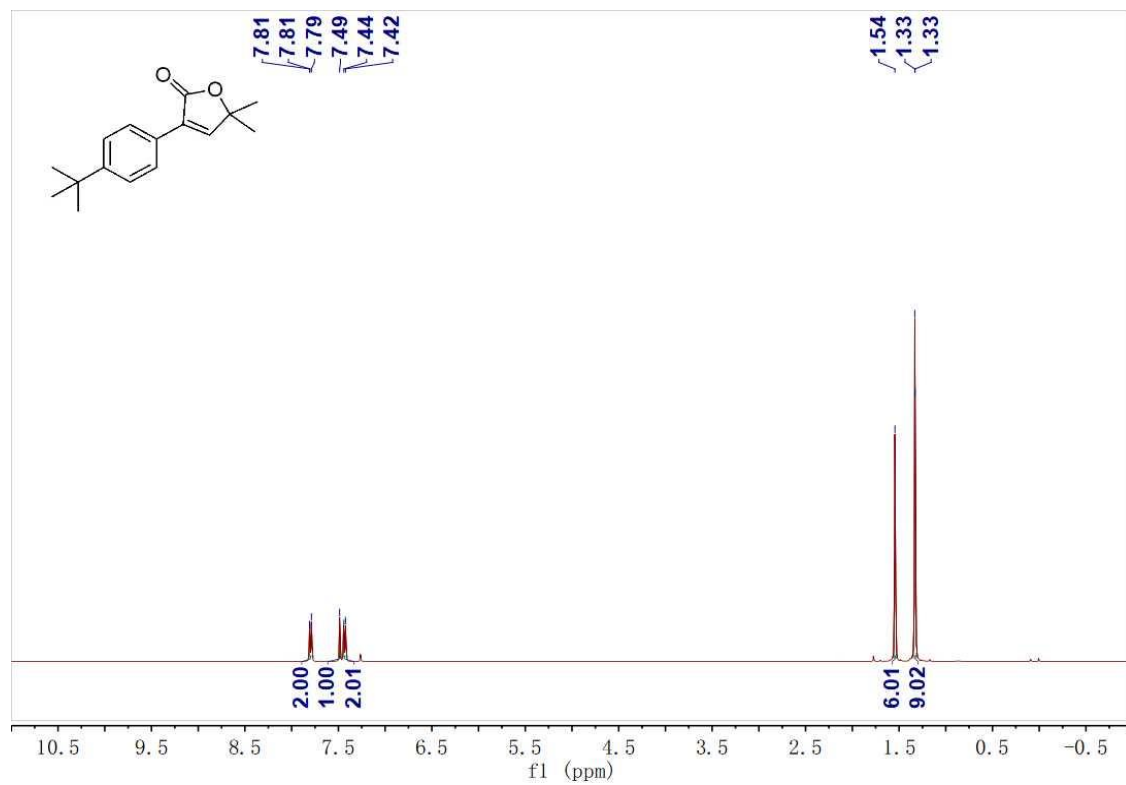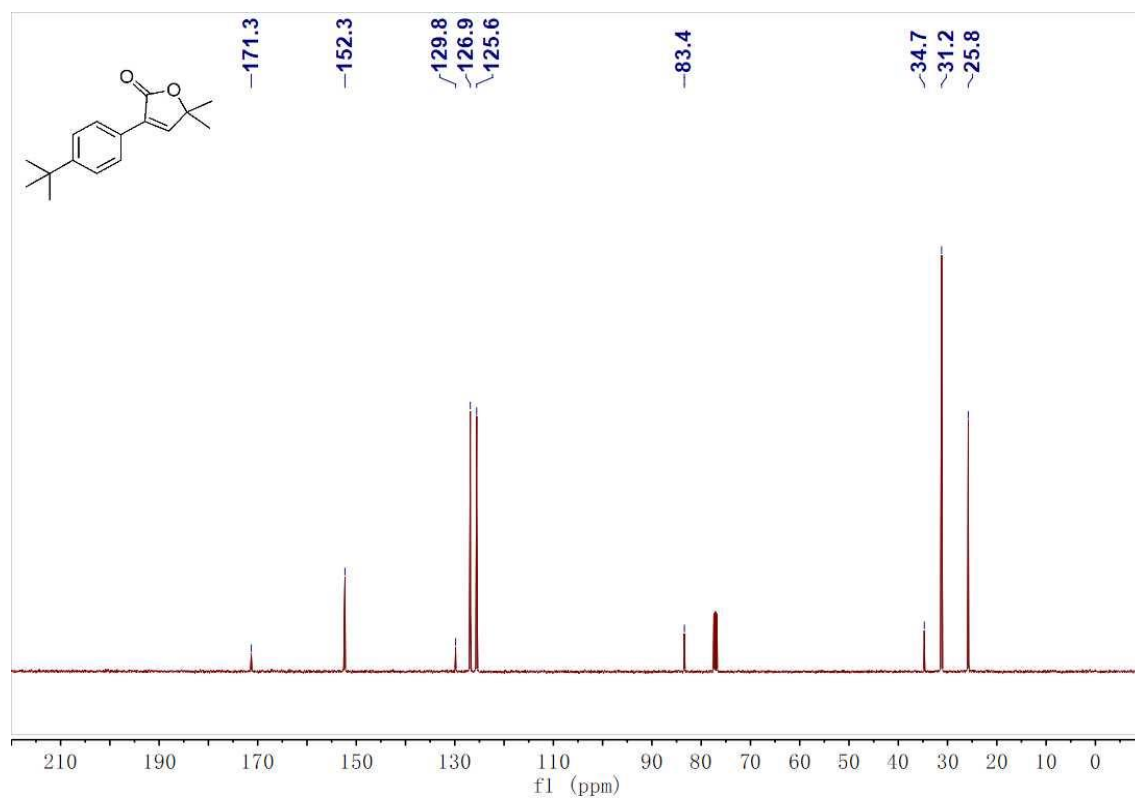

S51

2g

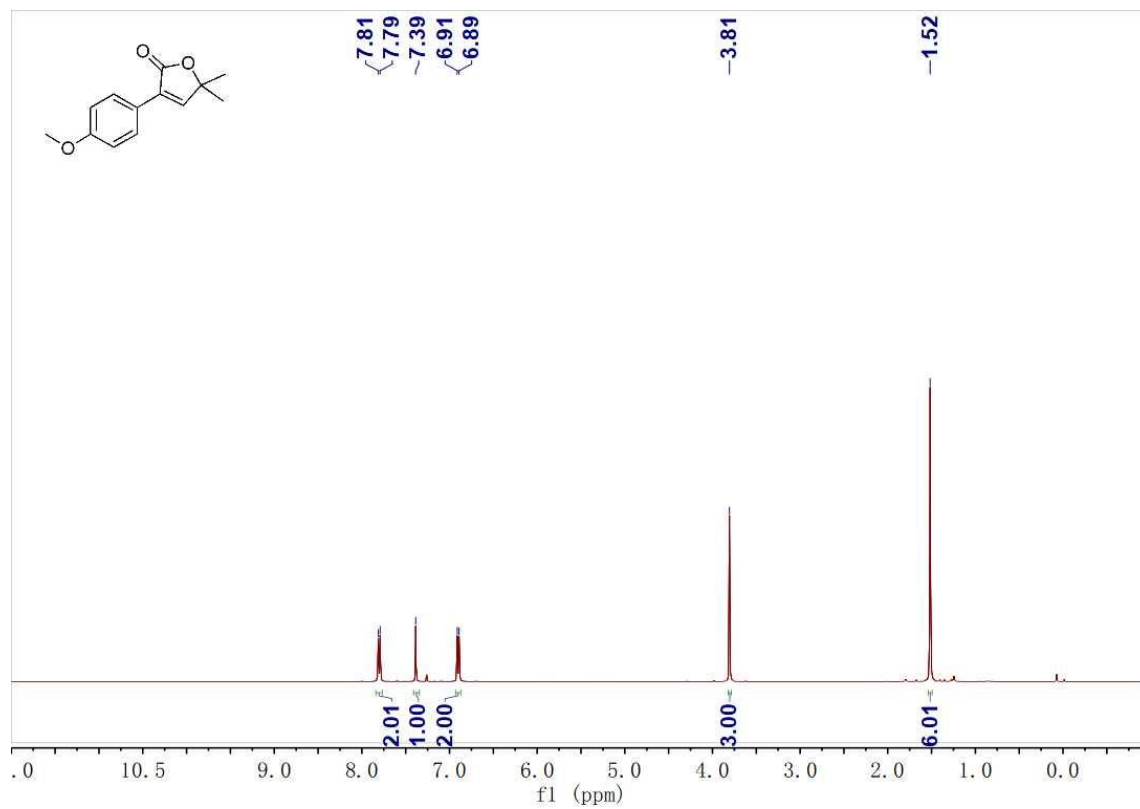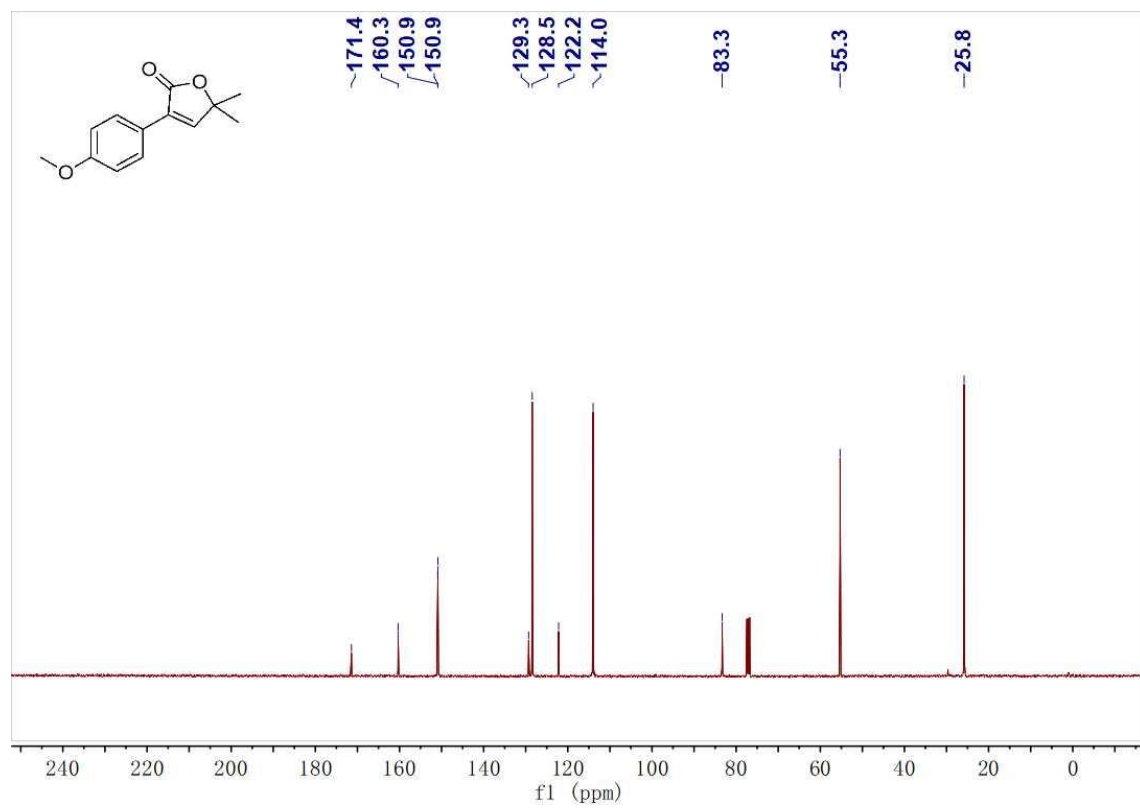

S52

## 2h

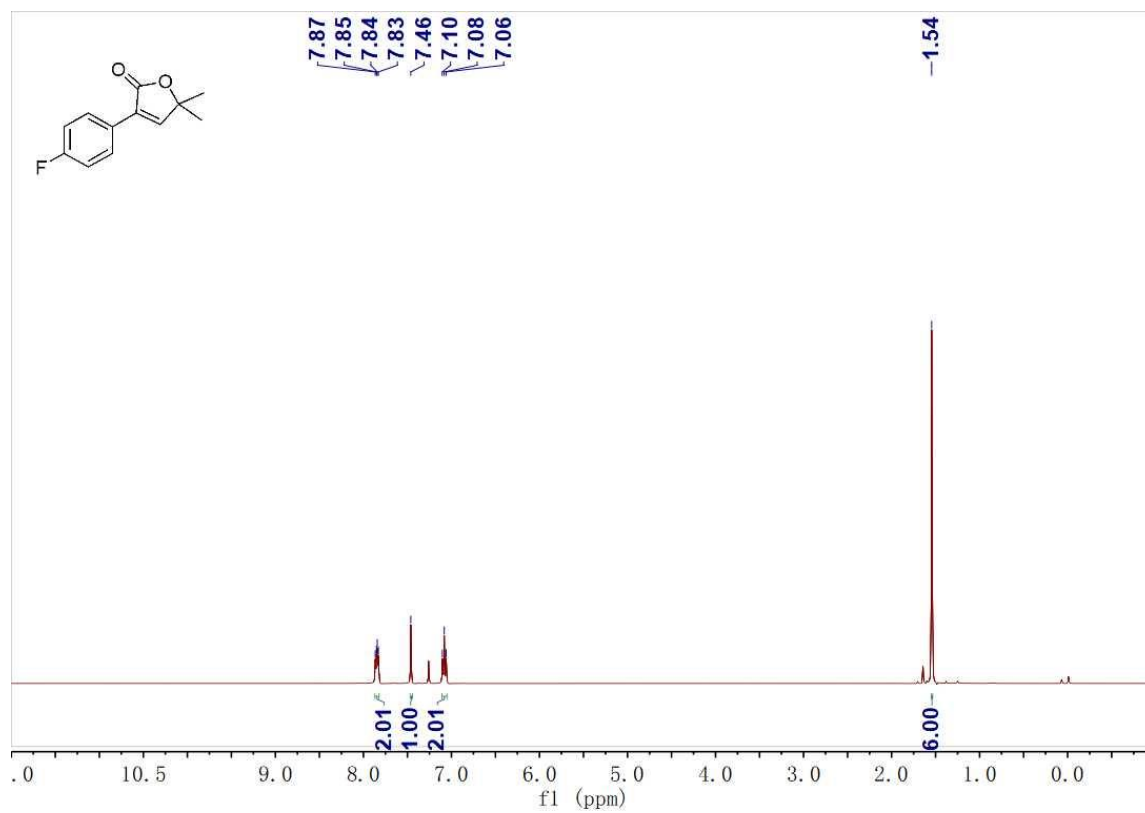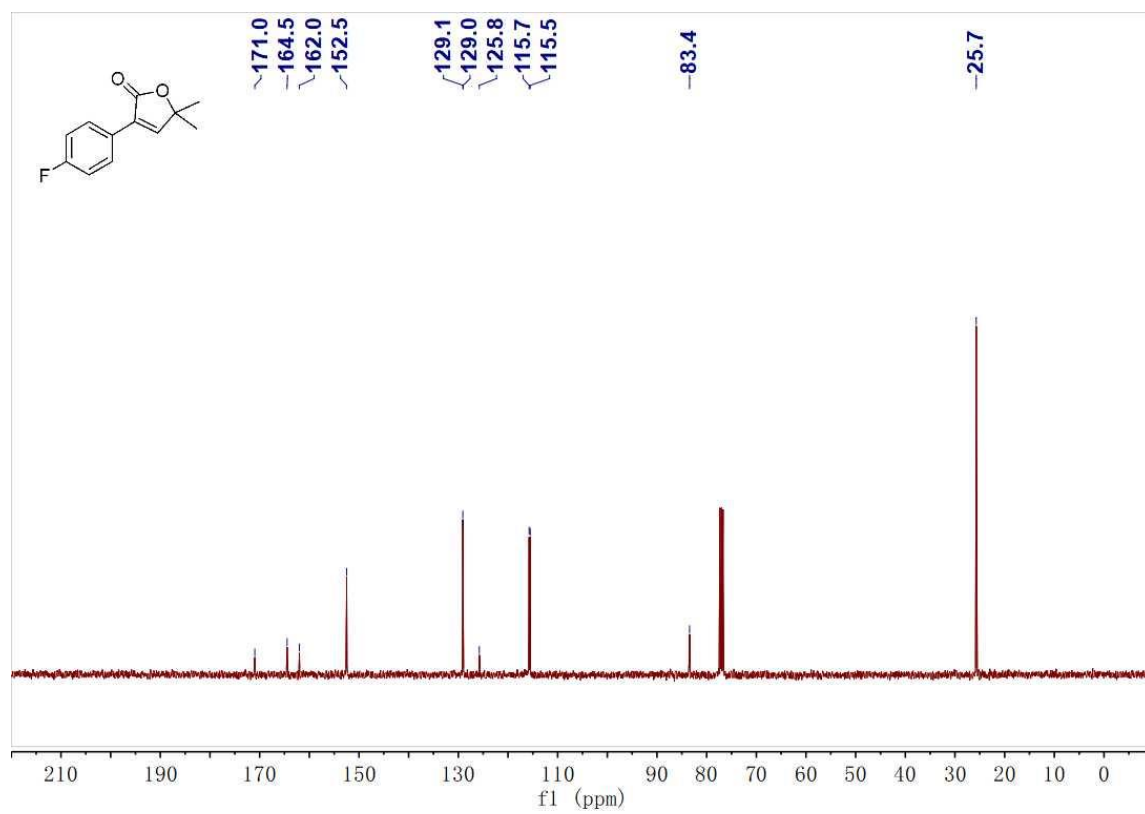

2i

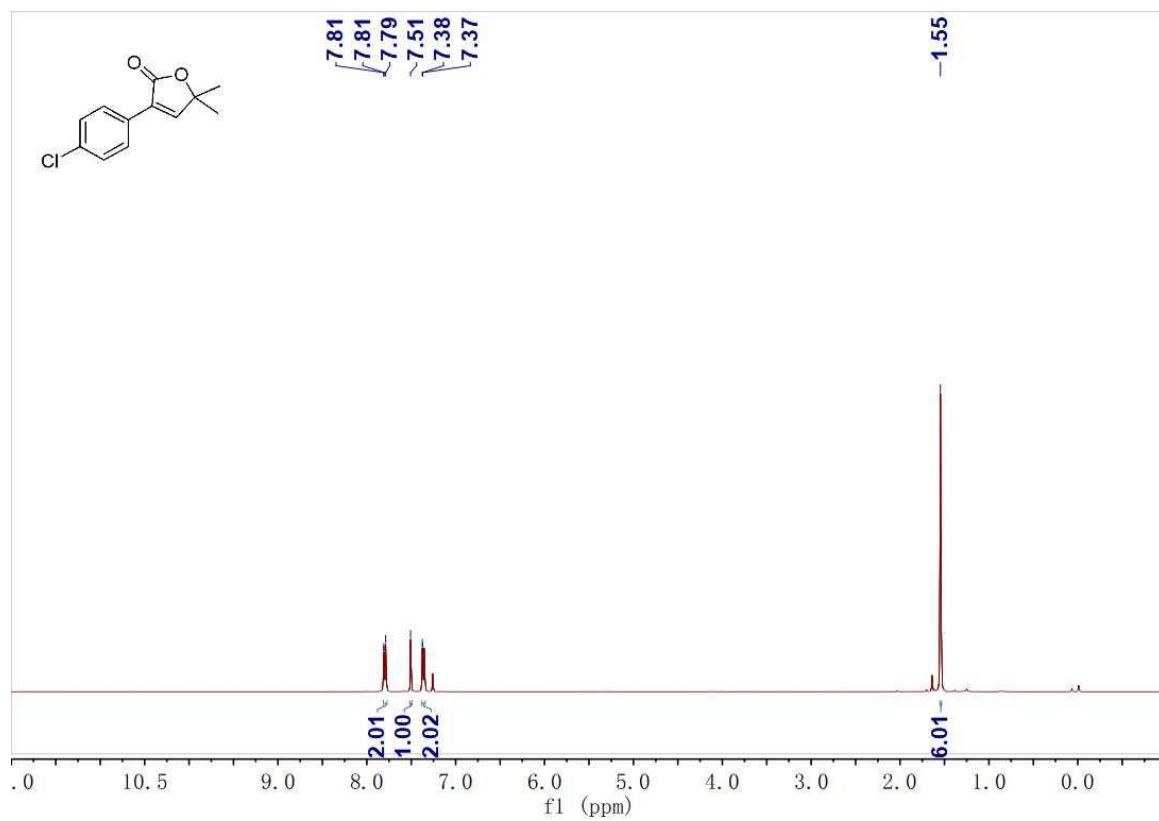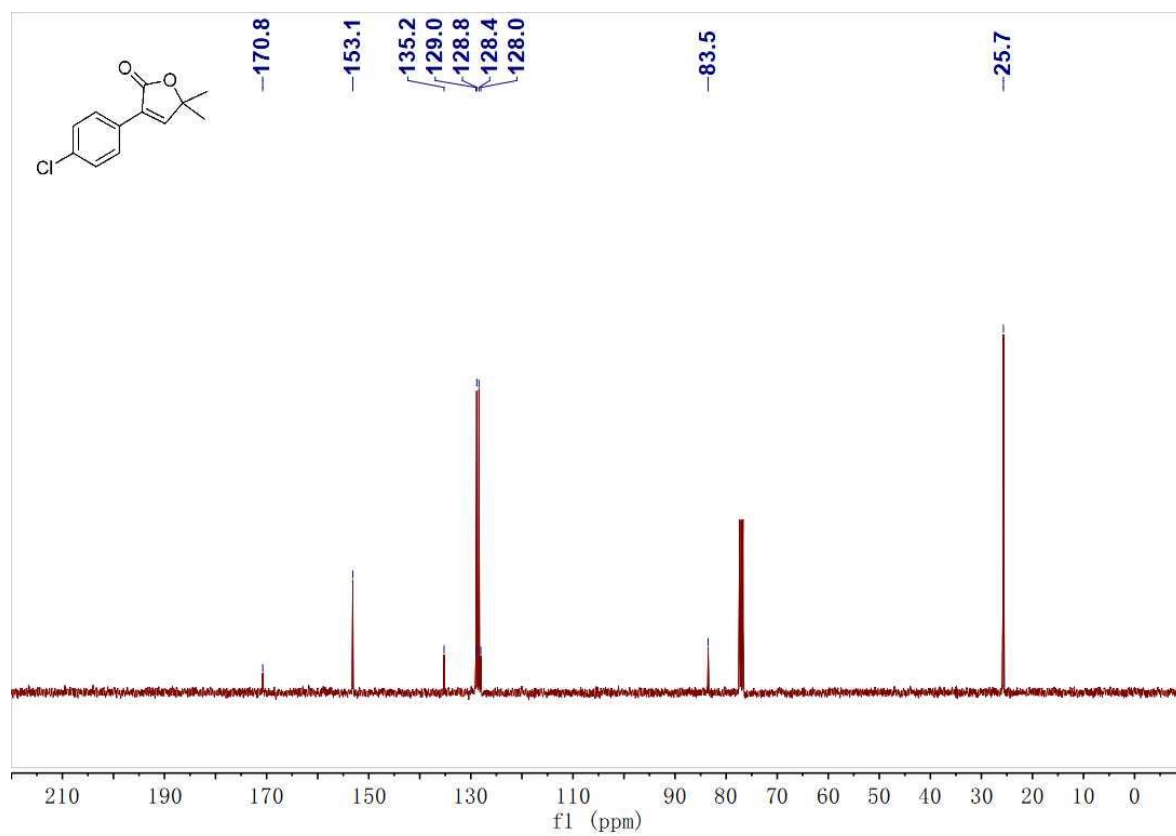

S54

2j

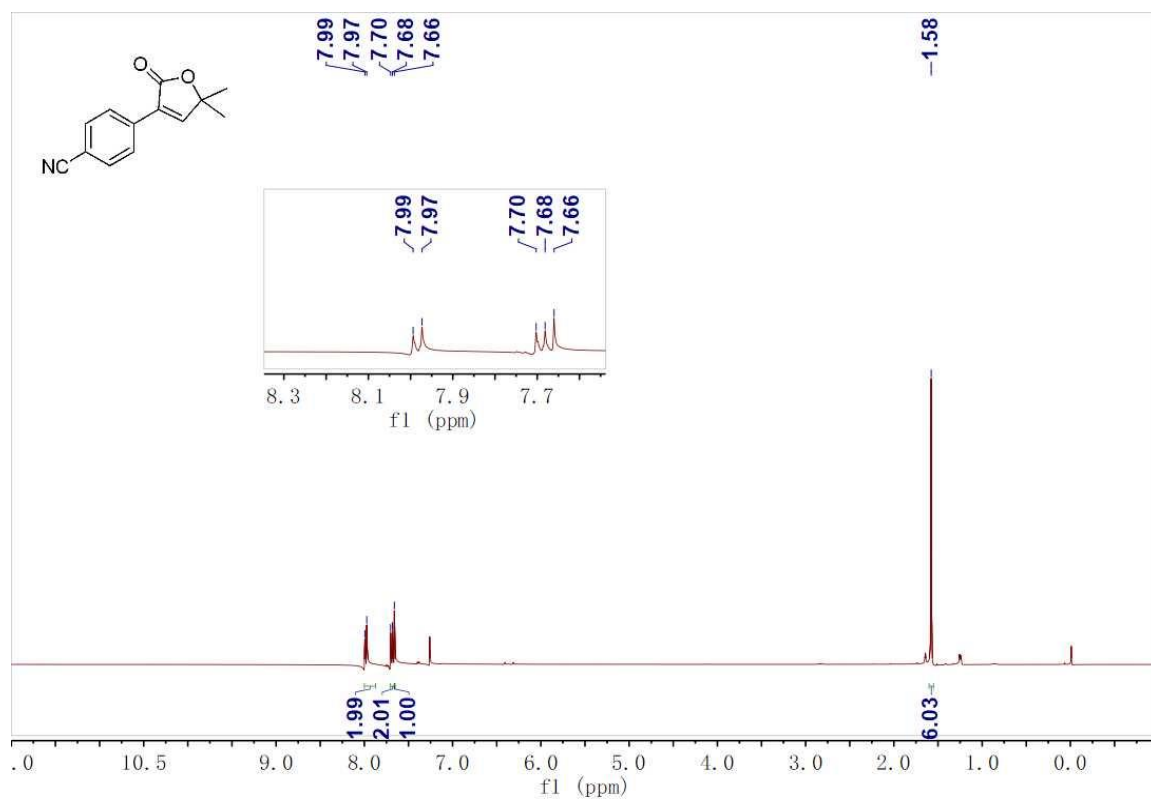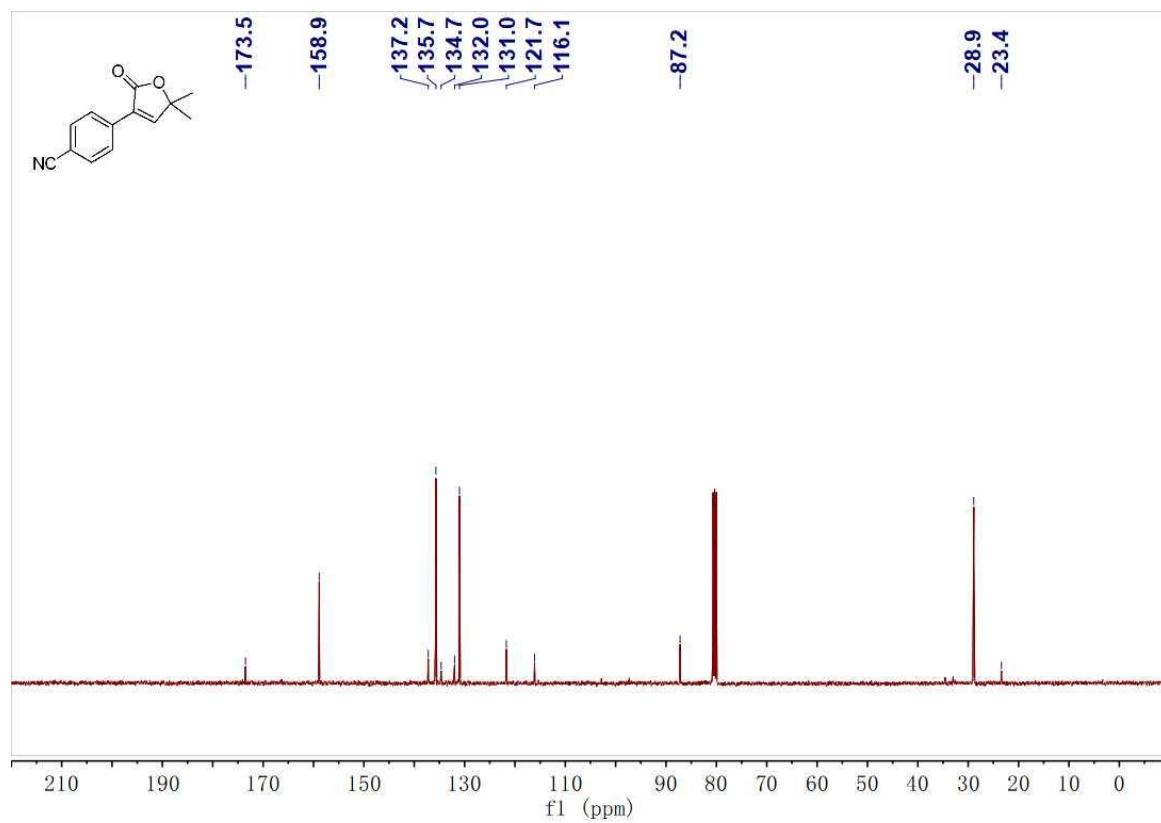

# 2k

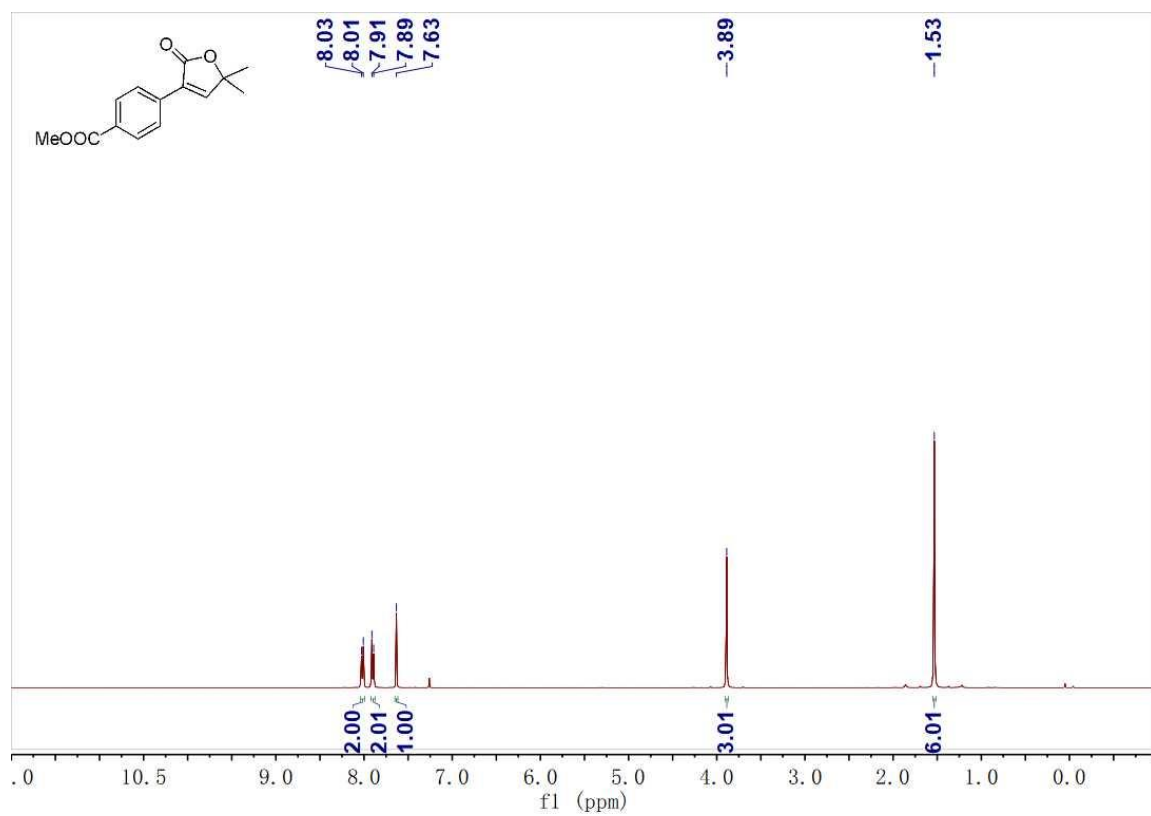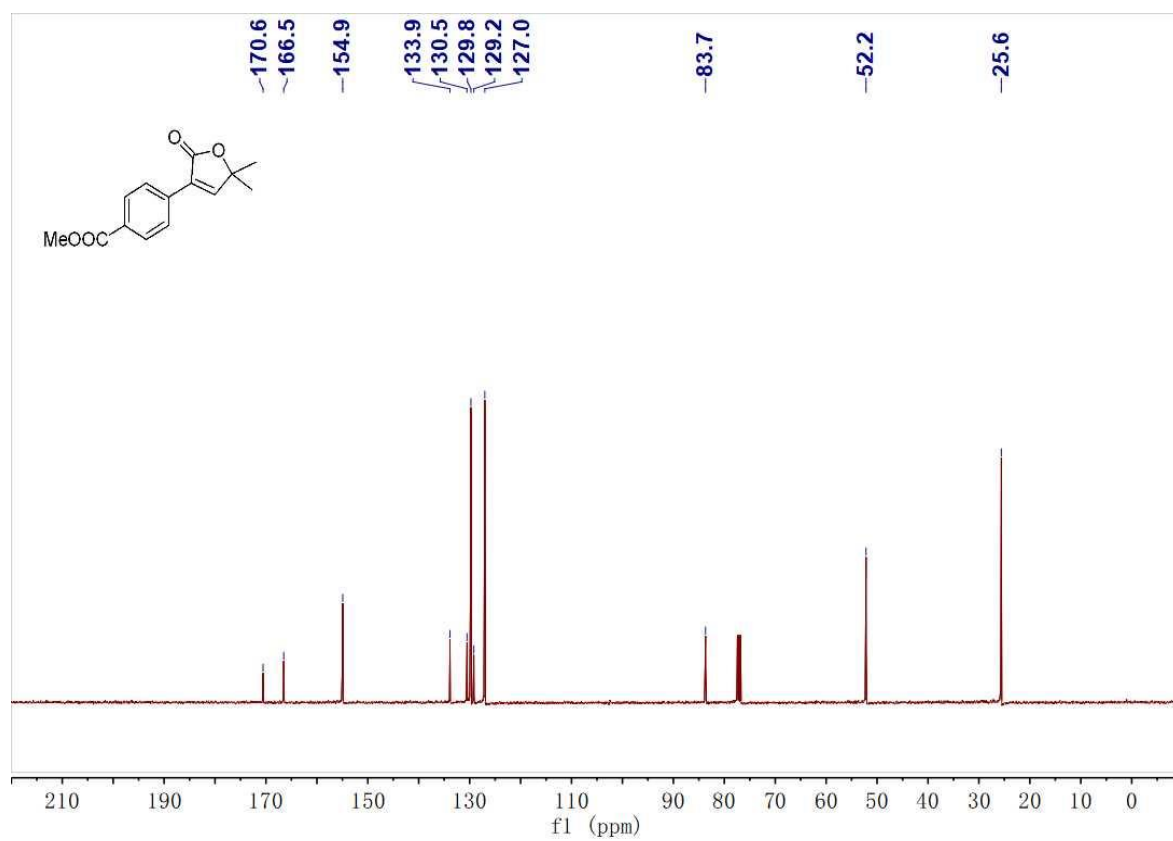



21

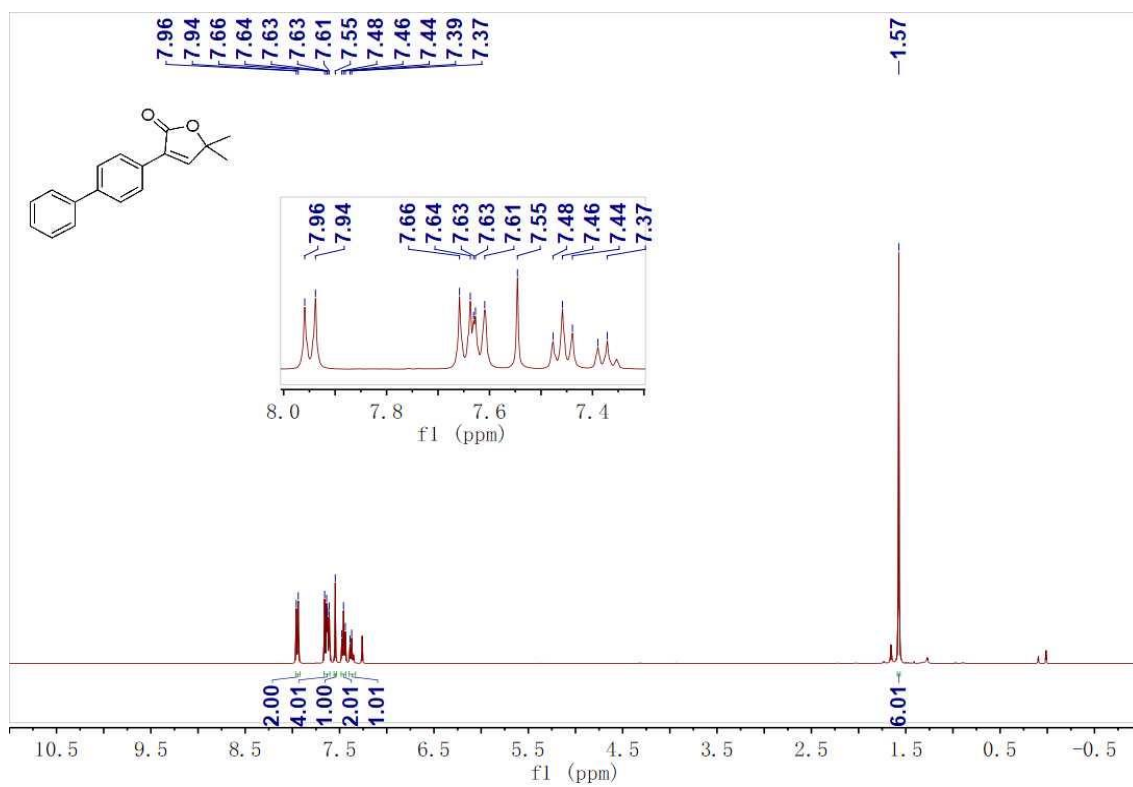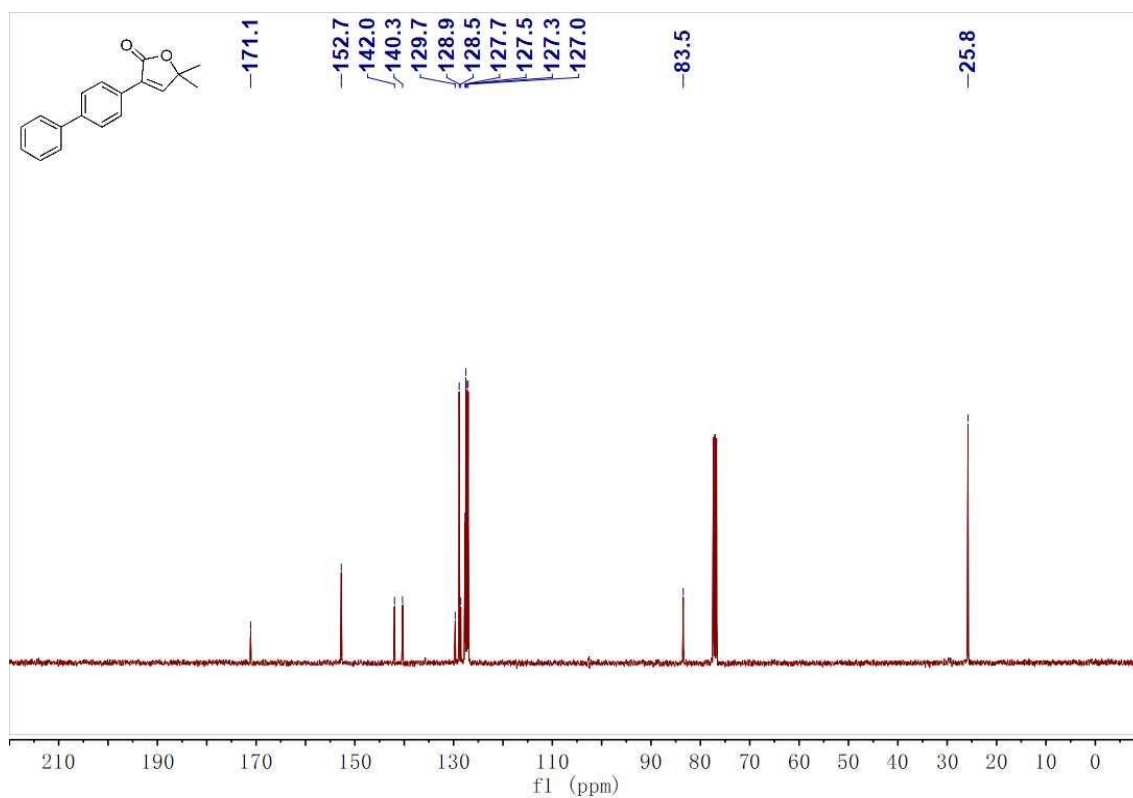

S57

# 2m

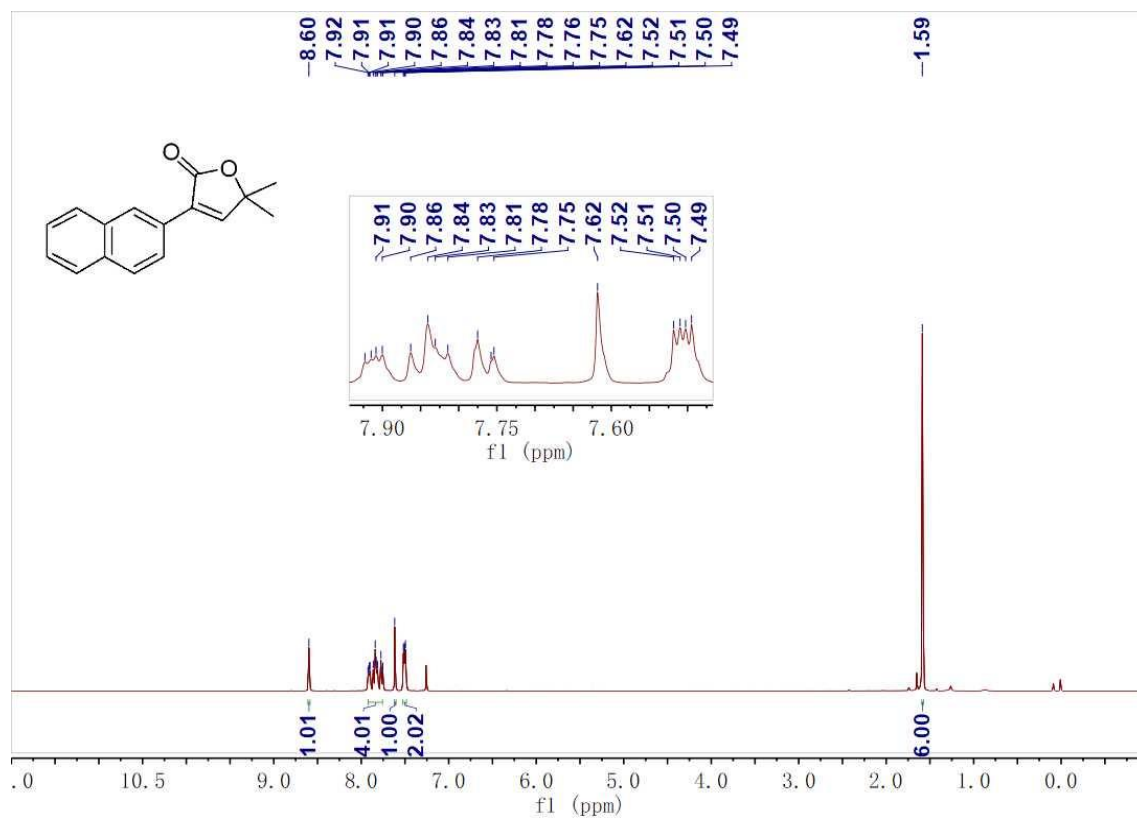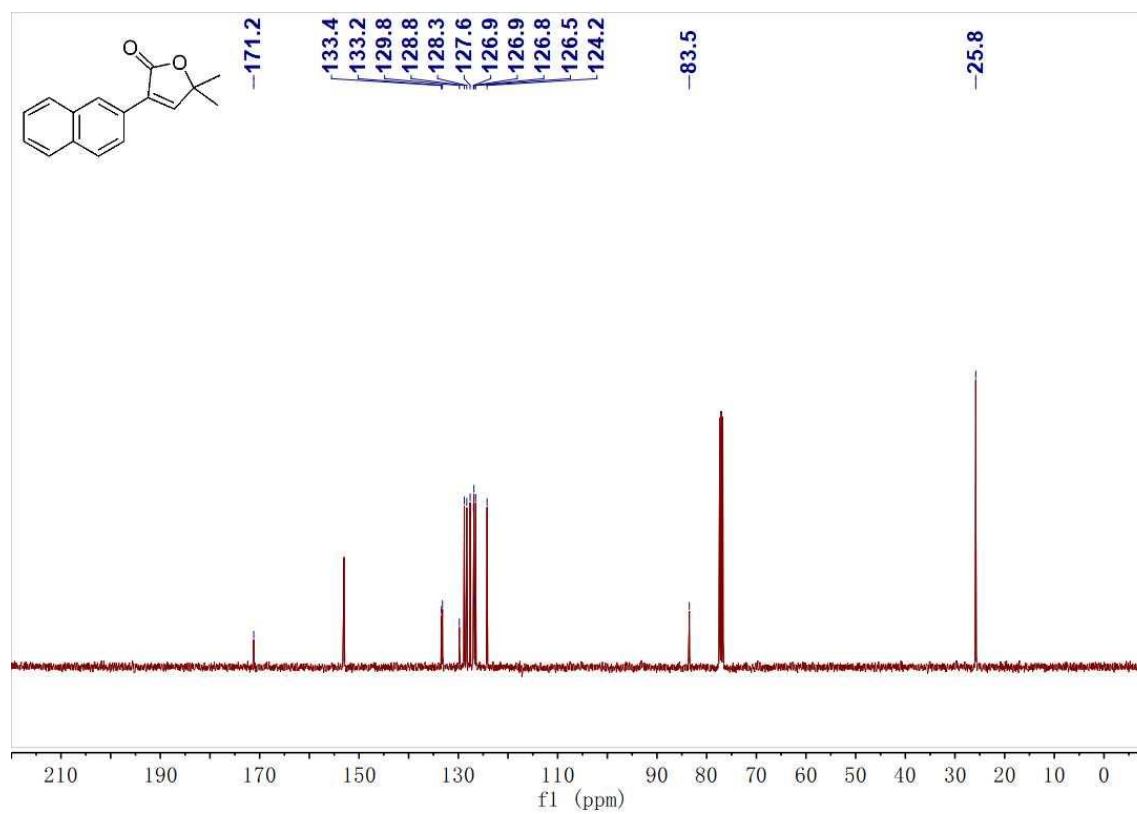

# 2n

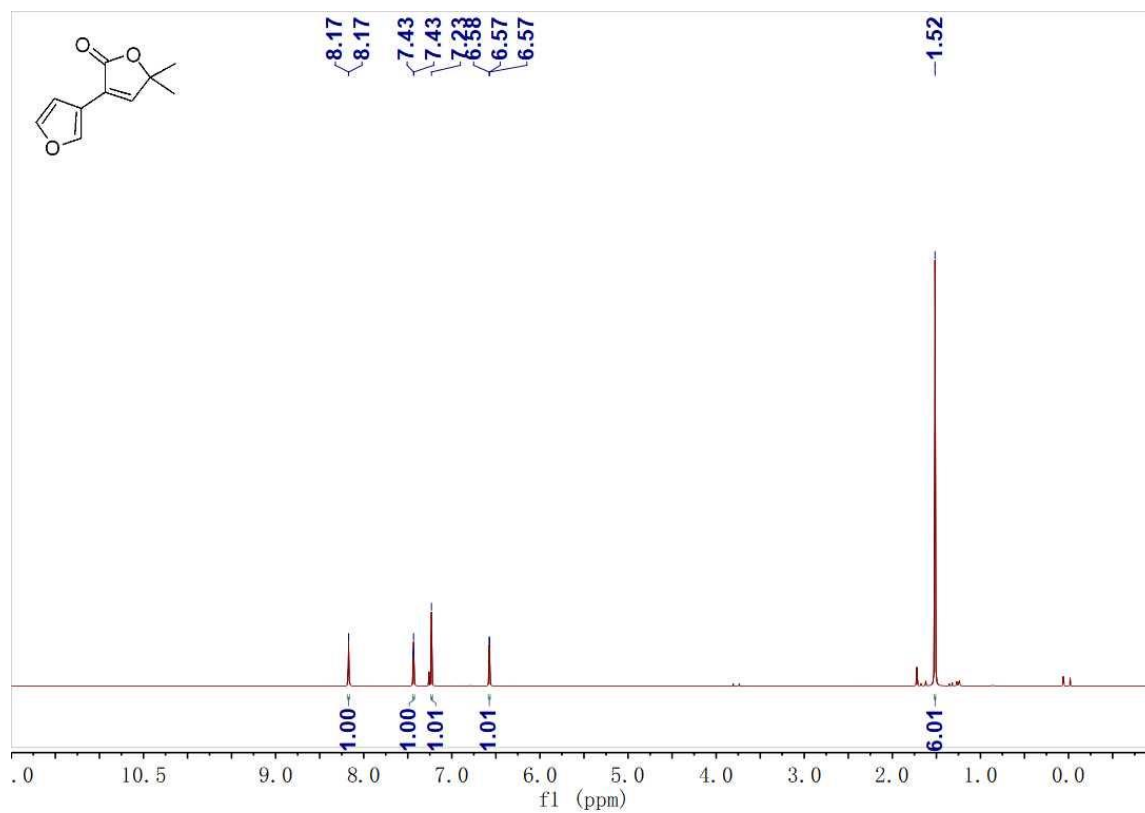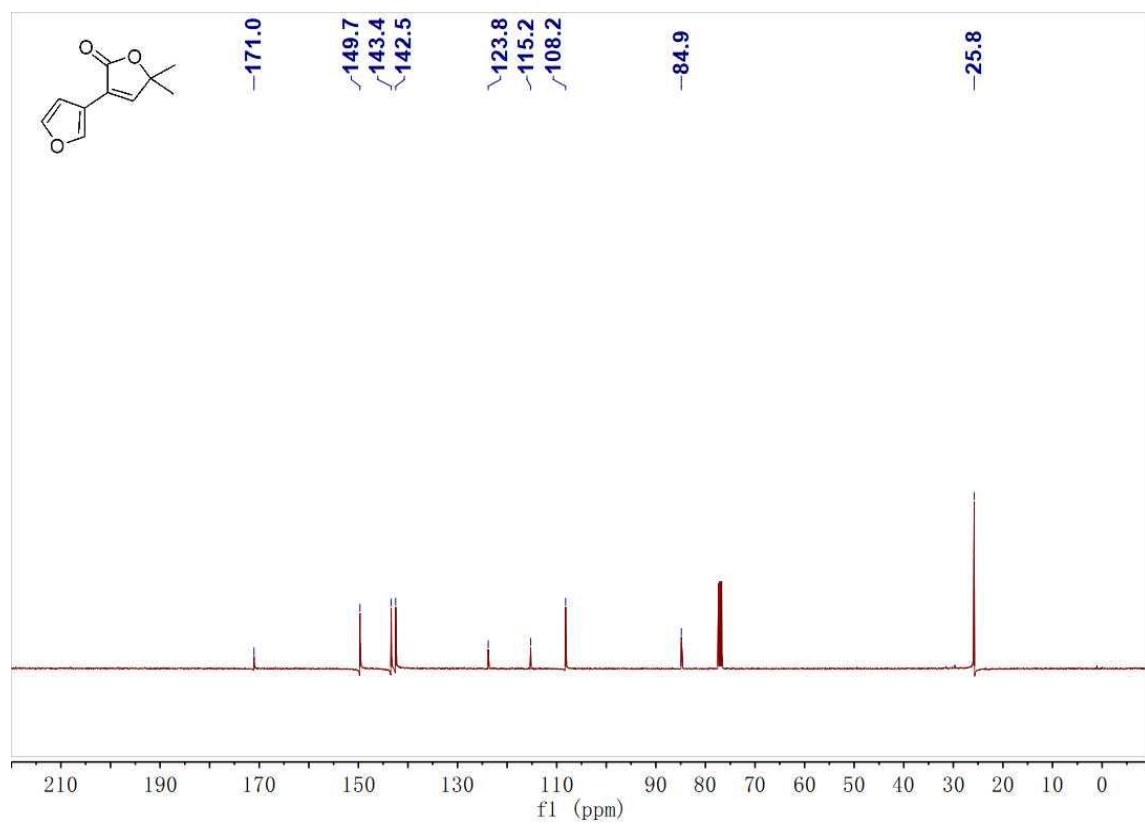

2o

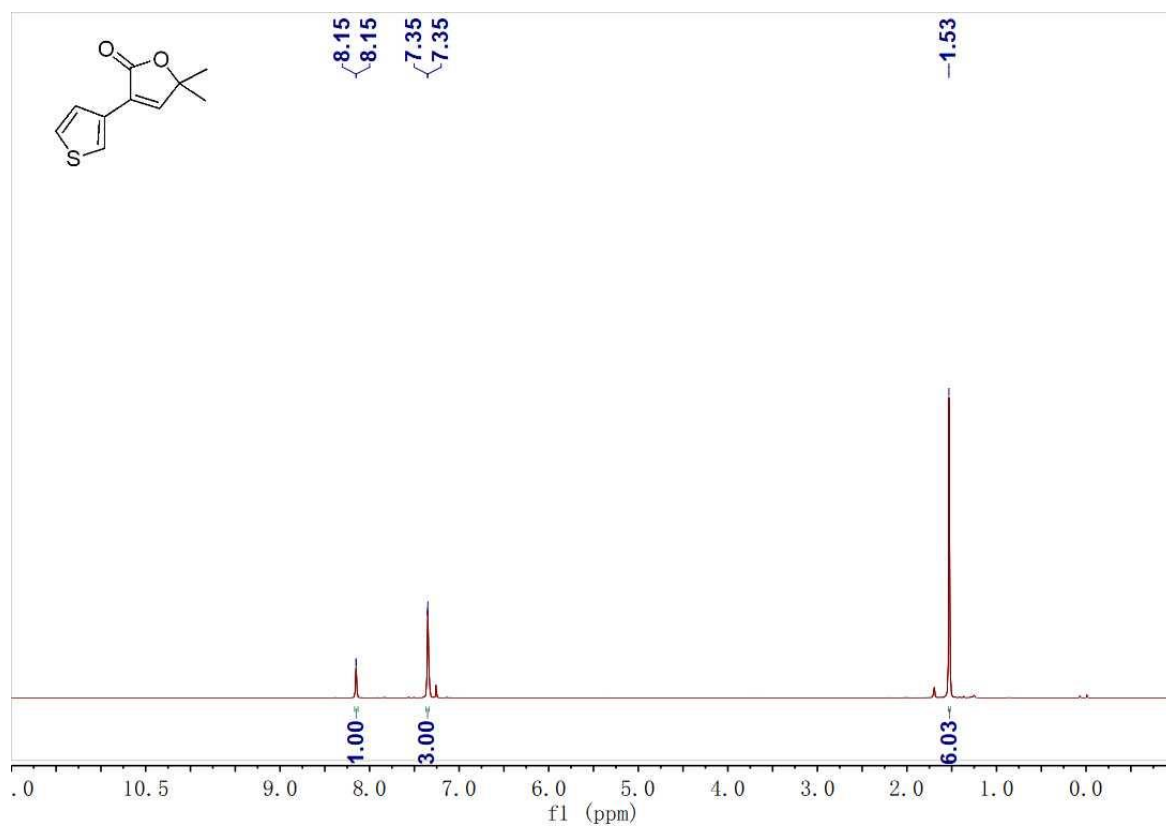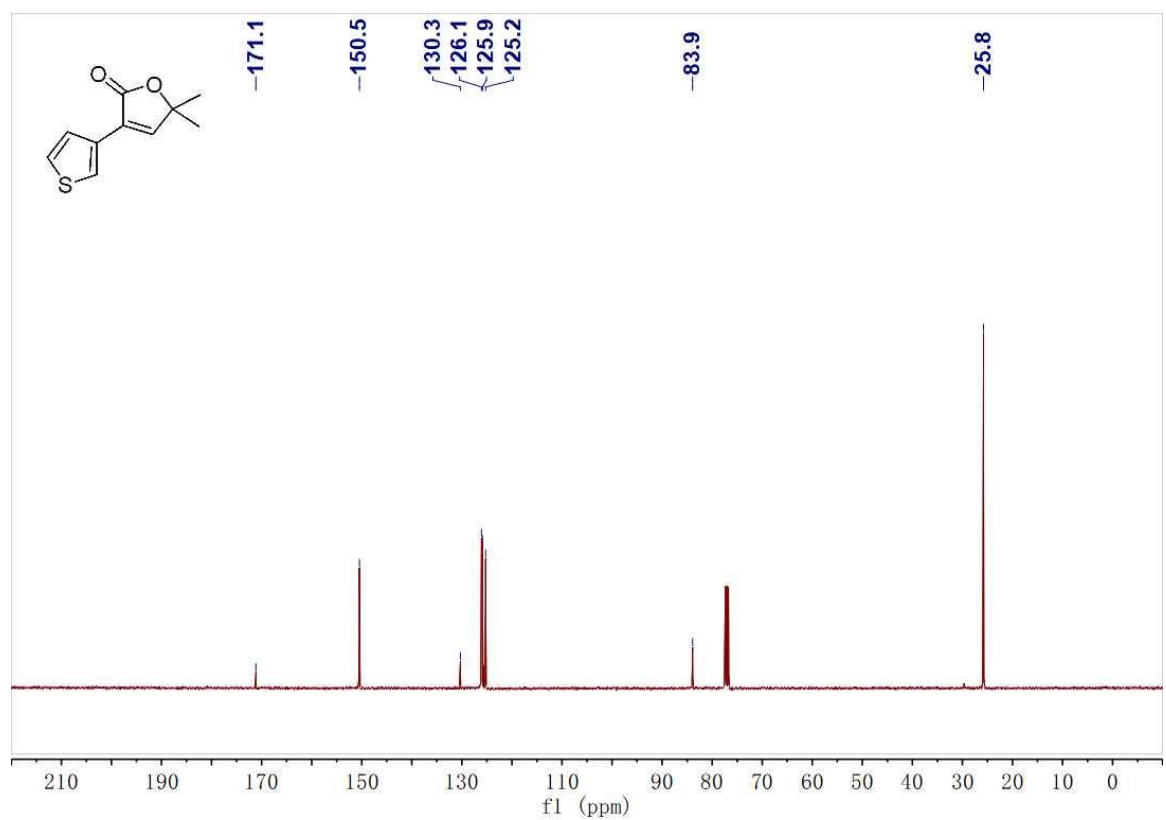

S60

2p

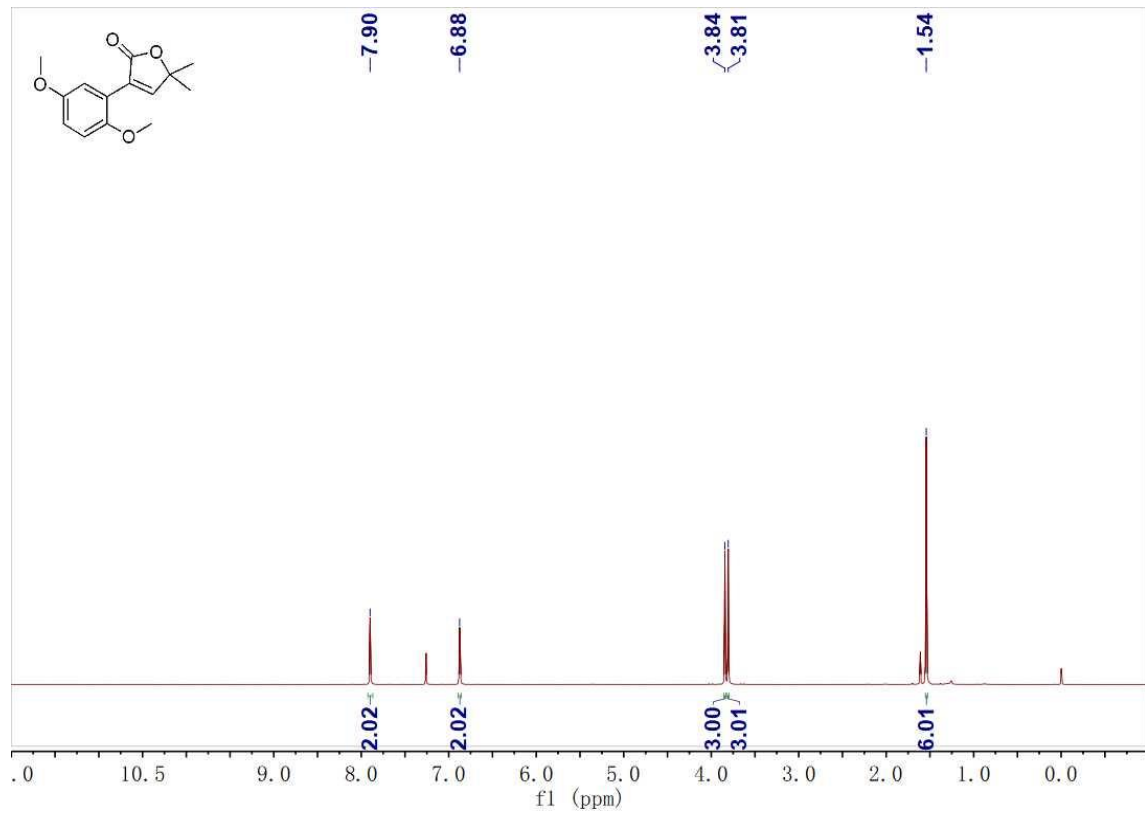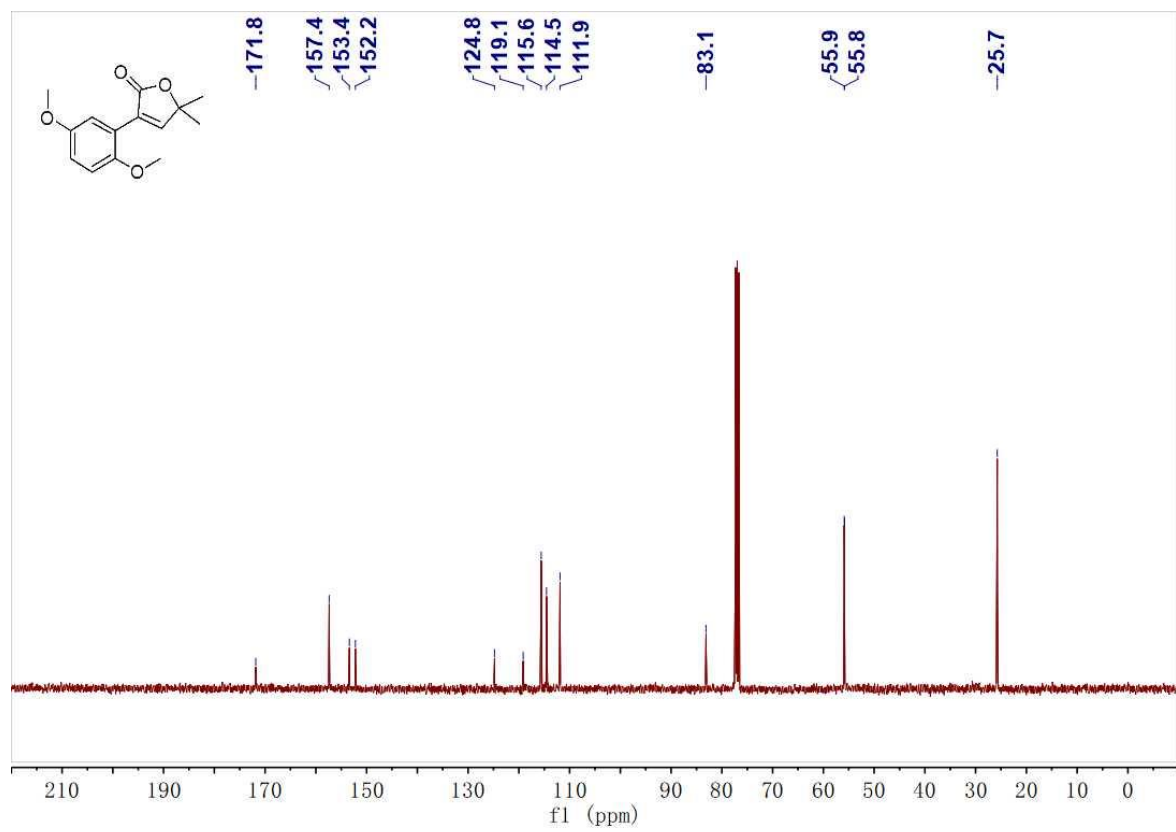

S61

2q

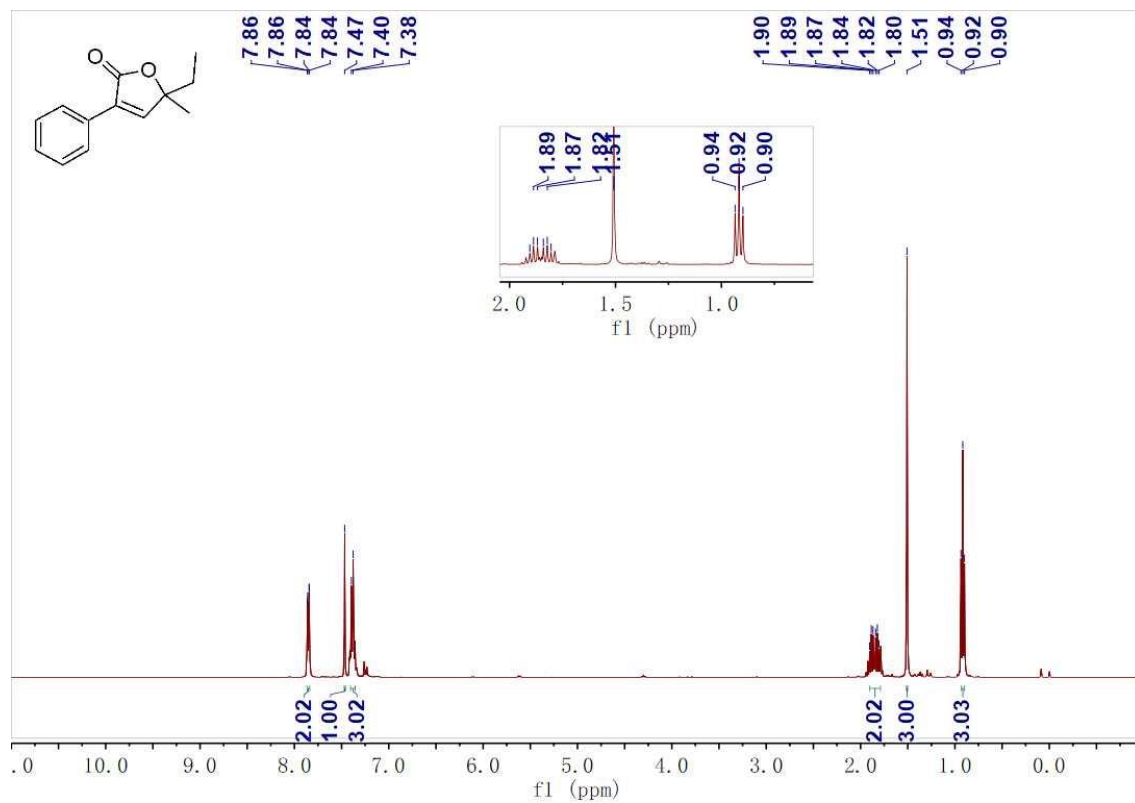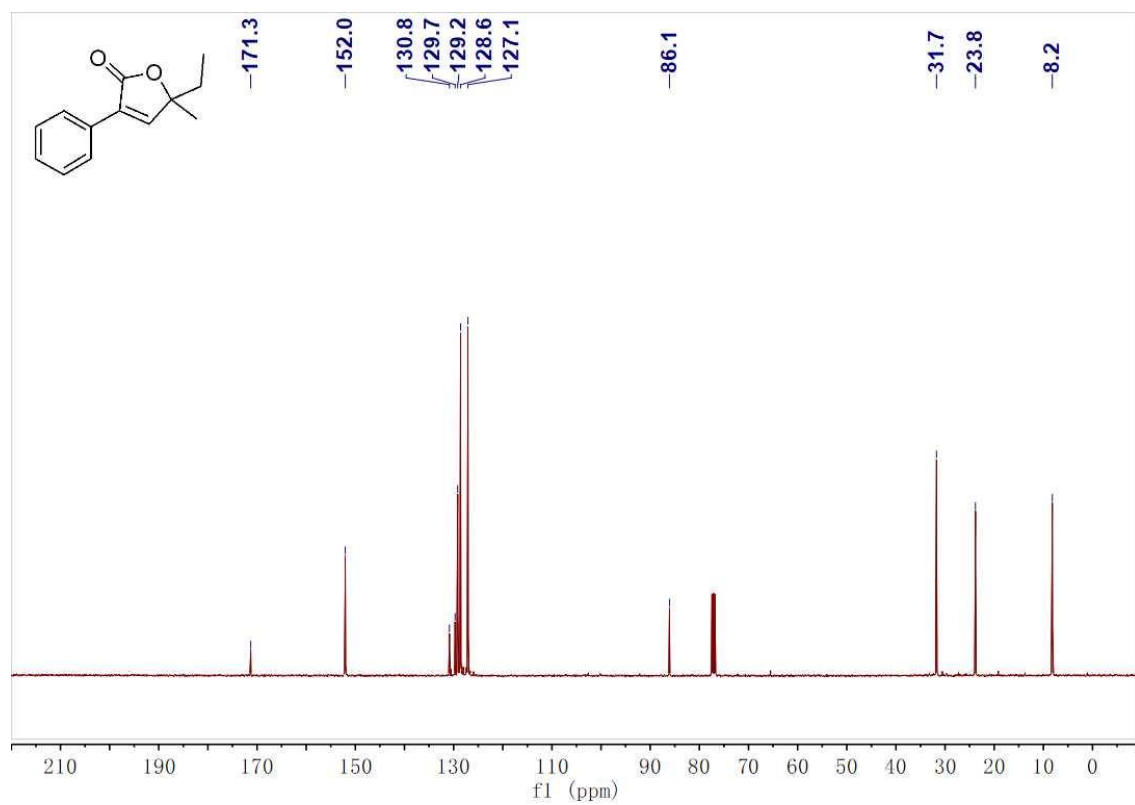

# 2r

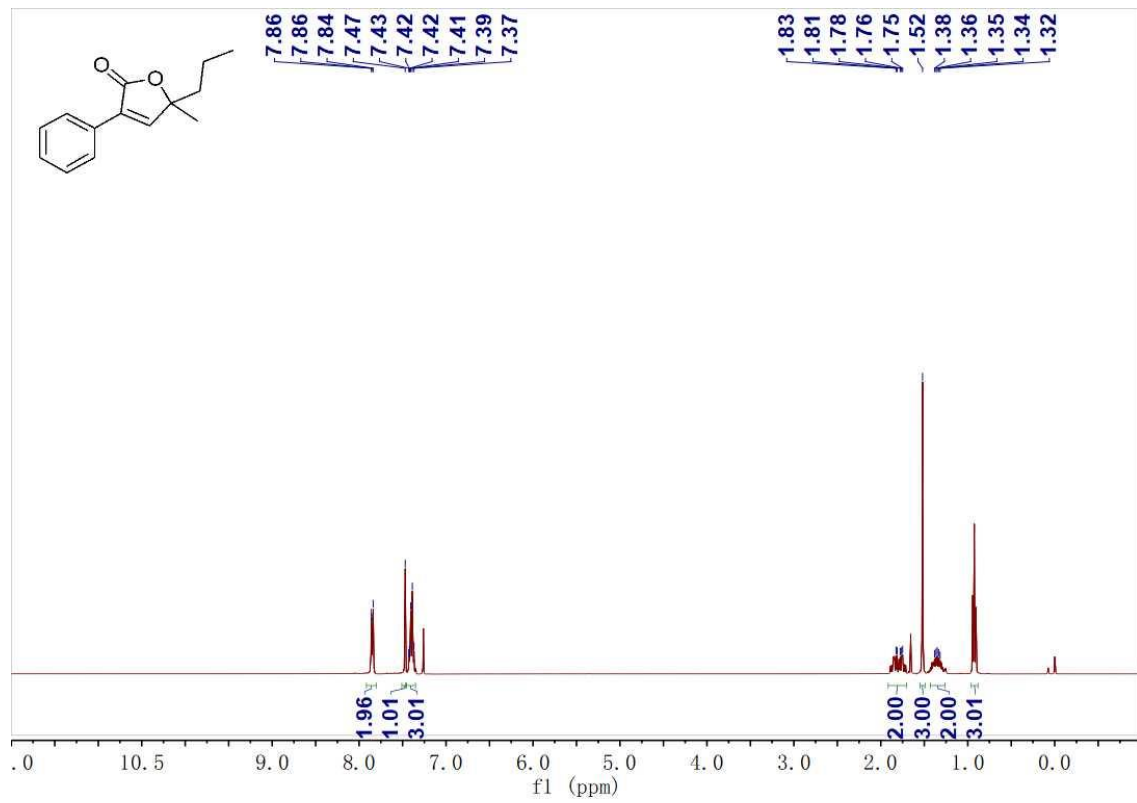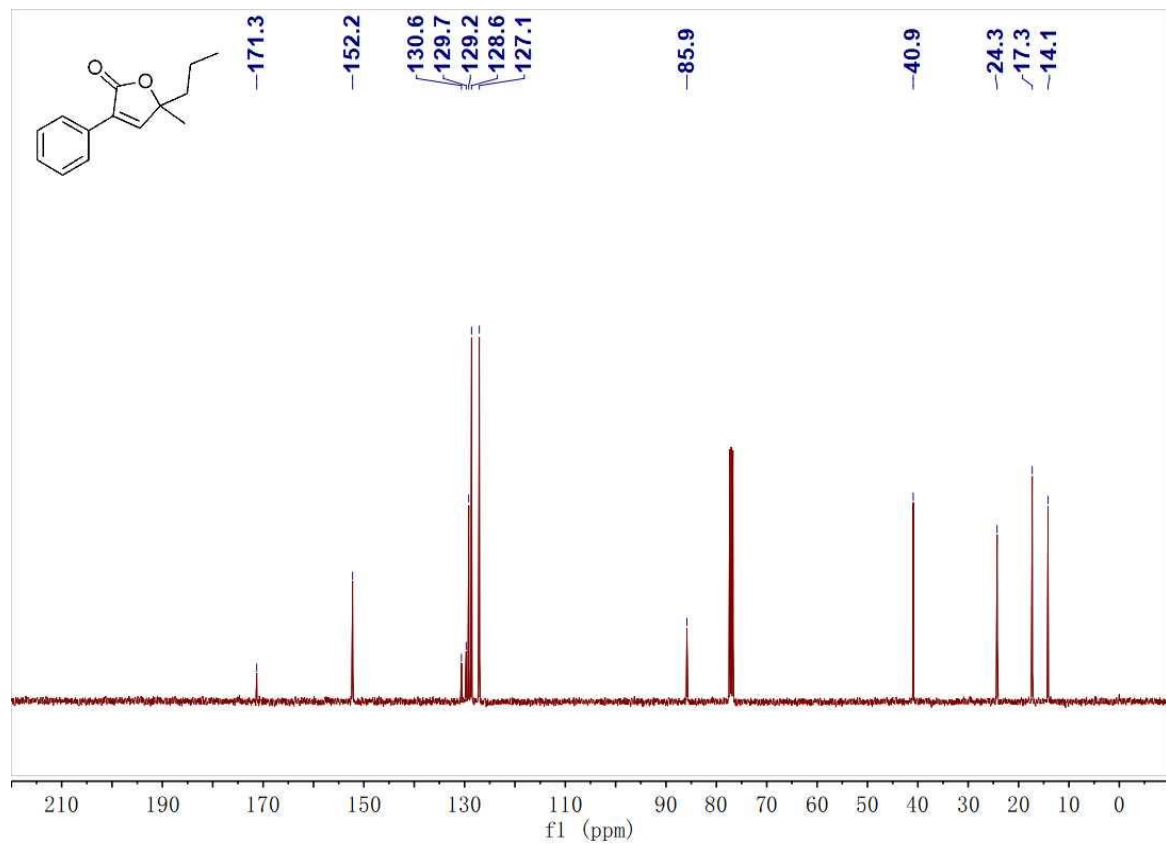

2s

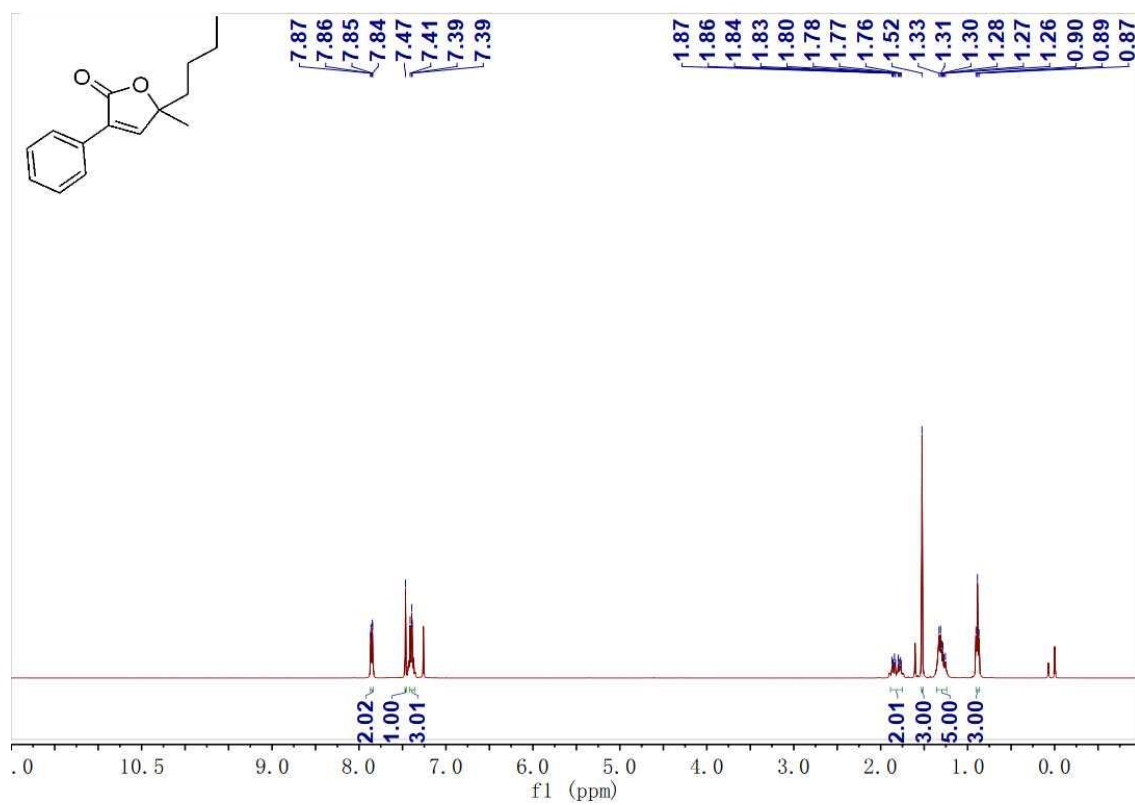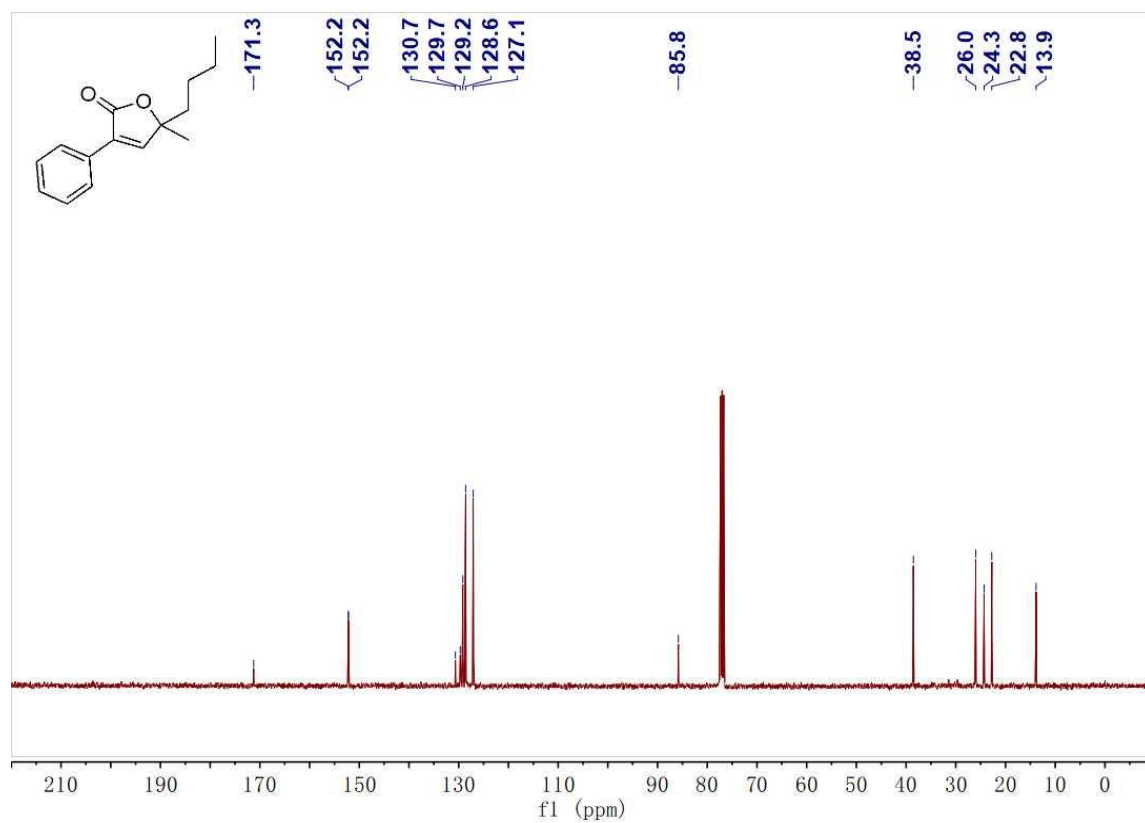

S64



2t

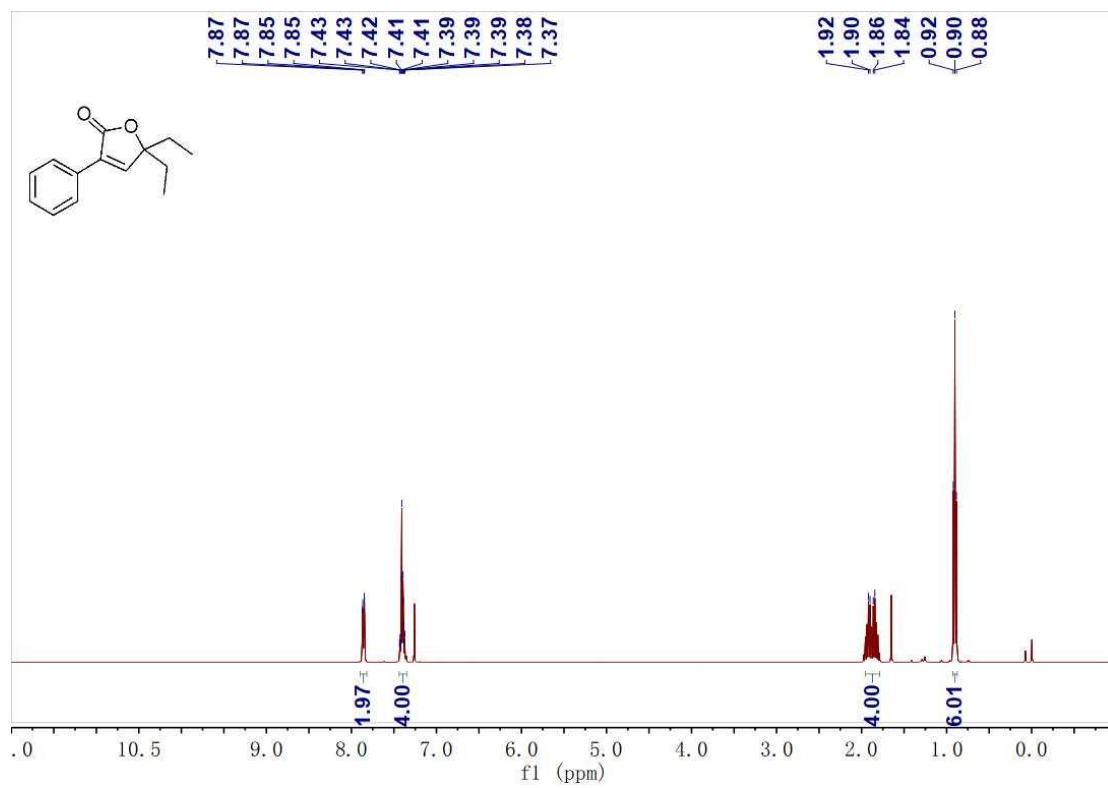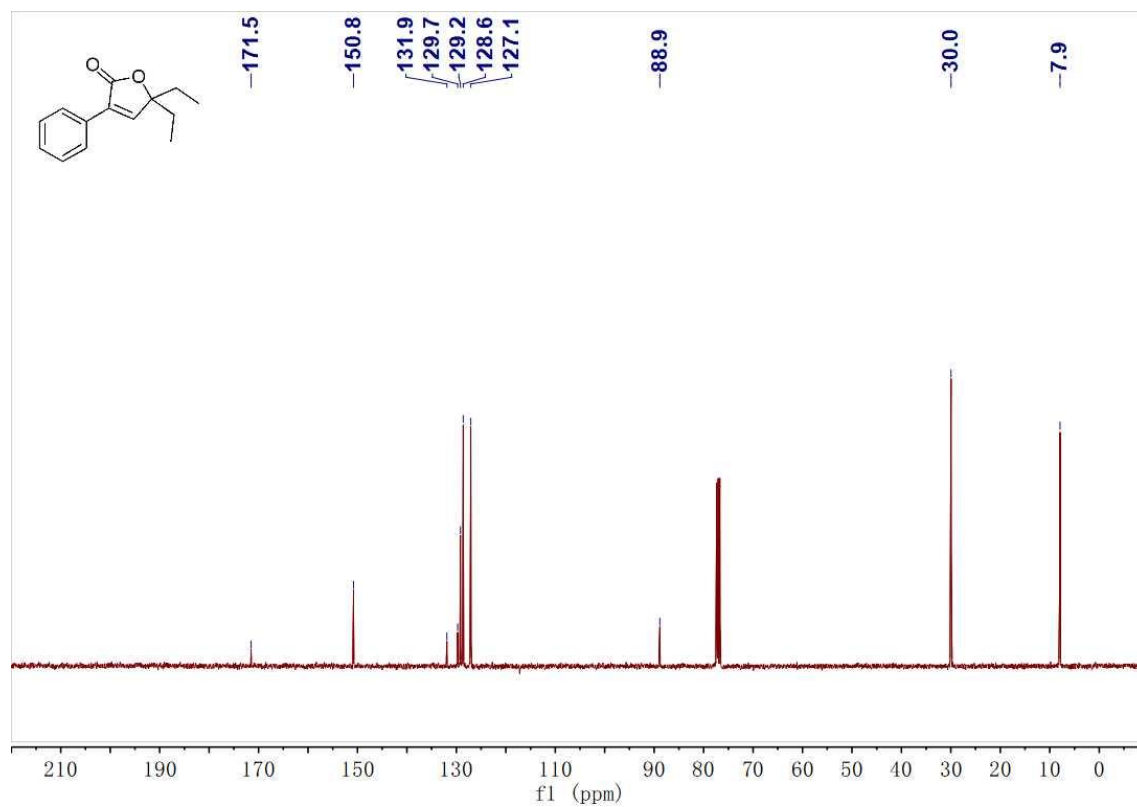

S65

# 2u

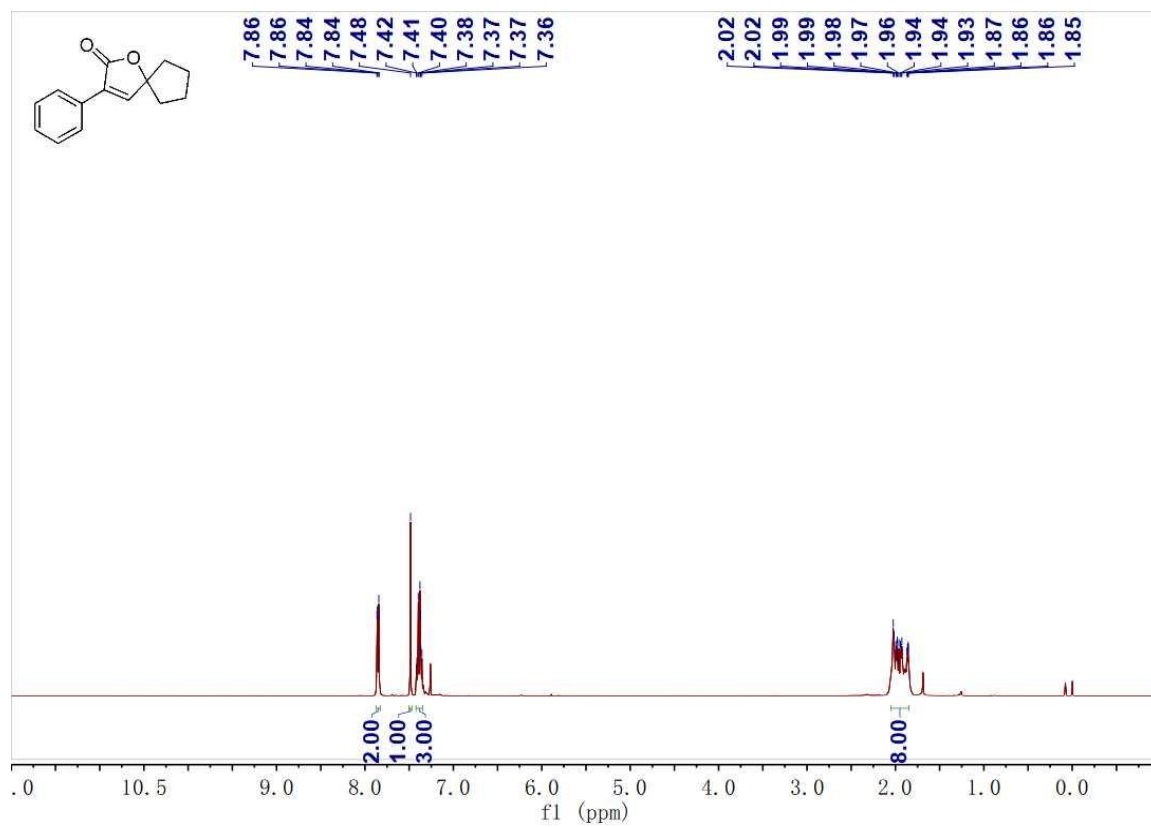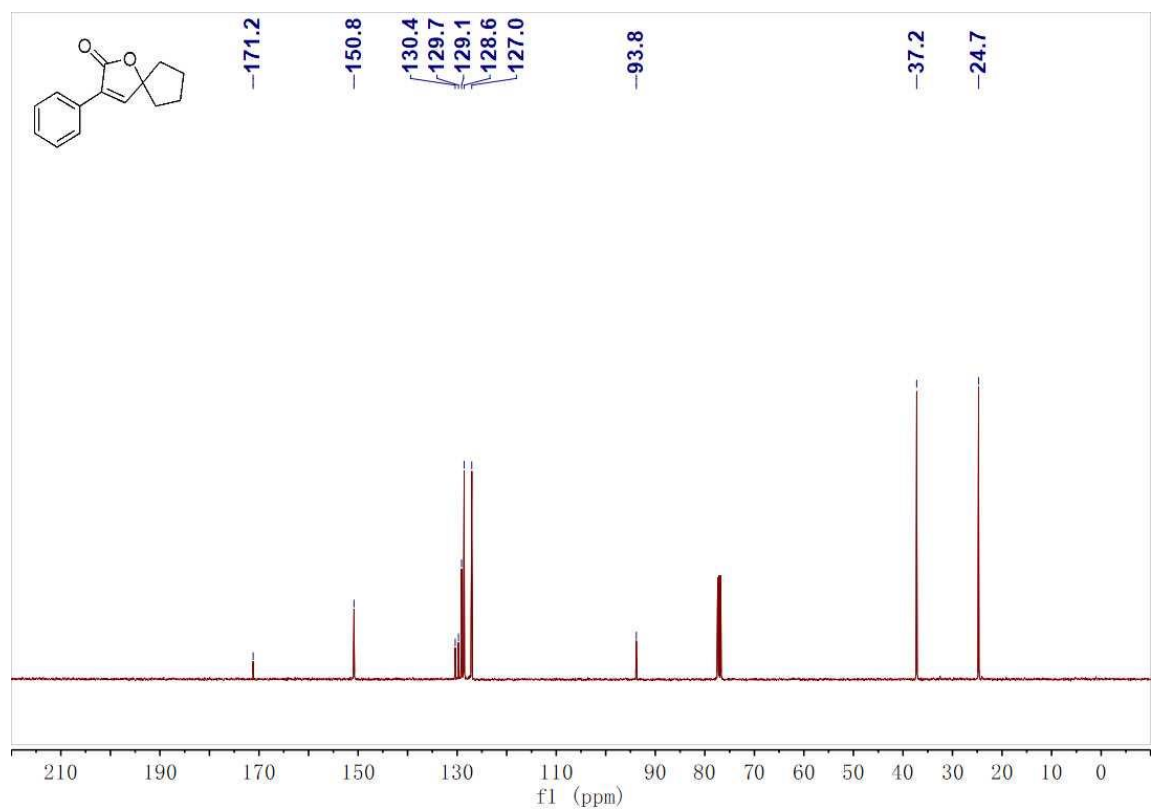

2v

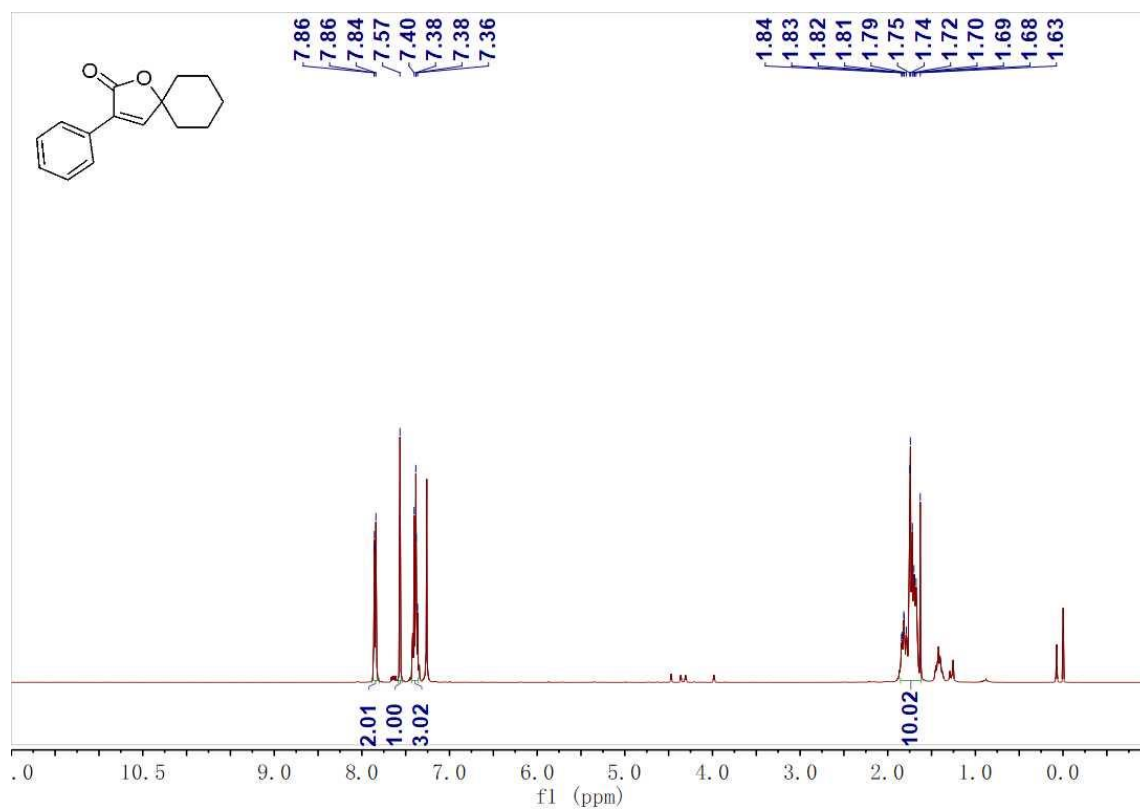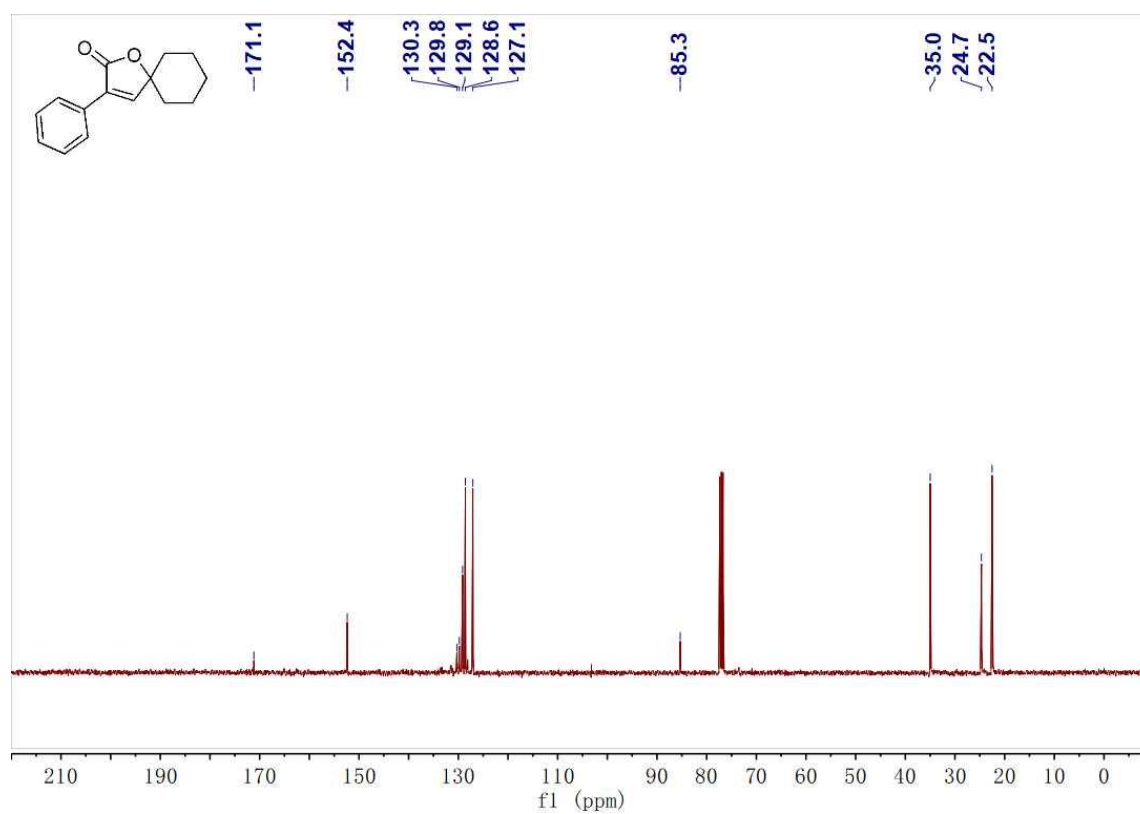

S67

2w

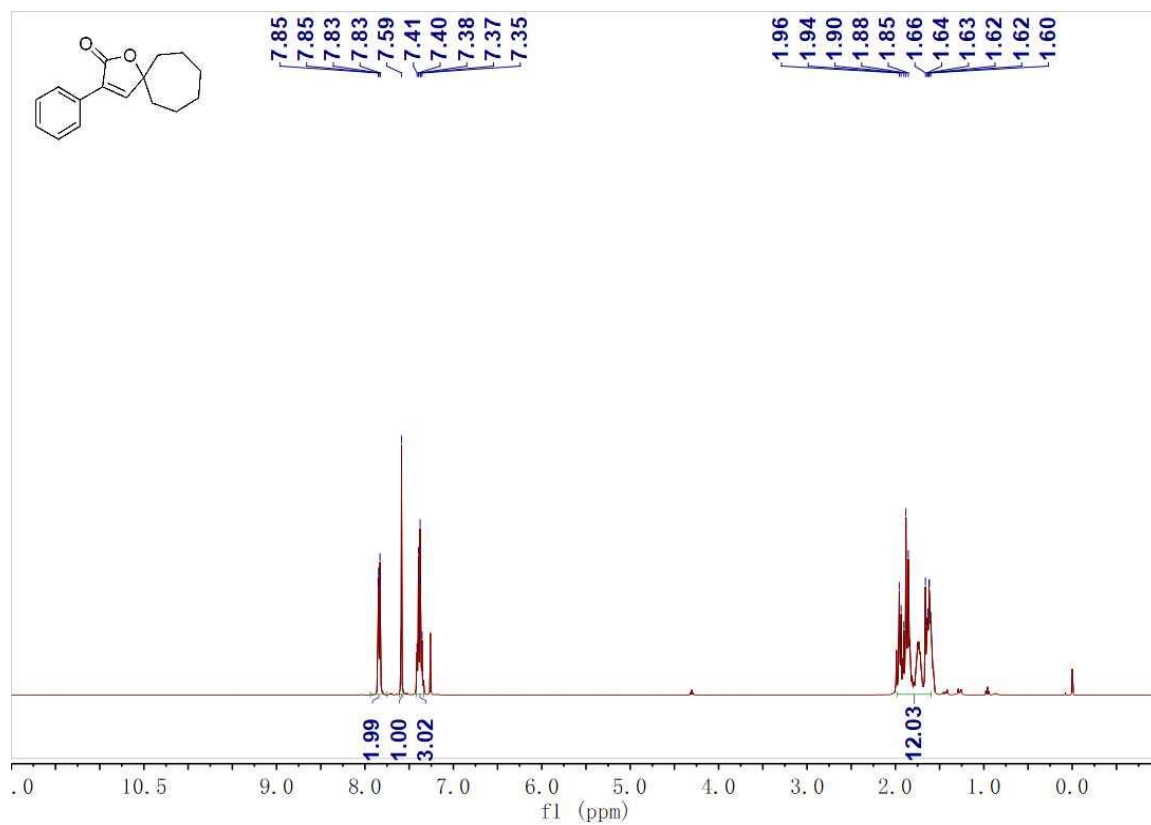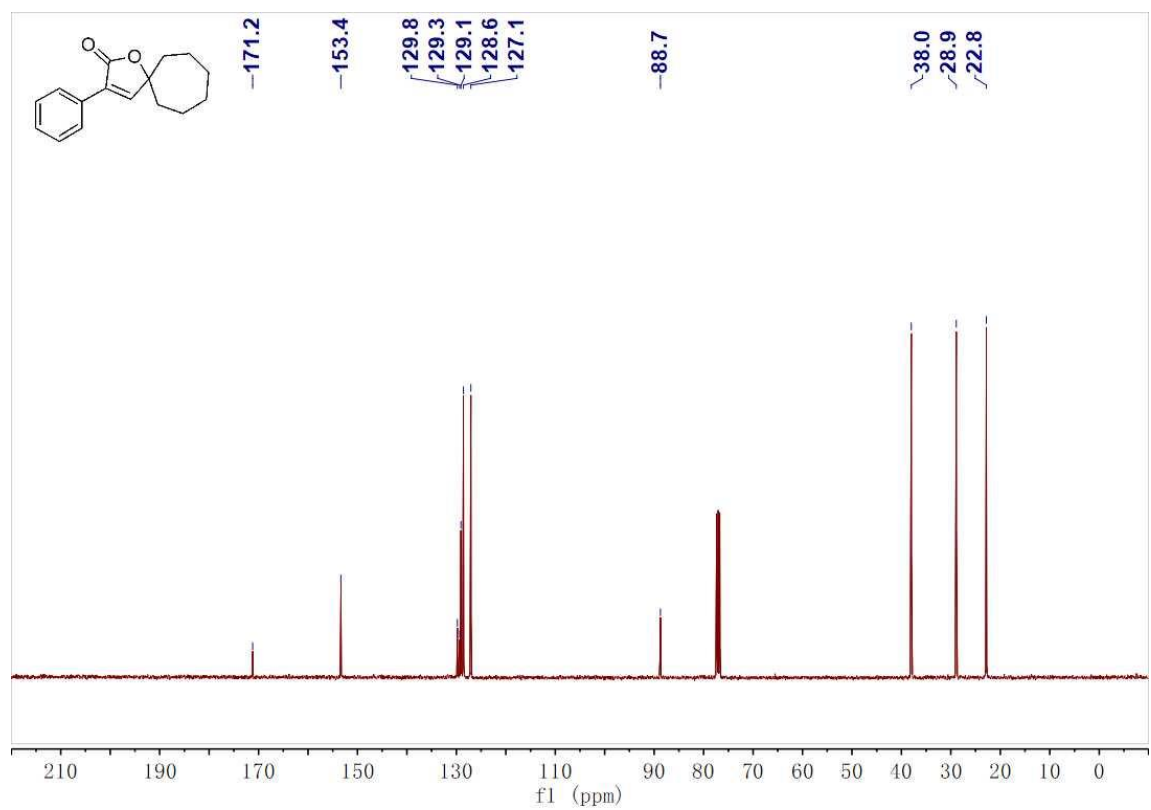

S68

2x

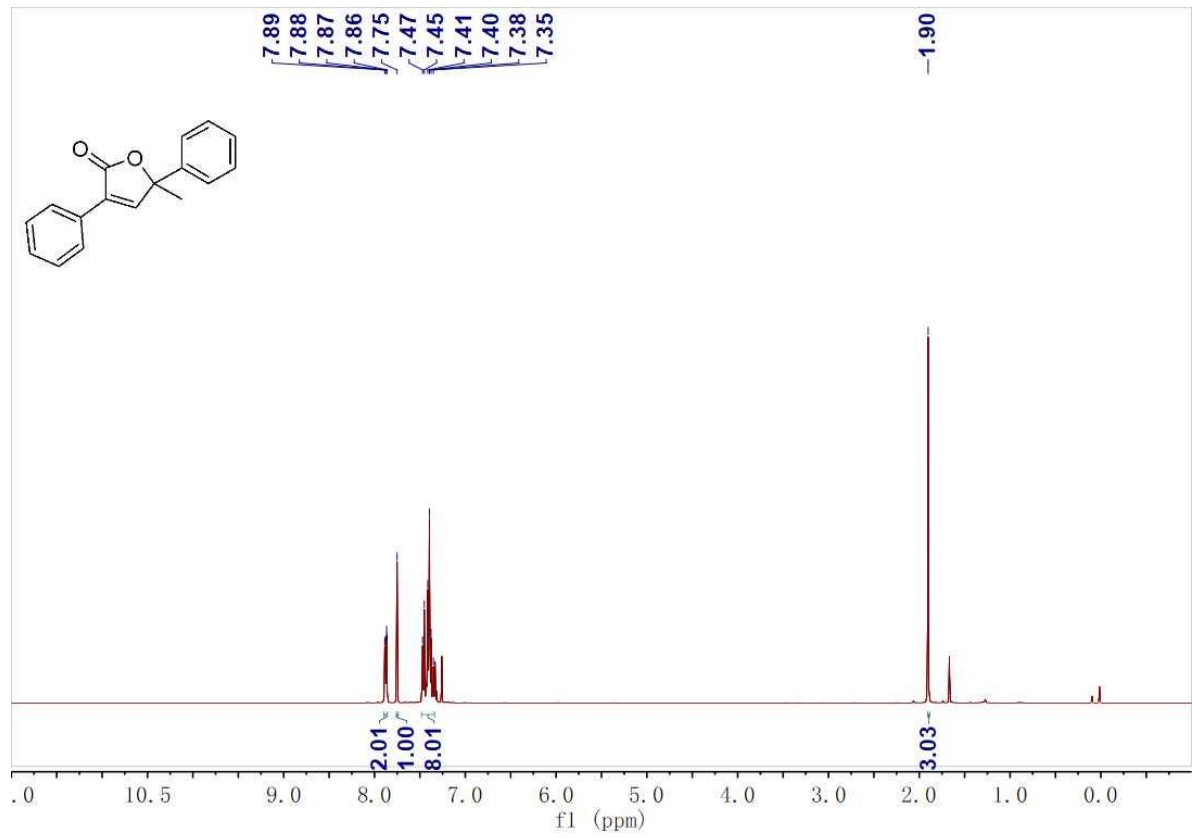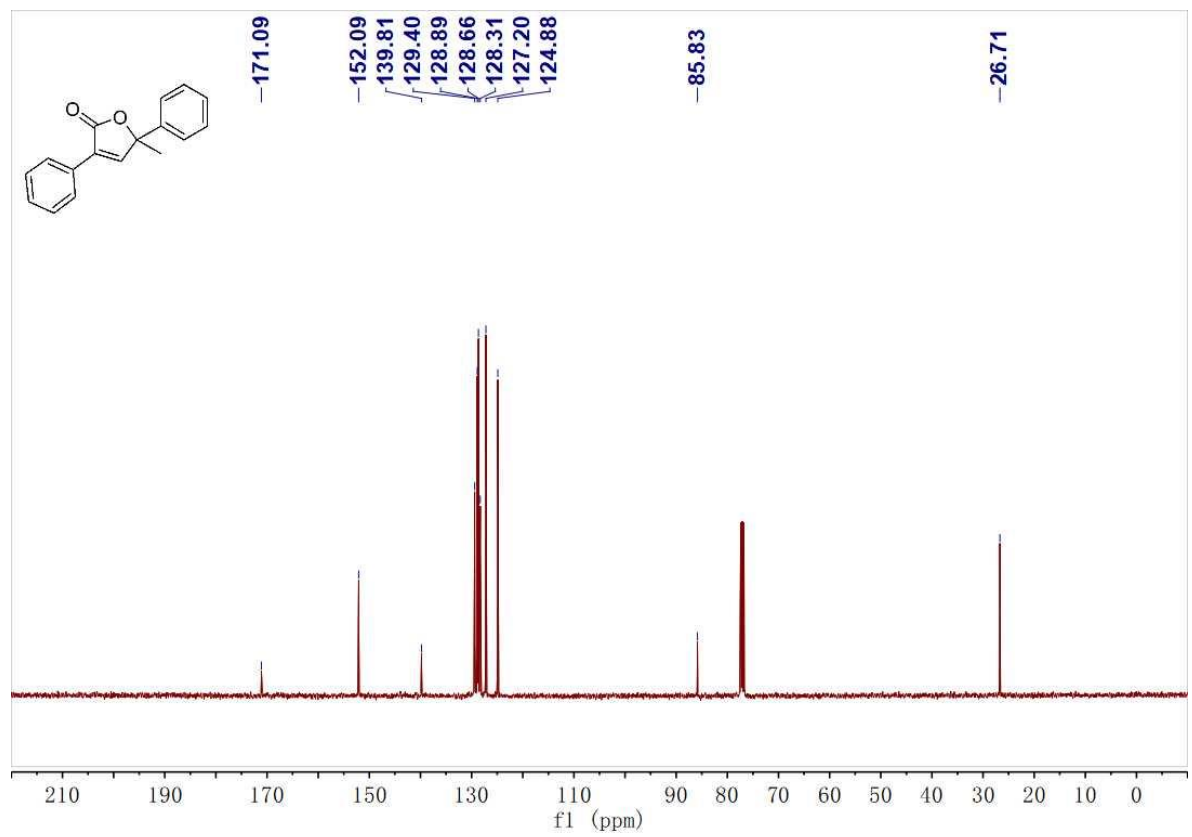

S69

2y

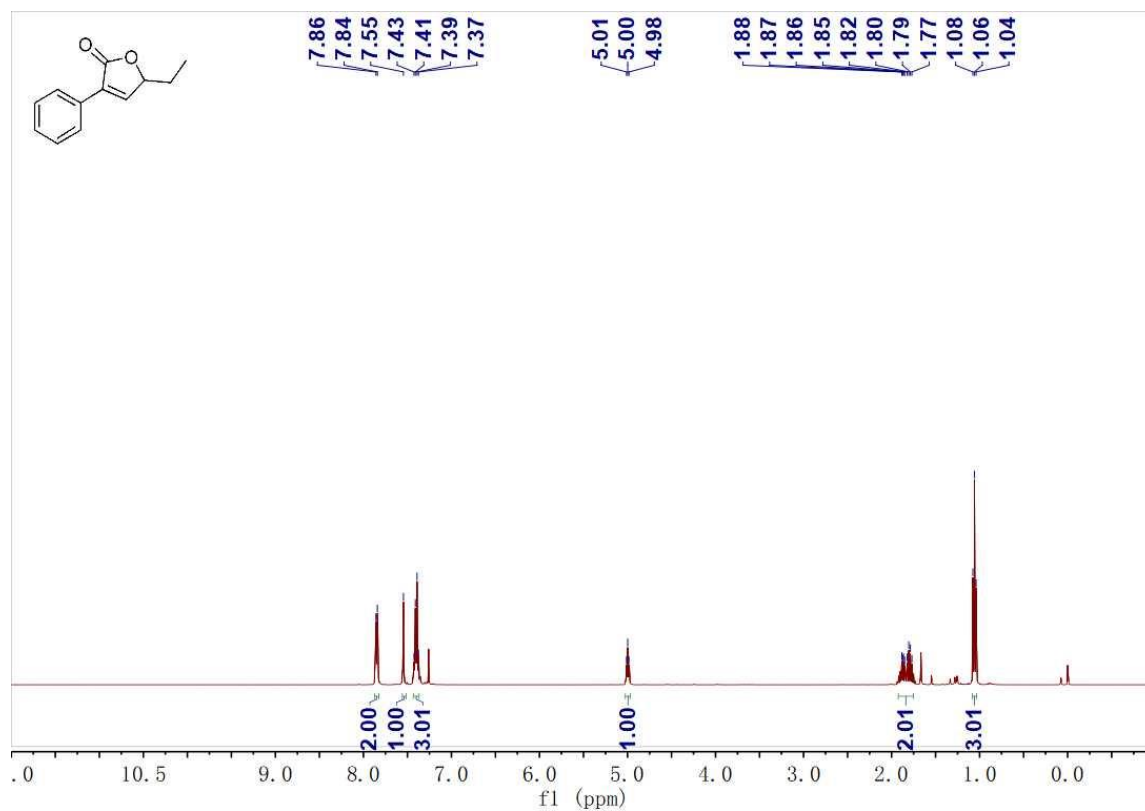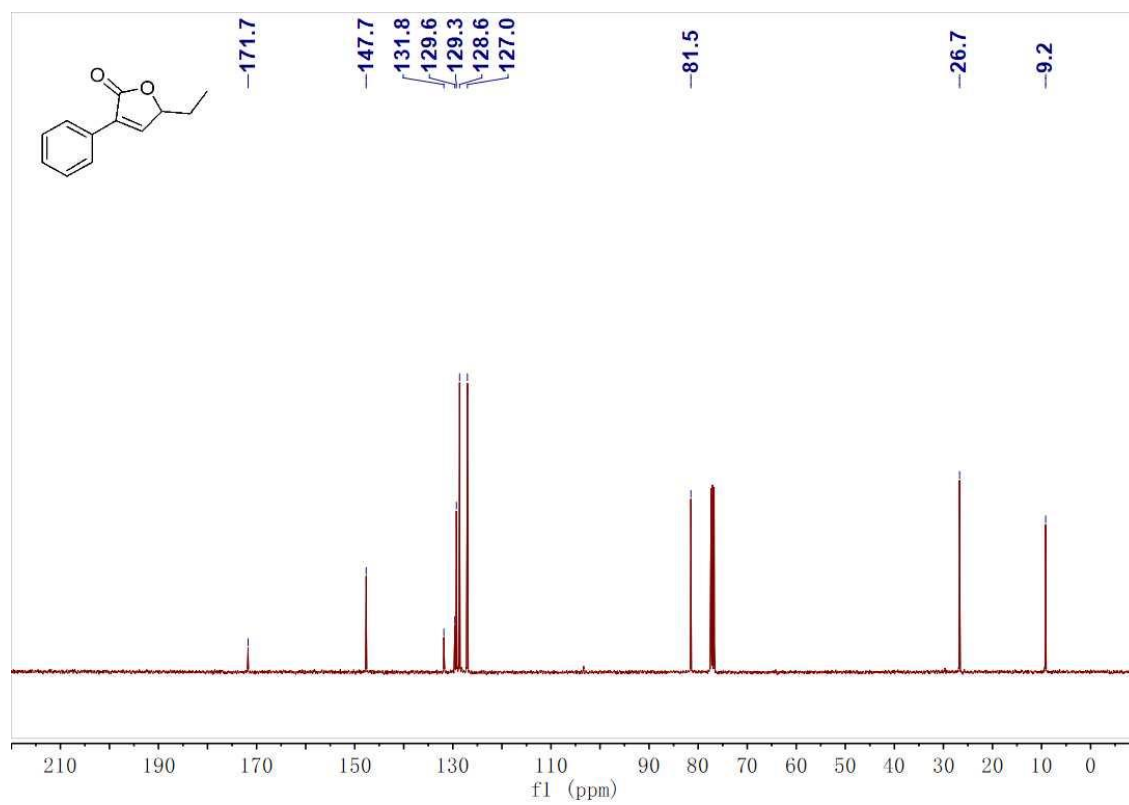

Supplement: c9qo00779b1.pdf [file c9qo00779b1.pdf]
